# Supplementary material for: Clinical spectrum of individuals with pathogenic NF1 missense variants affecting p.Met1149, p.Arg1276, and p.Lys1423: genotype–phenotype study in neurofibromatosis type 1
Source: PubMed Central journal article supplement — Hum Mutat. 2019 Oct 26;41(1):299–315. doi: 10.1002/humu.23929 (PMC6973139; doi:10.1002/humu.23929), 2019-10-26
Supplement: HUMU-41-299-s005.pdf [file HUMU-41-299-s005.pdf]

## Supporting Information

**Supp. Methods.** Summary of methodology and research approach.

**Supp. Table S1.** *In silico* prediction of pathogenicity and *in vivo* splicing analysis of all possible *NFI* missense variants affecting p.Met1149.

**Supp. Table S2.** *In silico* prediction of pathogenicity and *in vivo* splicing analysis of all possible *NFI* missense variants affecting p.Arg1276.

**Supp. Table S3.** *In silico* prediction of pathogenicity and *in vivo* splicing analysis of all possible *NFI* missense variants affecting p.Lys1423.

**Supp. Table S4.** Clinical details for individuals with *NFI* splice variants mimicking missense variants at p.Lys1423.

**Supp. Table S5.** The classification of *NFI* missense variants affecting p.Met1149, p.Arg1276 and p.Lys1423 reported in the studied group according to the ACMG recommendations.

**Supp. Table S6.** Clinical details for 70 individuals with one of four different amino substitutions at *NFI* p.Met1149 from 51 different families.

**Supp. Table S7.** Spectrum of clinical features in individuals heterozygous for pathogenic *NFI* missense variants affecting p.Met1149.

**Supp. Table S8.** Noonan-like features in individuals heterozygous for pathogenic *NFI* missense variants affecting p.Met1149.

**Supp. Table S9.** Clinical characterization of individuals heterozygous for pathogenic *NFI* missense variants affecting p.Met1149 who did not fulfill the current NIH diagnostic criteria, based on physical features, not taking family history into account.

**Supp. Table S10.** Clinical details for 119 individuals with one of five different amino substitutions at *NFI* p.Arg1276 from 101 different families.

**Supp. Table S11.** Spectrum of clinical features in individuals heterozygous for pathogenic *NFI* missense variants affecting p.Arg1276.

**Supp. Table S12.** Clinical details for 94 individuals with one of five different amino substitutions at *NFI* p.Lys1423 from 87 different families.

**Supp. Table S13.** Spectrum of clinical features in individuals heterozygous for pathogenic *NFI* missense variants affecting p.Lys1423.

**Supp. Table S14.** Spinal neurofibromas in individuals heterozygous for pathogenic *NFI* missense variants affecting p.Arg1276.

**Supp. Table S15.** Spinal neurofibromas in individuals heterozygous for pathogenic *NFI* missense variants affecting p.Lys1423.

**Supp. Table S16.** Plexiform neurofibromas in individuals heterozygous for pathogenic *NF1* missense variants affecting p.Lys1423.

**Supp. Table S17.** Plexiform neurofibromas in individuals heterozygous for pathogenic *NF1* missense variants affecting p.Arg1276.

**Supp. Table S18.** Comparison of clinical features of the cohort of individuals heterozygous for pathogenic *NF1* missense variants affecting p.Arg1276 and p.Lys1423 with the cohort of the individuals carrying one out of the 18 most frequent recurrent pathogenic nonsense variants observed in the University of Alabama at Birmingham (UAB) database.

**Supp. Table S19.** Clinical characterization of individuals heterozygous for pathogenic *NF1* missense variants affecting p.Arg1276 who did not fulfill the current NIH diagnostic criteria, based on physical features, not taking family history into account.

**Supp. Table S20.** Noonan-like features in individuals heterozygous for pathogenic *NF1* missense variants affecting p.Arg1276.

**Supp. Table S21.** Noonan-like features in individuals heterozygous for pathogenic *NF1* missense variants affecting p.Lys1423.

**Supp. Table S22.** Cardiovascular abnormalities in individuals heterozygous for pathogenic *NF1* missense variants affecting p.Arg1276.

**Supp. Table S23.** Cardiovascular abnormalities in individuals heterozygous for pathogenic *NF1* missense variants affecting p.Lys1423.

**Supp. Table S24.** List of all adjusted *P* values from Table 1 after applying the Benjamini-Hochberg correction for multiple testing with false discovery rates (FDR) at 0.05 and 0.01.

**Supp. Table S25.** List of all adjusted *P* values from Table 2 after applying the Benjamini-Hochberg correction for multiple testing with false discovery rates (FDR) at 0.05 and 0.01.

**Supp. Table S26.** List of all adjusted *P* values from Table 3 after applying the Benjamini-Hochberg correction for multiple testing with false discovery rates (FDR) at 0.05 and 0.01.

**Supp. Table S27.** List of all adjusted *P* values from Supporting Information Table S18 after applying the Benjamini-Hochberg correction for multiple testing with false discovery rates (FDR) at 0.05 and 0.01.

**Supp. Table S28.** Skeletal abnormalities in individuals heterozygous for pathogenic *NF1* missense variants affecting p.Met1149, p.Arg1276 and p.Lys1423.

**Supp. Table S29.** Comparison of clinical features of the cohorts of individuals heterozygous for pathogenic *NF1* missense variants affecting p.Met1149, p.Arg1276 and p.Lys1423 referred for molecular *NF1* genetic testing to the Medical Genomics Laboratory at the University of Alabama at Birmingham (UAB) and to the collaborating institutions in Europe (EUR).

**Supp. Table S30.** List of all adjusted *P* values from Supporting Information Table S29 after applying the Benjamini-Hochberg correction for multiple testing with false discovery rates (FDR) at 0.05 and 0.01.

**Supp. Table S31.** The prevalence of pulmonic stenosis in the studied cohorts and in individuals heterozygous for pathogenic *NF1* missense variants affecting codons 1809 and 844-848, p.Met992del, the cohort of the individuals carrying one out of the 18 most frequent recurrent pathogenic nonsense variants observed in the University of Alabama at Birmingham (UAB) database and in the general NF1 population.

**Supp. Table S32.** The overall prevalence of cardiac/cardiovascular abnormalities, excluding hypertension as the only feature, in the studied cohorts and in individuals heterozygous for pathogenic *NF1* missense variants affecting codons 1809 and 844-848, p.Met992del, the cohort of the individuals carrying one out of the 18 most frequent recurrent pathogenic nonsense variants observed in the University of Alabama at Birmingham (UAB) database and in the general NF1 population.

**Supp. Figure S1.** The classification of *NF1* missense variants affecting p.Met1149, p.Arg1276 and p.Lys1423: comparison of the classification reported in publicly available disease databases (HGMD, LOVD and ClinVar) with the current study (as of December 2018).

**Supp. Figure S2.** Pedigrees of the familial cases heterozygous for pathogenic *NF1* missense variants affecting p.Met1149 in the current study.

**Supp. Figure S3.** Pedigrees of the familial cases heterozygous for pathogenic *NF1* missense variants affecting p.Arg1276 in the current study.

**Supp. Figure S4.** Pedigrees of the familial cases heterozygous for pathogenic *NF1* missense variants affecting p.Lys1423 in the current study.

**Supp. Figure S5.** Coronal T2-weighted STIR MR images of the cervical (A), lumbosacral (B) and dorsal (C) spine showing bilateral giant and fairly confluent plexiform neurofibromas of all paraspinal nerves and plexuses in individual EUR-R22-F. Note the intraspinal tumor origin in all the spinal foramina which appear widening without extension in the spinal canal. Referred by Marica Eoli, MD (Fondazione IRCCS Istituto Neurologico Carlo Besta, Milan, Italy).

**Supp. Methods.** Summary of methodology and research approach.

The collaborating institutions included the following centers: Molecular Genetics Unit, Casa Sollievo della Sofferenza Hospital, IRCSS, San Giovanni Rotondo, Italy (11 probands and 3 relatives), University Hospital, Ghent, Belgium (10 probands and 2 relatives), Carlo Besta Neurological Institute, IRCSS, Milan, Italy (10 probands and 1 relative), University of Leuven, Belgium (8 probands), Medical University of Innsbruck, Austria (5 probands and 2 relatives), University of Padova, Italy (6 probands) and Hospital Universitario Ramón y Cajal, IRYCIS and CIBERER, Madrid, Spain (5 probands).

Comprehensive *NF1* molecular screening using an RNA-based approach complemented by DNA-dosage analysis was performed in the Medical Genomics Laboratory at UAB as previously described (Messiaen et al., 2000; Messiaen et al., 2012) with LRG\_214 and NM\_000267.3 used as the reference sequences. For exon numbering we used the NCBI numbering, followed by the historical numbering originally developed by the NF1 community in square brackets (Messiaen et al., 2012). To predict the pathogenic effect of the missense variants described herein, we used the same approach as previously reported (Rojnueangnit et al., 2015; Koczkowska et al., 2018) according to the ACMG recommendations (Richards et al., 2015).

Clinical data were collected as previously described (Rojnueangnit et al., 2015; Koczkowska et al., 2018; Koczkowska et al., 2019) using a detailed standardized phenotypic checklist form at the time of genetic testing and re-verified by referring physicians for accuracy and/or updating, when available. As no magnetic resonance imaging (MRI) results were available for most individuals without clinical signs/suspicions for spinal neurofibromas or optic pathway gliomas (OPGs), presence of internal neurofibromas and asymptomatic OPGs could not be excluded in all cases. An individual was classified as having a Noonan-like phenotype when at least two of the following features were present: short stature, dysmorphic facies (low set ears, hypertelorism, downslanting palpebral fissures, midface hypoplasia, ptosis and/or webbed neck), pectus and/or cardiac abnormalities. Genetic testing of Noonan-related disorder gene(s) was performed in individuals presenting with Noonan-like features (NS; MIM# 163950) (Supporting Information Tables S6, S8, S10, S12 and S20-S21). Height and head circumference at a given age were converted to percentiles at  $PC \leq 3$  for short stature and  $PC \geq 98$  for macrocephaly as previously reported (Rojnueangnit et al., 2015; Koczkowska et al., 2018; Koczkowska et al., 2019). To establish genotype-phenotype correlations, we used the same approach as previously described (Rojnueangnit et al., 2015; Koczkowska et al., 2018; Koczkowska

et al., 2019) by comparing the phenotypes in the studied cohorts with the cohorts of individuals heterozygous for pathogenic *NF1* missense variants affecting codons 1809 and 844-848 (Nyström et al., 2009; Ekvall et al., 2014; Pinna et al., 2015; Rojnueangnit et al., 2015; Santoro et al., 2015; Koczkowska et al., 2018), the *NF1* p.Met992del (Upadhyaya et al., 2007; Koczkowska et al., 2019) and cohorts of individuals with “classic” NF1 phenotype (Huson et al., 1988; Huson et al., 1989a; Huson et al., 1989b; Listernick et al., 1994; Friedman et al., 1997; Cnossen et al., 1998; McGaughran et al., 1999; Thakkar et al., 1999; Lin et al., 2000; Blazo et al., 2004; Khosrotehrani et al., 2005; Plotkin et al., 2012; Blanchard et al., 2016). Additionally, we compared the phenotypes in the studied cohorts with the cohort of individuals carrying one out of the 18 most recurrent nonsense variants identified in the UAB database.

**Supp. Table S1.** *In silico* prediction of pathogenicity and *in vivo* splicing analysis of all possible *NFI* missense variants affecting p.Met1149.

| Variant   | Protein      | p.Met1149 positive probands | gnomAD (123,136) | EVS (6,503) | 1000 G | HGMD <sup>A</sup> | LOVD (4,602) <sup>A</sup> | ClinVar (3,941) <sup>A</sup> | Grantham distance | SIFT               | PolyPhen                  | CADD | REVEL | SSF/MaxEntScan/ NNSplice                                                                                                                                                           | RNA observed    | Other evidence                                                                                                                                                                                                             |
|-----------|--------------|-----------------------------|------------------|-------------|--------|-------------------|---------------------------|------------------------------|-------------------|--------------------|---------------------------|------|-------|------------------------------------------------------------------------------------------------------------------------------------------------------------------------------------|-----------------|----------------------------------------------------------------------------------------------------------------------------------------------------------------------------------------------------------------------------|
| c.3445A>C | p.Met1149Leu | 0/51                        | 0                | 0           | 0      | 0                 | 0                         | 0                            | 15                | Tolerated (0.6)    | Benign (0.257)            | 25.3 | 0.362 | No change                                                                                                                                                                          | N/A             | -                                                                                                                                                                                                                          |
| c.3445A>G | p.Met1149Val | 38/51                       | <0.01%           | 0           | 0      | Present (DM)      | 5 (P)                     | 2 (P/LP)                     | 21                | Deleterious (0.04) | Benign (0.452)            | 24.3 | 0.875 | Creates a novel splice acceptor sequence: from WT (-) / (-) / (-) to MUT 79.2 / 5.8 / 0.2                                                                                          | Normal missense | Proven de novo (UAB-R9123, UAB-R9563, UAB-R1324, UAB-R7725, UAB-R58801FN.203); segregation in multiple families (UAB-R8931, UAB-R7911, UAB-R0292, UAB-R9123, UAB-R0154, UAB-R7654, UAB-R5694, UAB-R7885, UAB-R61001FN.201) |
| c.3445A>T | p.Met1149Leu | 1/51                        | 0                | 0           | 0      | 0                 | 0                         | 0                            | 15                | Tolerated (0.6)    | Benign (0.257)            | 25.5 | 0.362 | No change                                                                                                                                                                          | Normal missense | observed in a single proband (UAB-R1495)                                                                                                                                                                                   |
| c.3446T>A | p.Met1149Lys | 0/51                        | 0                | 0           | 0      | 0                 | 0                         | 0                            | 95                | Deleterious (0)    | Possibly damaging (0.814) | 28.5 | 0.838 | Creates a novel splice acceptor sequence: from WT (-) / (-) / (-) to MUT (-) / 3.0 / (-)                                                                                           | N/A             | -                                                                                                                                                                                                                          |
| c.3446T>C | p.Met1149Thr | 6/51                        | 0                | 0           | 0      | 0                 | 0                         | 0                            | 81                | Deleterious (0.01) | Possibly damaging (0.814) | 25.1 | 0.827 | No change                                                                                                                                                                          | Normal missense | Proven de novo (UAB-R4191, UAB-R1667); segregation in family (UAB-R3656)                                                                                                                                                   |
| c.3446T>G | p.Met1149Arg | 0/51                        | 0                | 0           | 0      | 0                 | 0                         | 1 <sup>B</sup> (VUS)         | 91                | Deleterious (0)    | Possibly damaging (0.914) | 26.7 | 0.826 | Creates a novel splice acceptor sequence: from WT (-) / (-) / (-) to MUT (-) / 3.9 / (-)<br>Creates a novel splice donor sequence: from WT (-) / (-) / (-) to MUT 72.3 / 1.8 / 0.1 | N/A             | -                                                                                                                                                                                                                          |
| c.3447G>A | p.Met1149Ile | 4/51                        | 0                | 0           | 0      | Present (DM)      | 1 (VUS)                   | 3 <sup>C</sup> (P/LP)        | 10                | Tolerated (0.06)   | Possibly damaging (0.656) | 27.7 | 0.628 | No change                                                                                                                                                                          | Normal missense | Segregation in multiple families (UAB-R2347, UAB-R5855, UAB-R2474)                                                                                                                                                         |
| c.3447G>C | p.Met1149Ile | 1/51                        | 0                | 0           | 0      | 0                 | 0                         | 1 (P)                        | 10                | Tolerated (0.06)   | Possibly damaging (0.656) | 26.7 | 0.429 | No change                                                                                                                                                                          | N/A             | Segregation in family (UAB-R86801FN.103)                                                                                                                                                                                   |
| c.3447G>T | p.Met1149Ile | 1/51                        | 0                | 0           | 0      | 0                 | 0                         | 1 (P)                        | 10                | Tolerated (0.06)   | Possibly damaging (0.656) | 27   | 0.627 | No change                                                                                                                                                                          | Normal missense | Segregation in family (UAB-R7741)                                                                                                                                                                                          |

<sup>A</sup> The variants' classification presented in round brackets is as reported by the original author(s) (as of December 2018); <sup>B</sup> The variant was reported in a single individual with hereditary cancer-predisposing syndrome, not NF1; <sup>C</sup> Including 2 individuals with NF1 (classified as *pathogenic* and *likely pathogenic* in each individual) and 1 individual with an unknown condition (the condition type was not provided by the original author) with a variant classification as *likely pathogenic*.

**Abbreviations** - **gnomAD**: the **G**enome **A**ggregation **D**atabase; **EVS**: **E**xome **V**ariant **S**erver; **1000 G**: **1000** Genomes Project; **HGMD**: **H**uman **G**ene **M**utation **D**atabase; **LOVD**: **L**eiden **O**pen **V**ariation **D**atabase; **SIFT**: **S**orting **I**ntolerant **F**rom **T**olerant; **CADD**: **C**ombined **A**nnotation **D**ependent **D**epletion; **REVEL**: **R**are **E**xome **V**ariant **E**nsemble **L**earner (Ioannidis et al., 2016); **SSF**: **S**plice **S**ite **F**inder-like; **VUS**: **v**ariant of **u**ncertain **s**ignificance; **P**: **p**athogenic; **LP**: **l**ikely **p**athogenic; **DM**: **d**isease causing; **N/A**: **n**ot **a**pplicable.

**Supp. Table S2.** *In silico* prediction of pathogenicity and *in vivo* splicing analysis of all possible *NF1* missense variants affecting p.Arg1276.

| Variant                | Protein      | p.Arg1276 positive probands <sup>A</sup> | gnomAD (123,136)    | EVS (6,503) | 1000 G | HGMD <sup>B</sup> | LOVD (4,602) <sub>B</sub> | ClinVar (3,941) <sub>B</sub> | Grantham distance | SIFT            | PolyPhen                  | CADD | REVEL | SSF/MaxEntScan/ NNSplice                                                                                         | RNA observed    | Other evidence                                                                                                                                                                                                                                                    |
|------------------------|--------------|------------------------------------------|---------------------|-------------|--------|-------------------|---------------------------|------------------------------|-------------------|-----------------|---------------------------|------|-------|------------------------------------------------------------------------------------------------------------------|-----------------|-------------------------------------------------------------------------------------------------------------------------------------------------------------------------------------------------------------------------------------------------------------------|
| c.3826C>G              | p.Arg1276Gly | 14/100                                   | 0                   | 0           | 0      | Present (DM)      | 4 (P)                     | 3 <sup>C</sup> (LP/NP)       | 125               | Deleterious (0) | Probably damaging (0.992) | 33   | 0.878 | No change                                                                                                        | Normal missense | Proven de novo (UAB-R1175, UAB-R8312, UAB-R8876, UAB-R3396; EUR-R9); segregation in family (UAB-R1175; UAB-R37411FN.204)                                                                                                                                          |
| c.3827G>A <sup>D</sup> | p.Arg1276Gln | 80/100                                   | <0.01% <sup>E</sup> | 0           | 0      | Present (DM)      | 14 <sup>F</sup> (P/LP)    | 7 <sup>G</sup> (P/NP)        | 43                | Deleterious (0) | Probably damaging (0.997) | 34   | 0.887 | No change                                                                                                        | Normal missense | Proven de novo (UAB-R0082, UAB-R3605, UAB-R8805, UAB-R6515, UAB-R0306, UAB-R8666, UAB-R221011FN.101; EUR-R27); segregation in multiple families (UAB-R0522, UAB-R7733, UAB-R8484, UAB-R0215, UAB-R1256, UAB-R6328; UAB-R743; UAB-R834; EUR-R21; EUR-R22; EUR-R28) |
| c.3827G>C              | p.Arg1276Pro | 3/100                                    | 0                   | 0           | 0      | Present (DM)      | 0                         | 3 (P)                        | 103               | Deleterious (0) | Probably damaging (0.998) | 34   | 0.903 | Increases strength of a cryptic exonic splice acceptor sequence from WT 76.2 / (-) / (-) to MUT 87.1 / 6.1 / 0.9 | Normal missense | -                                                                                                                                                                                                                                                                 |
| c.3827G>T              | p.Arg1276Leu | 3/100                                    | 0                   | 0           | 0      | 0                 | 0                         | 0                            | 102               | Deleterious (0) | Probably damaging (0.992) | 34   | 0.918 | Increases strength of a cryptic exonic splice acceptor sequence from WT 76.2 / (-) / (-) to MUT 80.9 / 6.4 / 0.9 | Normal missense | Segregation in families (UAB-R3393, UAB-R8304)                                                                                                                                                                                                                    |

<sup>A</sup> Excluding one proband (UAB-R5166) heterozygous for the *NF1* c.3826\_3827delinsGA (p.Arg1276Glu; see details in Supp. Information Table S10); <sup>B</sup> The variants' classification presented in round brackets is as reported by the original author(s) (as of December 2018); <sup>C</sup> Conflicting interpretations of pathogenicity, including *likely pathogenic* in 1 individual with NF1 and in 1 individual with an unknown condition (no details provided by the author); for the third individual no variant's classification nor condition type was provided; <sup>D</sup> A single individual (UAB-R9572) carried a second *NF1* variant c.8002G>A (p.Val2668Met); as the individual's parents were not available for follow-up and for inheritance verification, according to the ACMG guidelines c.8002G>A (p.Val2668Met) is classified as VUS (see details in Supp. Information Table S10); <sup>E</sup> Variant c.3827G>A (p.Arg1276Gln) is absent in gnomAD database when specifically looking only in a cohort of individuals with no neurological features and non-cancer phenotype; <sup>F</sup> Including 13 individuals with the *NF1* p.Arg126Gln variant classified as *pathogenic* and 1 individual as *likely pathogenic*; <sup>G</sup> Conflicting interpretations of pathogenicity, including *pathogenic* in 5 individuals (3 with NF1 and 2 with an unknown condition type); for 2 additional individuals (1 with NF1 and 1 with an unknown condition type) no variant classification was provided.

**Abbreviations** - **gnomAD**: the **Genome Aggregation Database**; **EVS**: **Exome Variant Server**; **1000 G**: **1000 Genomes Project**; **HGMD**: **Human Gene Mutation Database**; **LOVD**: **Leiden Open Variation Database**; **SIFT**: **Sorting Intolerant From Tolerant**; **CADD**: **Combined Annotation Dependent Depletion**; **REVEL**: **Rare Exome Variant Ensemble Learner** (Ioannidis et al., 2016); **SSF**: **SpliceSiteFinder-like**; **VUS**: **variant of uncertain significance**; **P**: **pathogenic**; **LP**: **likely pathogenic**; **DM**: **disease causing**; **NP**: **not provided**.

**Supp. Table S3.** *In silico* prediction of pathogenicity and *in vivo* splicing analysis of all possible *NFI* missense variants affecting p.Lys1423.

| Variant                | Protein      | p.Lys1423 positive probands | gnomAD (123,136) | EVS (6,503) | 1000 G | HGMD <sup>A</sup> | LOVD (4,602) <sup>A</sup> | ClinVar (3,941) <sup>A</sup> | Grantham distance | SIFT            | PolyPhen                  | CADD | REVEL | SSF/MaxEntScan/ NNSplice                                                                         | RNA observed                                                                         | Other evidence                                                                                                                                                      |
|------------------------|--------------|-----------------------------|------------------|-------------|--------|-------------------|---------------------------|------------------------------|-------------------|-----------------|---------------------------|------|-------|--------------------------------------------------------------------------------------------------|--------------------------------------------------------------------------------------|---------------------------------------------------------------------------------------------------------------------------------------------------------------------|
| c.4267A>C              | p.Lys1423Gln | 7/87                        | 0                | 0           | 0      | Present (DM?)     | 2 (VUS)                   | 0                            | 53                | Deleterious (0) | Probably damaging (0.989) | 26.4 | 0.919 | Increases strength of the splice donor sequence from WT 83.2 / 6.4 / 0.4 to MUT 83.5 / 6.6 / 0.4 | Normal missense                                                                      | Proven de novo (UAB-R9805)                                                                                                                                          |
| c.4267A>G <sup>B</sup> | p.Lys1423Glu | 77/87                       | 0                | 0           | 0      | Present (DM)      | 20 <sup>C</sup> (P/LP)    | 7 <sup>D</sup> (P/VUS)       | 56                | Deleterious (0) | Probably damaging (0.974) | 28.1 | 0.905 | Decreases strength of the splice donor sequence from WT 83.2 / 6.4 / 0.4 to MUT 80.4 / 5.4 / 0.3 | Normal missense                                                                      | Proven de novo (UAB-R2741, UAB-R1442, UAB-R5313, UAB-R5973, UAB-R5344, UAB-R1185; EUR-R55); segregation in family (UAB-R4031, UAB-R5651, EUR-R39, EUR-R48, EUR-R54) |
| c.4268A>C              | p.Lys1423Thr | 2/87                        | 0                | 0           | 0      | 0                 | 0                         | 0                            | 78                | Deleterious (0) | Probably damaging (0.989) | 27   | 0.932 | Decreases strength of the splice donor sequence from WT 83.2 / 6.4 / 0.4 to MUT 74.3 / 5.4 / 0.3 | Low level of r.4111_4269del (p.Val1371_Lys1423del) predominant missense <sup>E</sup> | -                                                                                                                                                                   |
| c.4268A>G              | p.Lys1423Arg | 0/87 <sup>F</sup>           | 0                | 0           | 0      | Present (DM)      | 1 (P)                     | 0                            | 26                | Deleterious (0) | Probably damaging (0.974) | 27.2 | 0.849 | Decreases strength of the splice donor sequence from WT 83.2 / 6.4 / 0.4 to MUT 74.2 / 2.6 / 0.2 | r.4111_4269del (p.Val1371_Lys1423del) predominant splicing                           | -                                                                                                                                                                   |
| c.4268A>T              | p.Lys1423Met | 1/87                        | 0                | 0           | 0      | Present (DM)      | 0                         | 0                            | 95                | Deleterious (0) | Probably damaging (0.999) | 28.1 | 0.931 | Decreases strength of the splice donor sequence from WT 83.2 / 6.4 / 0.4 to MUT 74.7 / 3.5 / 0.1 | Low level of r.4111_4269del (p.Val1371_Lys1423del) predominant missense <sup>E</sup> | Proven de novo (UAB-R1753)                                                                                                                                          |
| c.4269G>C              | p.Lys1423Asn | 0/87 <sup>F</sup>           | 0                | 0           | 0      | Present (DM)      | 0                         | 2 <sup>G</sup> (P/LP)        | 94                | Deleterious (0) | Probably damaging (0.989) | 29.4 | 0.859 | Eliminates a splice donor sequence: from WT 83.2 / 6.4 / 0.4 to MUT (-) / (-) / (-)              | r.4111_4269del (p.Val1371_Lys1423del) predominant splicing                           | -                                                                                                                                                                   |
| c.4269G>T              | p.Lys1423Asn | 0/87 <sup>F</sup>           | 0                | 0           | 0      | Present (DM)      | 1 <sup>H</sup> (P)        | 0                            | 94                | Deleterious (0) | Probably damaging (0.989) | 29.9 | 0.859 | Decreases strength of a splice donor sequence: from WT 83.2 / 6.4 / 0.4 to MUT 70.6 / (-) / (-)  | r.4111_4269del (p.Val1371_Lys1423del) predominant splicing                           | -                                                                                                                                                                   |

<sup>A</sup> The variants' classification presented in round brackets is as reported by the original author(s) (as of December 2018); <sup>B</sup> Two individuals (UAB-R1185 and EUR-R55) carried a second *NFI* variant: c.8042A>T (p.Tyr2681Phe) and c.584A>G (p.Lys195Arg), respectively; according to the ACMG guidelines both variants are classified as likely benign (see details in Supp. Table S12); <sup>C</sup> Including 18 individuals with the *NFI* p.Lys1423Glu variant classified as *pathogenic* and in 2 individuals as *likely pathogenic*; <sup>D</sup> Including 6 individuals (4 individuals with NF1, 1 individual with hereditary cancer-predisposing syndrome and 1 with an unknown condition type) with the *NFI* p.Lys1423Glu variant classified as *pathogenic* and 1 individual with NF1 as *variant of uncertain significance*; <sup>E</sup> c.4268A>C and c.4268A>T caused very low missplicing and the major effect was still missense and therefore individuals heterozygous for these two variants were included in the genotype-phenotype analysis, except for c.4268A>T that is considered as "*likely pathogenic*" variant, not pathogenic according to the current ACMG recommendations; <sup>F</sup> In the current study, we identified presence of c.4268A>G, c.4269G>C and c.4269G>T in 4, 3 and 2 individuals, respectively (see phenotypic details in Supp. Table S4); all variants reported in the UAB cohort lead exclusively to skipping of exon 32 [24] during *NFI* mRNA splicing, r.4111\_4269del (p.Val1371\_Lys1423del), thus they are not included in Supp. Table S12 as these alterations should be classified as splicing variants *mimicking* a missense variant, not bona fide missense variants; as no RNA-based approach was applied in the collaborating centers, the missplicing effect could not be confirmed in individuals EUR-R56, EUR-R57, EUR-R58 and EUR-R59; however, it is expected to be identical to what was observed in the UAB cohort; <sup>G</sup> The *NFI* p.Lys1423Asn missense variant was classified as *pathogenic* in 1 individual with NF1 and as *likely pathogenic* in 1 individual with hereditary cancer-predisposing syndrome; <sup>H</sup> The variant was reported in the LOVD database as a missense *pathogenic* variant, however, no RNA-based analysis was performed in this individual (only DNA-dosage analysis). **Abbreviations** - **gnomAD**: the **Genome Aggregation Database**; **EVS**: **Exome Variant Server**; **1000 G**: **1000 Genomes Project**; **HGMD**: **Human Gene Mutation Database**; **LOVD**: **Leiden Open Variation Database**; **SIFT**: **Sorting Intolerant From Tolerant**; **CADD**: **Combined Annotation Dependent Depletion**; **REVEL**: **Rare Exome Variant Ensemble Learner** (Ioannidis et al., 2016); **SSF**: **SpliceSiteFinder-like**; **VUS**: **variant of uncertain significance**; **P**: **pathogenic**; **LP**: **likely pathogenic**; **DM**: **disease causing**; **DM?**: **likely disease causing**.



**Supp. Table S4.** Clinical details for individuals with *NFI* splice variants mimicking missense variants at p.Lys1423.

Supp. Table S4 is included as a separate Excel file.

<sup>A</sup> For individuals with one asterisk (\*) the standardized phenotypic checklist forms were not re-verified/updated by the referring physicians, the data are based on the originally submitted forms; individuals with two asterisks (\*\*) had incomplete phenotypic checklist forms.

<sup>B</sup> **UAB:** University of Alabama at Birmingham (5 probands); **EUR:** individual referred by the European collaborators (4 probands), Molecular Genetics Unit, Casa Sollievo della Sofferenza Hospital, IRCSS, San Giovanni Rotondo, Italy (3 probands) and University of Leuven, Belgium (1 proband).

<sup>C</sup> **RS:** reportedly sporadic; **NS:** not specified

<sup>D</sup> Exact age was used to calculate Height and Head Circumferences (HC), but provided as age-groups in Supporting Information Table S4: 0-24 months; 2-4 years; 5-8 years; 9-13 years; 14-18 years; 19-26 years; >26 years.

<sup>E</sup> **F:** female; **M:** male

<sup>F</sup> **W:** White

<sup>G</sup> An individual was classified as having a Noonan-like phenotype if at least two of the following features were present: short stature (SS), low set ears (LSE), hypertelorism (HTL), midface hypoplasia (MH), webbed neck (WN), pectus abnormality (PA) or pulmonic stenosis (PS).

<sup>H</sup> Height percentiles for Hispanic individuals were provided in square brackets to indicate that they were excluded from the data analysis on frequency of short or normal stature due to the lack of ethnic-specific growth charts.

<sup>I</sup> Comprehensive alphabetical list of all genes mentioned in Supporting Information Table S4: *NFI* (MIM# 613113) and *SPRED1* (MIM# 609291).

**Abbreviations:**

**NS:** not specified, i.e. no value provided on the phenotypic checklist; **UN:** unkown; **bil:** bilateral; **gr:** groin; **ax:** axillary; **CALMs:** café-au-lait macules; **OPG:** optic pathway glioma; **N, UN:** no symptomatic OPG or symptomatic spinal neurofibroma, unkown if any asymptomatic OPG or asymptomatic spinal neurofibromas are present; **N, MRI:** no symptomatic and asymptomatic OPG or spinal neurofibroma detected by MRI; **HTL:** hypertelorism; **WN:** short/webbed neck; **MH:** midface hypoplasia; **LSE:** low set ears; **LPH:** low posterior hairline; **SS:** short stature; **PA:** pectus abnormality; **PT:** ptosis; **PS:** pulmonic stenosis; **DPF:** downslanting palpebral fissures; **HC:** head circumference; **SD:** speech delay; **MRI:** magnetic resonance imaging..

**Supp. Table S5.** The classification of *NFI* missense variants affecting p.Met1149, p.Arg1276 and p.Lys1423 reported in the studied group according to the ACMG recommendations.

| Variant   | Protein      | PS1              | PS2 <sup>A</sup> | PS3              | PS4 | PM1 <sup>B</sup> | PM2 | PM3 | PM4 | PM5 <sup>C</sup> | PM6 <sup>D</sup> | PP1 <sup>E</sup> | PP2 | PP3 | PP4 <sup>F</sup> | PP5 <sup>G</sup>   | Variant classification <sup>H</sup> |
|-----------|--------------|------------------|------------------|------------------|-----|------------------|-----|-----|-----|------------------|------------------|------------------|-----|-----|------------------|--------------------|-------------------------------------|
| c.3445A>G | p.Met1149Val | N/A              | YES              | ?                | YES | ?                | NO  | N/A | N/A | N/A              | N/A              | YES              | ?   | NO  | YES              | YES <sup>1-3</sup> | Pathogenic → Pathogenic             |
| c.3445A>T | p.Met1149Leu | N/A              | N/A              | ?                | NO  | ?                | YES | N/A | N/A | YES              | N/A              | N/A              | ?   | NO  | YES <sup>1</sup> | NO                 | ? → VUS                             |
| c.3446T>C | p.Met1149Thr | N/A              | N/A              | ?                | YES | ?                | YES | N/A | N/A | YES              | YES              | N/A              | ?   | YES | YES              | NO                 | ? → Pathogenic                      |
| c.3447G>A | p.Met1149Ile | N/A              | N/A              | ?                | YES | ?                | YES | N/A | N/A | YES              | N/A              | YES              | ?   | NO  | YES <sup>1</sup> | YES <sup>1</sup>   | Pathogenic → Pathogenic             |
| c.3447G>C | p.Met1149Ile | YES              | N/A              | ?                | NO  | ?                | YES | N/A | N/A | YES              | N/A              | YES <sup>J</sup> | ?   | NO  | YES <sup>1</sup> | NO                 | ? → Pathogenic                      |
| c.3447G>T | p.Met1149Ile | YES              | N/A              | ?                | NO  | ?                | YES | N/A | N/A | YES              | N/A              | N/A              | ?   | NO  | YES              | YES <sup>3</sup>   | Pathogenic → Pathogenic             |
| c.3826C>G | p.Arg1276Gly | N/A              | YES              | YES <sup>K</sup> | YES | YES              | YES | N/A | N/A | N/A              | N/A              | N/A              | ?   | YES | YES              | YES <sup>1,2</sup> | Pathogenic → Pathogenic             |
| c.3827G>A | p.Arg1276Gln | N/A              | YES              | YES <sup>K</sup> | YES | YES              | NO  | N/A | N/A | N/A              | N/A              | YES              | ?   | YES | YES              | YES <sup>1-3</sup> | Pathogenic → Pathogenic             |
| c.3827G>C | p.Arg1276Pro | N/A              | N/A              | YES <sup>K</sup> | YES | YES              | YES | N/A | N/A | N/A              | N/A              | N/A              | ?   | YES | YES              | YES <sup>1,3</sup> | Pathogenic → Pathogenic             |
| c.3827G>T | p.Arg1276Leu | N/A              | N/A              | ?                | YES | YES              | YES | N/A | N/A | YES              | N/A              | N/A              | ?   | YES | NO               | NO                 | ? → Pathogenic                      |
| c.4267A>C | p.Lys1423Gln | N/A              | N/A              | YES <sup>K</sup> | YES | YES              | YES | N/A | N/A | YES              | YES              | N/A              | ?   | YES | YES              | NO                 | VUS → Pathogenic                    |
| c.4267A>G | p.Lys1423Glu | N/A              | YES              | YES <sup>K</sup> | YES | YES              | YES | N/A | N/A | N/A              | N/A              | N/A              | ?   | YES | YES              | YES <sup>1-3</sup> | Pathogenic → Pathogenic             |
| c.4268A>C | p.Lys1423Thr | N/A              | N/A              | ?                | YES | YES              | YES | N/A | N/A | YES              | N/A              | N/A              | ?   | YES | NO               | NO                 | ? → Pathogenic                      |
| c.4268A>G | p.Lys1423Arg | N/A <sup>L</sup> | YES              | YES <sup>K</sup> | YES | YES              | YES | N/A | YES | N/A              | N/A              | N/A              | ?   | YES | YES              | YES <sup>1,2</sup> | Pathogenic → Pathogenic             |
| c.4268A>T | p.Lys1423Met | N/A              | N/A              | ?                | NO  | YES              | YES | N/A | N/A | YES              | YES              | N/A              | ?   | YES | NO               | YES <sup>1</sup>   | Pathogenic → Likely pathogenic      |
| c.4269G>C | p.Lys1423Asn | N/A <sup>L</sup> | N/A              | YES <sup>K</sup> | YES | YES              | YES | N/A | YES | N/A              | N/A              | N/A              | ?   | YES | YES              | YES <sup>1,3</sup> | Pathogenic → Pathogenic             |
| c.4269G>T | p.Lys1423Asn | N/A <sup>L</sup> | YES              | YES <sup>K</sup> | YES | YES              | YES | N/A | YES | N/A              | N/A              | N/A              | ?   | YES | YES              | YES <sup>1,2</sup> | Pathogenic → Pathogenic             |

**PS1:** same amino acid change as a previously established pathogenic variant regardless of nucleotide change; **PS2:** proven *de novo* (both maternity and paternity confirmed); **PS3:** well-established functional studies; **PS4:** the prevalence of the variant in affected individuals is significantly increased compared to the prevalence in controls; **PM1:** located in a mutational hot spot and/or in critical functional domain; **PM2:** absent from controls; **PM3:** for recessive disorders, detected in *trans* with a pathogenic variant; **PM4:** protein length changes due to in-frame or stop-loss variants; **PM5:** novel missense change at amino acid residue where a different pathogenic missense change has been seen before; **PM6:** assumed *de novo*, but without confirmation of paternity and maternity; **PP1:** co-segregation with disease in multiple affected family members; **PP2:** missense variant in a gene that has a low rate of benign missense variation; **PP3:** multiple lines of computational evidence support a deleterious effect on the gene or gene product; **PP4:** individual's phenotype or family history is highly specific for a disease; **PP5:** reputable source reports variant as pathogenic; **N/A:** not applicable; **YES:** the criterion has been fulfilled; **NO:** the criterion has not been fulfilled; **?:** due to the lack of evidence, it is difficult to establish whether the criterion has been fulfilled or not

<sup>A</sup> based on the data from LOVD database (only individuals confirmed as *de novo* and identified in the Netherlands where biological relationships were confirmed as part of the *de novo* assessment have been taken into account); <sup>B</sup> only GRD domain (amino acids 1,217-1,511) has been proved to be critical to protein function, thus this evidence could be considered as moderate evidence of pathogenicity for the *NF1* missense variants affecting codons 1276 and 1423; <sup>C</sup> variants classified as *pathogenic* in the publicly available disease databases (HGMD, LOVD, ClinVar) have been taken into account; <sup>D</sup> only individuals confirmed as *de novo* at UAB have been taken into account, except for variants fulfilling the PS2 criterion (p.Met1149Val, p.Arg1276Gly, p.Arg1276Gln, p.Lys1423Glu, p.Lys1423Arg and p.Lys1423Asn); <sup>E</sup> segregation with at least three affected family members needed to fulfill this criterion; <sup>F</sup> at least one individual with "classic" NF1 phenotype, including neurofibroma(s) and/or Lisch nodules was considered required to fulfill this criterion; <sup>G</sup> based on the variant's classification as *pathogenic* reported in HGMD (1), LOVD (2) and/or ClinVar (3) databases (details in Supporting Information Tables S1-S3); <sup>H</sup> prior variants classification as reported in the publicly available disease databases (HGMD, LOVD, ClinVar) and *a posteriori* classification based on our study and following the ACMG recommendations (Richards et al., 2015); <sup>I</sup> individuals, carrying c.3445A>T (p.Met1149Leu), c.3447G>A (p.Met1149Ile) or c.3447G>C (p.Met1149Ile), presented only with pigmentary manifestations, that is, >5 CALMs and/or skinfold freckles; however, RASopathy NGS panel or *SPRED1* testing was negative (see details in Supporting Information Table S6); <sup>J</sup> segregation with only two affected family members, however, RASopathy NGS panel was negative, thus the proband's and the proband's mother phenotypes were highly specific for NF1 (see details in Supporting Information Table S6); <sup>K</sup> based on Pouillet et al. (1994), Klose et al. (1998) and/or Scheffzek and Welti (2012); <sup>L</sup> the variants c.4268A>G, c.4269G>C and c.4269G>T lead to skipping of exon 32 [24] during *NF1* mRNA splicing, r.4111\_4269del (p.Val1371\_Lys1423del) in all individuals referred to the UAB (see details in Supporting Information Table S4), thus these alterations should be classified as splicing variants *mimicking* a missense variant, not bona fide missense variants.

**To classify variant as pathogenic the following criteria need to be fulfilled:** ≥2 strong (PS1-PS4) OR 1 strong (PS1-PS4) and ≥3 moderate (PM1-PM6) OR 1 strong (PS1-PS4) and 2 moderate (PM1-PM6) and ≥2 supporting (PP1-PP5) OR 1 strong (PS1-PS4) and 1 moderate (PM1-PM6) and ≥4 supporting (PP1-PP5).

**To classify variant as likely pathogenic the following criteria need to be fulfilled:** 1 strong (PS1-PS4) and 1-2 moderate (PM1-PM6) OR 1 strong (PS1-PS4) and ≥2 supporting (PP1-PP5) OR ≥3 moderate (PM1-PM6) OR 2 moderate (PM1-PM6) and ≥2 supporting (PP1-PP5) OR 1 moderate (PM1-PM6) and ≥4 supporting (PP1-PP5).

Variant should be classified as **Variant of Uncertain Significance (VUS)** if other criteria are unmet or the criteria for benign and pathogenic are contradictory.

**Supp. Table S6.** Clinical details for 70 individuals with one of four different amino substitutions at *NFI* p.Met1149 from 51 different families.

Supp. Table S6 is included as a separate Excel file.

<sup>A</sup> For individuals with one asterisk (\*) the standardized phenotypic checklist forms were not re-verified/updated by the referring physicians, the data are based on the originally submitted forms; individuals with two asterisks (\*\*) had incomplete phenotypic checklist forms.

<sup>B</sup> **UAB:** University of Alabama at Birmingham (45 probands and 19 relatives); **EUR:** individuals referred by the European collaborators (6 probands), including Molecular Genetics Unit, Casa Sollievo della Sofferenza Hospital, IRCSS, San Giovanni Rotondo, Italy (3 probands), University of Padova, Italy (1 proband), University Hospital, Ghent, Belgium (1 proband) and University of Leuven, Belgium (1 proband).

<sup>C</sup> **F:** familial; **PrS:** proven sporadic; **RS:** reportedly sporadic; **NS:** not specified; **UN:** unknown

<sup>D</sup> Exact age was used to calculate Height and Head Circumferences (HC), but provided as age-groups in Supporting Information Table S6: 0-24 months; 2-4 years; 5-8 years; 9-13 years; 14-18 years; 19-26 years; >26 years.

<sup>E</sup> **F:** female; **M:** male.

<sup>F</sup> **W:** White; **His:** Hispanic; **AA:** African American; **As:** Asian; **O:** Other; **NA:** Native American.

<sup>G</sup> An individual was classified as having Noonan-like phenotype if at least two of the following features were present: short stature (SS), low set ears (LSE), hypertelorism (HTL), midface hypoplasia (MH), webbed neck (WN), ptosis (PT), downslanting palpebral fissures (DPF), pectus abnormality (PA) or pulmonic stenosis (PS).

<sup>H</sup> Height percentiles for Hispanic and Asian individuals were provided in square brackets to indicate that they were excluded from the data analysis on frequency of short or normal stature due to the lack of ethnic-specific growth charts.

<sup>I</sup> Individuals with ADD/ADHD, but normal development were still classified as normal.

<sup>J</sup> RASopathy panel performed at UAB included 17 genes: *NFI*, *SPRED1*, *PTPN11*, *PPP1CB*, *BRAF*, *CBL*, *HRAS*, *KRAS*, *NRAS*, *MAP2K1*, *MAP2K2*, *RAF1*, *RIT1*, *RASA2*, *SHOC2*, *SOS1* and *SOS2*.

<sup>K</sup> Comprehensive alphabetical list of all genes mentioned in Supporting Information Table S6: *ACTC1* (MIM# 102540), *A2ML1* (MIM# 610627), *BRAF* (MIM# 164757), *CAV3* (MIM# 601253), *CBL* (MIM# 165360), *GLA* (MIM# 300644), *HRAS* (MIM# 190020), *KAT6B* (MIM# 605880), *KRAS* (MIM# 190070), *LAMP2* (MIM# 309060), *MAP2K1* (MIM# 176872), *MAP2K2* (MIM# 601263), *MT-TG* (MIM# 590035), *MT-TI* (MIM# 590045), *MT-TK* (MIM# 590060), *MT-TQ* (MIM# 590030), *MYBPC3* (MIM# 600958), *MYH7* (MIM# 160760), *MYL2* (MIM# 160781), *MYL3* (MIM# 160790), *NFI* (MIM# 613113), *NRAS* (MIM# 164790), *PPP1CB* (MIM# 600590), *PRKAG2* (MIM# 602743), *PTPN11* (MIM# 176876), *RAF1* (MIM# 164760), *RASA2* (MIM# 601589), *RIT1* (MIM# 609591), *RRAS* (MIM# 165090), *SHOC2* (MIM# 602775), *SOS1* (MIM# 182530), *SOS2* (MIM# 601247), *SPRED1* (MIM# 609291), *TNNC1* (MIM# 191040), *TNNT2* (MIM# 191044), *TNNT3* (MIM# 191045), *TPM1* (MIM# 191010) and *TTR* (MIM# 176300).

<sup>L</sup> UAB-R1495, carrying c.3445A>T (p.Met1149Leu), was excluded from the genotype-phenotype study as the interpretation of this specific variant is “VUS” according to the ACMG recommendations (see details in Supporting Information Table S5).

**Abbreviations:** **NS:** not specified, i.e. no value provided on the phenotypic checklist; **UN:** unknown; **CALMs:** café-au-lait macules; **bil:** bilateral; **gr:** groin; **ax:** axillary; **sub:** submammary; **OPG:** optic pathway glioma; **N, UN:** no symptomatic OPG or symptomatic spinal neurofibroma, unknown if any asymptomatic OPG or asymptomatic spinal neurofibromas are present; **N, MRI:** no symptomatic and asymptomatic OPG or spinal neurofibroma detected by MRI; **HTL:** hypertelorism; **WN:** short/webbed neck; **MH:** midface hypoplasia; **LSE:** low set ears; **LPH:** low posterior hairline; **SS:** short stature; **PA:** pectus abnormality; **PT:** ptosis; **PS:** pulmonic stenosis; **DPF:** downslanting palpebral fissures; **HC:** head circumference; **ADD:** attention deficit disorder; **ADHD:** attention deficit hyperactivity disorder; **ID:** intellectual disability; **LD:** learning disability; **SD:** speech delay; **F:** father; **M:** mother; **S:** sibling; **C:** child; **FSIQ:** Full Scale Intelligence Quotient; **MRI:** magnetic resonance imaging; **NGS:** next generation sequencing; **VUS:** variant of uncertain significance.

**Supp. Table S7.** Spectrum of clinical features in individuals heterozygous for pathogenic *NF1* missense variants affecting p.Met1149.

| Pathogenic variant                                                              | c.3445A>G (p.Met1149Val) |                   |       | c.3446T>C (p.Met1149Thr) |      |     | c.3447G>A (p.Met1149Ile)<br>c.3447G>C (p.Met1149Ile)<br>c.3447G>T (p.Met1149Ile) |      |     | All pathogenic variants |       |       | Total              |
|---------------------------------------------------------------------------------|--------------------------|-------------------|-------|--------------------------|------|-----|----------------------------------------------------------------------------------|------|-----|-------------------------|-------|-------|--------------------|
|                                                                                 |                          |                   |       |                          |      |     |                                                                                  |      |     |                         |       |       |                    |
| Pathogenic variant positive individuals<br>(Proband:Relative)                   | 49<br>(38:11)            |                   |       | 7<br>(6:1)               |      |     | 13<br>(6:7)                                                                      |      |     | 69<br>(50:19)           |       |       | 69<br>(50:19)      |
| Age group, years                                                                | ≤8                       | 9-18              | ≥19   | ≤8                       | 9-18 | ≥19 | ≤8                                                                               | 9-18 | ≥19 | ≤8                      | 9-18  | ≥19   | all ages           |
| Total                                                                           | 16                       | 18                | 15    | 1                        | 1    | 5   | 6                                                                                | 2    | 5   | 23                      | 21    | 25    | 69                 |
| Proband:Relative                                                                | 15:1                     | 15:3              | 8:7   | 1:0                      | 1:0  | 4:1 | 2:4                                                                              | 1:1  | 3:2 | 18:5                    | 17:4  | 15:10 | 50:19              |
| Male: Female                                                                    | 9:7                      | 9:9               | 6:9   | 0:1                      | 0:1  | 2:3 | 6:0                                                                              | 1:1  | 3:2 | 15:8                    | 10:11 | 11:14 | 36:33              |
| Fulfilling the NIH criteria if the family history<br>is taken into account      | 10/16                    | 17/18             | 10/15 | 0/1                      | 0/1  | 3/5 | 5/6                                                                              | 2/2  | 4/5 | 15/23                   | 19/21 | 17/25 | 51/69              |
| Fulfilling the NIH criteria if solely taking the<br>physical signs into account | 8/16                     | 15/18             | 9/15  | 0/1                      | 0/1  | 1/5 | 3/6                                                                              | 1/2  | 3/5 | 11/23                   | 16/21 | 13/25 | 40/69              |
| >5 CALMs                                                                        | 15/16                    | 17/18             | 13/15 | 1/1                      | 1/1  | 3/5 | 5/6                                                                              | 2/2  | 5/5 | 21/23                   | 20/21 | 21/25 | 62/69              |
| Skinfold freckling                                                              | 8/14                     | 16/18             | 9/15  | 0/1                      | 0/1  | 0/3 | 3/6                                                                              | 1/2  | 3/5 | 11/21                   | 17/21 | 12/23 | 40/65              |
| Lisch nodules                                                                   | 0/11                     | 1/14              | 0/7   | 0/1                      | 0/1  | 1/3 | 0/3                                                                              | 0/2  | 1/2 | 0/15                    | 1/17  | 2/12  | 3/44               |
| Skeletal abnormalities <sup>A</sup>                                             | 1/14                     | 4/17              | 6/12  | 0/1                      | 0/1  | 1/4 | 2/6                                                                              | 1/2  | 0/4 | 3/21                    | 5/20  | 7/20  | 15/61              |
| Plexiform neurofibromas                                                         | 0/13                     | 0/16              | 0/14  | 0/1                      | 0/1  | 0/5 | 0/6                                                                              | 0/2  | 0/4 | 0/20                    | 0/19  | 0/23  | 0/62               |
| Cutaneous neurofibromas <sup>B</sup>                                            | 0/15                     | 0/17              | 3/15  | 0/1                      | 0/1  | 0/5 | 0/6                                                                              | 0/2  | 0/4 | 0/22                    | 0/20  | 3/24  | 3/66               |
| Subcutaneous neurofibromas <sup>B</sup>                                         | 0/14                     | 1/16              | 3/14  | 0/1                      | 0/1  | 0/5 | 0/6                                                                              | 0/2  | 0/3 | 0/21                    | 1/19  | 3/22  | 4/62               |
| Symptomatic spinal neurofibromas                                                | 0/12                     | 0/17 <sup>C</sup> | 0/13  | 0/0                      | 0/1  | 0/5 | 0/6                                                                              | 0/2  | 0/3 | 0/18                    | 0/20  | 0/21  | 0/59               |
| Symptomatic OPG <sup>D</sup>                                                    | 0/12                     | 0/17              | 0/13  | 0/1                      | 0/1  | 0/3 | 0/5                                                                              | 0/2  | 0/4 | 0/18                    | 0/20  | 0/20  | 0/58               |
| Asymptomatic OPG <sup>E</sup>                                                   | 0/4                      | 0/9               | 0/5   | 0/1                      | 0/0  | 0/0 | 0/1                                                                              | 0/2  | 0/1 | 0/6                     | 0/11  | 0/6   | 0/23               |
| Other neoplasms <sup>F</sup>                                                    | 0/11                     | 2/18              | 2/11  | 0/1                      | 0/1  | 0/3 | 0/5                                                                              | 0/2  | 2/5 | 0/17                    | 2/21  | 4/19  | 6/57               |
| Cognitive impairment and/or learning disabilities                               | 8/15                     | 11/18             | 6/13  | 1/1                      | 0/1  | 0/5 | 3/6                                                                              | 2/2  | 0/5 | 12/22                   | 13/21 | 6/23  | 31/66              |
| Noonan-like phenotype <sup>G</sup>                                              | 3/14                     | 5/17              | 5/14  | 0/1                      | 0/1  | 1/4 | 2/6                                                                              | 1/2  | 1/3 | 5/21                    | 6/20  | 7/21  | 18/62 <sup>H</sup> |
| Short stature <sup>I</sup>                                                      | 1/7                      | 3/14              | 0/8   | 0/1                      | 0/0  | 1/1 | 0/0                                                                              | 0/1  | 0/1 | 1/8                     | 3/15  | 1/10  | 5/33               |
| Macrocephaly                                                                    | 7/12                     | 7/14 <sup>J</sup> | 1/3   | 0/1                      | 0/0  | 1/4 | 1/5                                                                              | 1/2  | 1/4 | 8/18                    | 8/16  | 3/11  | 19/45              |
| Pulmonic stenosis                                                               | 0/12                     | 1/14              | 0/10  | 0/1                      | 0/1  | 1/4 | 0/6                                                                              | 0/2  | 0/2 | 0/19                    | 1/17  | 1/16  | 2/52               |
| Cardiovascular abnormalities <sup>K</sup>                                       | 1/12                     | 2/14              | 1/10  | 0/1                      | 0/1  | 1/4 | 0/6                                                                              | 0/2  | 0/2 | 1/19                    | 2/17  | 2/16  | 5/52               |

<sup>A</sup>All bone abnormalities included, that is, pectus abnormality (n=8), scoliosis (n=3), marfanoid habitus (n=1), genu valgum (n=1), sphenoid wing dysplasia (n=1), leg length discrepancy (n=1), clinodactyly (n=1) and exostosis (n=1), except for scoliotic attitude (“pseudoscoliosis”) observed in two individuals (EUR-R1 and EUR-R2, Supporting Information Table S6). <sup>B</sup>At least two cutaneous/subcutaneous neurofibromas were required to be considered as “positive for the criterion of neurofibromas”. <sup>C</sup>A possible spinal lesion was reported by MRI at T12 region of spine in a single 18-year-old individual (UAB-R2593, Supporting Information Table S6), however, this lesion requires the differential diagnosis between spinal neurofibroma and cyst. <sup>D</sup>The absence of symptomatic OPGs was determined by ophthalmological examination and/or by MRI. <sup>E</sup>Including only individuals without signs of symptomatic OPGs who underwent MRI examination. <sup>F</sup>All neoplasms, excluding OPGs and neurofibromas, included, that is, lipoma(s) (n=4), benign lesion in the right temporal lobe detected by MRI (n=1) and pilomatrixoma (n=1). <sup>G</sup>An individual was classified as having a Noonan-like phenotype when at least two of the following features were present: short stature, low set ears, hypertelorism, downslanting palpebral fissures, midface hypoplasia, ptosis, webbed neck, pectus abnormality and/or pulmonic stenosis. <sup>H</sup>Excluding five individuals with possible Noonan-like features, but further clinical details were not available. <sup>I</sup>As no specific growth curves are available for the Hispanic and Asian populations, Hispanic and Asian individuals were excluded as having short or normal stature. <sup>J</sup>Including a single individual (UAB-R2593) with head circumference PC97 classified as a macrocephaly. <sup>K</sup>All cardiovascular abnormalities included, that is, pulmonic stenosis (n=2), atrial septal defect (n=2), quadricuspid aortic valve (n=1) and hypertrophic cardiomyopathy (n=1).

**Supp. Table S8.** Noonan-like features in individuals heterozygous for pathogenic *NF1* missense variants affecting p.Met1149.

| ID <sup>A</sup>           | Pathogenic variant       | Family history | Age, years | CALMs | Freckles | Others                                                            | Noonan-like phenotype                                                                                                       |
|---------------------------|--------------------------|----------------|------------|-------|----------|-------------------------------------------------------------------|-----------------------------------------------------------------------------------------------------------------------------|
| UAB-R5694-S               | c.3445A>G (p.Met1149Val) | F              | <2         | <6    | -        | -                                                                 | MH, LSE, motor delay, SD                                                                                                    |
| <b>UAB-R58801FN.203</b>   | c.3445A>G (p.Met1149Val) | PrS            | <2         | >5    | +        | hydrocephalus                                                     | mild HTL, LPH, a slightly coarse look, macrocephaly                                                                         |
| UAB-R6393                 | c.3445A>G (p.Met1149Val) | UN             | 5-8        | >5    | +        | -                                                                 | <i>possible</i> : SS, LSE, macrocephaly                                                                                     |
| <b>EUR-R2</b>             | c.3445A>G (p.Met1149Val) | RS             | 5-8        | >5    | +        | sphenoid wing dysplasia, scoliotic attitude, atrial septal defect | DPF, coarse facial features, bulbous nasal tip, bitemporal narrowing, frontal bossing, high anterior hairline, macrocephaly |
| <b>UAB-R86801FN.103</b>   | c.3447G>C (p.Met1149Ile) | F              | 5-8        | >5    | +        | -                                                                 | HTL, PA                                                                                                                     |
| UAB-R2347                 | c.3447G>A (p.Met1149Ile) | F              | 5-8        | >5    | -        | a history of joint hypermobility, headaches                       | <i>possible</i> : SS, HTL, SD, LD                                                                                           |
| <b>UAB-R2347-S1</b>       | c.3447G>A (p.Met1149Ile) | F              | 5-8        | >5    | -        | a history of joint hypermobility, clinodactyly                    | PT, WN, PA, SD, LD                                                                                                          |
| UAB-R8931-S               | c.3445A>G (p.Met1149Val) | F              | 9-13       | >5    | +        | -                                                                 | mild PT, MH, HTL, LSE, DPF, fine motor delay, LD, macrocephaly                                                              |
| UAB-R7654-S               | c.3445A>G (p.Met1149Val) | F              | 9-13       | <6    | -        | -                                                                 | HTL, LSE, MH, macrocephaly                                                                                                  |
| UAB-R2347-S2              | c.3447G>A (p.Met1149Ile) | F              | 9-13       | >5    | -        | headaches, musculoskeletal aches and pains                        | HTL, DPF, PA, SD, LD                                                                                                        |
| <b>UAB-R8931</b>          | c.3445A>G (p.Met1149Val) | F              | 14-18      | >5    | +        | 2-6 subcutaneous neurofibromas, epilepsy                          | SS, PT, MH, HTL, LSE, DPF, bitemporal narrowing, narrow face, dolichocephaly, PA, LD, ADD, developmental delay              |
| <b>UAB-R7654</b>          | c.3445A>G (p.Met1149Val) | F              | 14-18      | >5    | +        | -                                                                 | HTL, LSE, WN, MH, LD, macrocephaly                                                                                          |
| UAB-R97601FN.203          | c.3445A>G (p.Met1149Val) | UN             | 14-18      | >5    | +        | marfanoid habitus, pilomatrixoma                                  | <i>possible</i> (no details provided), LD                                                                                   |
| EUR-R1                    | c.3445A>G (p.Met1149Val) | RS             | 14-18      | >5    | +        | scoliotic attitude                                                | PT, LSE, SD, LD                                                                                                             |
| <b>UAB-R5694-M</b>        | c.3445A>G (p.Met1149Val) | F              | 19-26      | >5    | +        | -                                                                 | HTL, LSE, WN, MH, abnormal development, LD, SD                                                                              |
| UAB-R8931-M               | c.3445A>G (p.Met1149Val) | F              | >26        | >5    | -        | -                                                                 | PT, MH, HTL, LSE, DPF, LD                                                                                                   |
| UAB-R0292-F               | c.3445A>G (p.Met1149Val) | UN             | >26        | >5    | +        | 2-6 cutaneous, subcutaneous and intradermal neurofibromas         | <i>possible</i> (no details provided), PA, abnormal development, LD                                                         |
| UAB-R7654-M               | c.3445A>G (p.Met1149Val) | NS             | >26        | <6    | -        | lipomas                                                           | HTL, LSE, MH                                                                                                                |
| <b>UAB-R9615</b>          | c.3445A>G (p.Met1149Val) | RS             | >26        | >5    | +        | -                                                                 | mild PT, DPF, short neck, wide-set nipples, PA, hypertrophic cardiomyopathy, macrocephaly, LD                               |
| <b>UAB-R4138</b>          | c.3445A>G (p.Met1149Val) | UN             | >26        | >5    | -        | seizure disorder                                                  | HTL, PT, LSE, frontal bossing                                                                                               |
| <b>EUR-R5</b>             | c.3446T>C (p.Met1149Thr) | F              | >26        | >5    | -        | -                                                                 | DPF, LSE, LPH, WN                                                                                                           |
| <b>UAB-R86801FN.103-M</b> | c.3447G>C (p.Met1149Ile) | F              | >26        | >5    | +        | -                                                                 | HTL, DPF                                                                                                                    |
| UAB-R2347-F               | c.3447G>A (p.Met1149Ile) | F              | >26        | >5    | -        | lipoma                                                            | <i>possible</i> : SS, HTL                                                                                                   |

<sup>A</sup> IDs of individuals with the negative RASopathy NGS panel were bolded (see details in Supporting Information Table S6).

**Abbreviations:** NS - not specified; UN - unknown; F - familial; RS - reportedly sporadic; PrS - proven sporadic; HTL - hypertelorism; WN - short/weighted neck; MH - midface hypoplasia; LSE - low set ears; LPH - low posterior hairline; SS - short stature; PA - pectus abnormality; PT - ptosis; PS - pulmonic stenosis; DPF - downslanting palpebral fissures; ADD - attention deficit disorder; ADHD - attention deficit hyperactivity disorder; LD - learning disability; SD - speech delay.

**Supp. Table S9.** Clinical characterization of individuals heterozygous for pathogenic *NFI* missense variants affecting p.Met1149 who did not fulfill the current NIH diagnostic criteria, based on physical features, not taking family history into account.

| ID <sup>A, B</sup> | Pathogenic variant          | Family history | Age, years | CALMs | Freckles | Lisch nodules | Neurofibromas | OPG    | Specific skeletal abnormalities <sup>C</sup> | NIH diagnostic criteria <sup>D</sup> |
|--------------------|-----------------------------|----------------|------------|-------|----------|---------------|---------------|--------|----------------------------------------------|--------------------------------------|
| <b>UAB-R5694-S</b> | c.3445A>G<br>(p.Met1149Val) | F              | <2         | <6    | -        | -             | -             | N, UN  | -                                            | 0/6                                  |
| <b>UAB-R7741-C</b> | c.3447G>T<br>(p.Met1149Ile) | F              | <2         | -     | -        | -             | -             | N, UN  | -                                            | 0/6                                  |
| UAB-R83811FN.205   | c.3445A>G<br>(p.Met1149Val) | RS             | 2-4        | >5    | -        | -             | -             | N, UN  | -                                            | 1/6                                  |
| UAB-R4191          | c.3446T>C<br>(p.Met1149Thr) | PrS            | 2-4        | >5    | -        | -             | -             | N, MRI | -                                            | 1/6                                  |
| UAB-R2347-S1       | c.3447G>A<br>(p.Met1149Ile) | F              | 5-8        | >5    | -        | -             | -             | N, UN  | -                                            | 1/6                                  |
| UAB-R9123-C        | c.3445A>G<br>(p.Met1149Val) | F              | 9-13       | >5    | -        | -             | -             | N, MRI | -                                            | 1/6                                  |
| UAB-R2347-S2       | c.3447G>A<br>(p.Met1149Ile) | F              | 9-13       | >5    | -        | -             | -             | N, MRI | -                                            | 1/6                                  |
| UAB-R1667          | c.3446T>C<br>(p.Met1149Thr) | PrS            | 14-18      | >5    | -        | -             | -             | N, UN  | -                                            | 1/6                                  |
| UAB-R56201FN.201   | c.3445A>G<br>(p.Met1149Val) | RS             | 19-26      | >5    | -        | -             | -             | N, MRI | -                                            | 1/6                                  |
| <b>UAB-R7654-M</b> | c.3445A>G<br>(p.Met1149Val) | NS             | >26        | <6    | -        | -             | -             | N, UN  | -                                            | 0/6                                  |
| <b>UAB-R5374</b>   | c.3445A>G<br>(p.Met1149Val) | RS             | >26        | -     | -        | -             | -             | N, UN  | -                                            | 0/6                                  |

<sup>A</sup> Of the 29 cases not fulfilling the NIH diagnostic criteria after excluding the family history, 11 had complete clinical information including the ophthalmological results for the presence/absence of Lisch nodules and symptomatic OPGs; <sup>B</sup> IDs of individuals with none of the diagnostic criteria of NF1 fulfilled were bolded; <sup>C</sup> Only skeletal abnormalities with sphenoid dysplasia or thinning of the long bone cortex with/without pseudarthrosis have been taken into account; <sup>D</sup> Only clinical features without the presence/absence of a first-degree relative that meets NIH criteria have been taken into account.

**Abbreviations:** F - familial; PrS - proven sporadic; RS - reportedly sporadic; NS - not specified; UN - unknown; CALMs - café-au-lait macules; OPG - optic pathway glioma; N, UN - no symptomatic OPG, unknown if any asymptomatic OPG is present; N, MRI - no symptomatic and asymptomatic OPG detected by MRI.

**Supp. Table S10.** Clinical details for 119 individuals with one of five different amino substitutions at *NF1* p.Arg1276 from 101 different families.

Supp. Table S10 is included as a separate Excel file.

<sup>A</sup> For individuals with one asterisk (\*) the standardized phenotypic checklist forms were not re-verified/updated by the referring physicians, the data are based on the originally submitted forms; individuals with two asterisks (\*\*) had incomplete phenotypic checklist forms.

<sup>B</sup> **UAB:** University of **A**labama at **B**irmingham (75 probands and 15 relatives); **EUR:** individuals referred by the **E**uropean collaborators (26 probands and 3 relatives), including Medical University of Innsbruck, Austria (2 probands and 1 relative), Hospital Universitario Ramón y Cajal, IRYCIS and CIBERER, Madrid, Spain (3 probands), Molecular Genetics Unit, Casa Sollievo della Sofferenza Hospital, IRCCS, San Giovanni Rotondo, Italy (1 proband), Carlo Besta Neurological Institute, IRCCS, Milan, Italy (5 probands and 1 relative), University of Padova, Italy (2 probands), University Hospital, Ghent, Belgium (7 probands and 1 relative) and University of Leuven, Belgium (6 probands).

<sup>C</sup> **F:** familial; **PrS:** proven sporadic; **RS:** reportedly sporadic; **NS:** not specified; **UN:** unknown

<sup>D</sup> Exact age was used to calculate Height and Head Circumferences (HC), but provided as age-groups in Supporting Information Table S10: 0-24 months; 2-4 years; 5-8 years; 9-13 years; 14-18 years; 19-26 years; >26 years.

<sup>E</sup> **F:** female; **M:** male

<sup>F</sup> **W:** White; **His:** Hispanic; **AA:** AfriAfrican American; **As:** Asian; **NaA:** Native American; **A:** AfriAfrican; **O:** Other

<sup>G</sup> An individual was classified as having Noonan-like phenotype if at least two of the following features were present: short stature (SS), low set ears (LSE), hypertelorism (HTL), midface hypoplasia (MH), webbed neck (WN), ptosis (PT), downslanting palpebral fissures (DPF), pectus abnormality (PA) or pulmonic stenosis (PS).

<sup>H</sup> Height percentiles for Hispanic and Asian individuals were provided in square brackets to indicate that they were excluded from the data analysis on frequency of short or normal stature due to the lack of ethnic-specific growth charts.

<sup>I</sup> Individuals with ADD/ADHD, but normal development were still classified as normal.

<sup>J</sup> RASopathy panel performed at UAB included 17 genes: *NF1*, *SPRED1*, *PTPN11*, *PPP1CB*, *BRAF*, *CBL*, *HRAS*, *KRAS*, *NRAS*, *MAP2K1*, *MAP2K2*, *RAF1*, *RITI*, *RASA2*, *SHOC2*, *SOS1* and *SOS2*.

<sup>K</sup> Comprehensive alphabetical list of all genes mentioned in Supporting Information Table S10: *A2ML1* (MIM# 610627), *ACTB* (MIM# 102630), *ACTG1* (MIM# 102560), *APC* (MIM# 611731), *BRAF* (MIM# 164757), *CBL* (MIM# 165360), *CDC42* (MIM# 116952), *EPHB4* (MIM# 600011), *HRAS* (MIM# 190020), *KAT6B* (MIM# 605880), *KRAS* (MIM# 190070), *LZTR1* (MIM# 600574), *MAP2K1* (MIM# 176872), *MAP2K2* (MIM# 601263), *MUTYH* (MIM# 604933), *NF1* (MIM# 613113), *NRAS* (MIM# 164790), *POLD1* (MIM# 174761), *POLE* (MIM# 174762), *PPP1CB* (MIM# 600590), *PTPN11* (MIM# 176876), *RAF1* (MIM# 164760), *RASA1* (MIM# 139150), *RASA2* (MIM# 601589), *RITI* (MIM# 609591), *RRAS* (MIM# 165090), *SH3BP2* (MIM# 602104), *SHOC2* (MIM# 602775), *SOS1* (MIM# 182530), *SOS2* (MIM# 601247) and *SPRED1* (MIM# 609291).

**Abbreviations:** **NS:** not specified, i.e. no value provided on the phenotypic checklist; **UN:** unknown; **CALMs:** café-au-lait macules; **bil:** bilateral; **gr:** groin; **ax:** axillary; **sub:** submammary; **OPG:** optic pathway glioma; **N, UN:** no symptomatic OPG or symptomatic spinal neurofibroma, unknown if any asymptomatic OPG or asymptomatic spinal neurofibromas are present; **N, MRI:** no symptomatic and asymptomatic OPG or spinal neurofibroma detected by MRI; **Y, MRI:** yes, presence of OPG or spinal neurofibroma confirmed by MRI; **HTL:** hypertelelorism; **WN:** short/webbed neck; **MH:** midface hypoplasia; **LSE:** low set ears; **LPH:** low posterior hairline; **SS:** short stature; **PA:** pectus abnormality; **PT:** ptosis; **PS:** pulmonic stenosis; **DPF:** downslanting palpebral fissures; **HC:** head circumference; **ADD:** attention deficit disorder; **ADHD:** attention deficit hyperactivity disorder; **ID:** intellectual disability; **LD:** learning disability; **SD:** speech delay; **F:** father; **M:** mother; **S:** sibling; **C:** child; **HS:** half-sibling; **N:** nephew; **aCGH:** array comparative genomic hybridization; **FSIQ:** Full Scale Intelligence Quotient; **MRI:** magnetic resonance imaging; **NGS:** next generation sequencing; **MPNST:** malignant peripheral nerve sheath tumor; **VUS:** variant of uncertain significance.



**Supp. Table S11.** Spectrum of clinical features in individuals heterozygous for pathogenic *NF1* missense variants affecting p.Arg1276.

| Pathogenic variant                                                           | c.3826C>G (p.Arg1276Gly) |      |     | c.3826_3827delinsGA (p.Arg1276Glu) |      |     | c.3827G>A (p.Arg1276Gln) |                   |       | c.3827G>C (p.Arg1276Pro) |      |     | c.3827G>T (p.Arg1276Leu) |      |     | All pathogenic variants |       |       | Total               |
|------------------------------------------------------------------------------|--------------------------|------|-----|------------------------------------|------|-----|--------------------------|-------------------|-------|--------------------------|------|-----|--------------------------|------|-----|-------------------------|-------|-------|---------------------|
| Pathogenic variant positive individuals (Proband:Relative)                   | 16 (14:2)                |      |     | 2 (1:1)                            |      |     | 93 (80:13)               |                   |       | 3 (3:0)                  |      |     | 5 (3:2)                  |      |     | 119 (101:18)            |       |       | 119 (101:18)        |
| Age group, years                                                             | ≤8                       | 9-18 | ≥19 | ≤8                                 | 9-18 | ≥19 | ≤8                       | 9-18              | ≥19   | ≤8                       | 9-18 | ≥19 | ≤8                       | 9-18 | ≥19 | ≤8                      | 9-18  | ≥19   | all ages            |
| Total                                                                        | 6                        | 4    | 6   | 1                                  | -    | 1   | 38                       | 25                | 30    | -                        | -    | 3   | 1                        | 2    | 2   | 46                      | 31    | 42    | 119                 |
| Proband:Relative                                                             | 5:1                      | 4:0  | 5:1 | 1:0                                | -    | 0:1 | 35:3                     | 23:2              | 22:8  | -                        | -    | 3:0 | 1:0                      | 2:0  | 0:2 | 42:4                    | 29:2  | 30:12 | 101:18              |
| Male: Female                                                                 | 1:5                      | 2:2  | 3:3 | 1:0                                | -    | 1:0 | 20:18                    | 16:9              | 15:15 | -                        | -    | 3:0 | 1:0                      | 1:1  | 2:0 | 23:23                   | 19:12 | 24:18 | 66:53               |
| Fulfilling the NIH criteria if the family history is taken into account      | 2/6                      | 4/4  | 6/6 | 1/1                                | -    | 1/1 | 26/36                    | 18/24             | 28/30 | -                        | -    | 3/3 | 0/1                      | 2/2  | 2/2 | 29/44                   | 24/30 | 40/42 | 93/116              |
| Fulfilling the NIH criteria if solely taking the physical signs into account | 2/6                      | 4/4  | 6/6 | 0/1                                | -    | 1/1 | 22/36                    | 16/24             | 28/30 | -                        | -    | 3/3 | 0/1                      | 2/2  | 2/2 | 24/44                   | 22/30 | 40/42 | 86/116              |
| >5 CALMs                                                                     | 4/6                      | 4/4  | 6/6 | 1/1                                | -    | 1/1 | 37/38                    | 22/25             | 28/30 | -                        | -    | 3/3 | 1/1                      | 2/2  | 2/2 | 43/46                   | 28/31 | 40/42 | 111/119             |
| Skinfold freckling                                                           | 1/6                      | 4/4  | 5/5 | 0/1                                | -    | 1/1 | 20/36                    | 17/22             | 19/29 | -                        | -    | 3/3 | 0/1                      | 2/2  | 2/2 | 21/44                   | 23/28 | 30/40 | 74/112              |
| Lisch nodules                                                                | 1/6                      | 0/3  | 1/3 | 0/1                                | -    | 1/1 | 6/24                     | 2/15              | 6/14  | -                        | -    | 2/2 | 0/0                      | 0/1  | 0/0 | 7/31                    | 2/19  | 10/20 | 19/70               |
| Skeletal abnormalities <sup>A</sup>                                          | 1/6                      | 0/3  | 1/5 | 0/1                                | -    | 0/0 | 9/33                     | 8/20              | 9/26  | -                        | -    | 2/3 | 0/1                      | 1/1  | 1/1 | 10/41                   | 9/24  | 13/35 | 32/100              |
| Plexiform neurofibromas                                                      | 0/4                      | 0/3  | 1/4 | 0/1                                | -    | 0/1 | 0/32                     | 1/24              | 12/26 | -                        | -    | 1/3 | 0/0                      | 0/1  | 0/2 | 0/37                    | 1/28  | 14/36 | 15/101              |
| Cutaneous neurofibromas <sup>B</sup>                                         | 0/4                      | 0/4  | 5/5 | 0/1                                | -    | 0/1 | 0/33                     | 1/23              | 8/29  | -                        | -    | 1/3 | 0/0                      | 0/2  | 0/2 | 0/38                    | 1/29  | 14/40 | 15/107              |
| Subcutaneous neurofibromas <sup>B</sup>                                      | 0/2                      | 0/4  | 0/2 | 0/1                                | -    | 1/1 | 0/32                     | 1/23              | 18/29 | -                        | -    | 2/3 | 0/0                      | 0/1  | 0/2 | 0/35                    | 1/28  | 21/37 | 22/100              |
| Symptomatic spinal neurofibromas                                             | 0/3                      | 1/3  | 1/4 | 0/1                                | -    | 0/1 | 0/30                     | 0/22 <sup>C</sup> | 15/27 | -                        | -    | 1/2 | 0/0                      | 0/2  | 0/2 | 0/34                    | 1/27  | 17/36 | 18/97               |
| Symptomatic OPG <sup>D</sup>                                                 | 0/5                      | 0/3  | 0/5 | 0/1                                | -    | 0/0 | 0/33                     | 0/20              | 0/24  | -                        | -    | 0/2 | 0/0                      | 0/2  | 0/2 | 0/39                    | 0/25  | 0/33  | 0/97                |
| Asymptomatic OPG <sup>E</sup>                                                | 0/2                      | 1/2  | 0/4 | 0/1                                | -    | 0/0 | 0/14                     | 0/8               | 0/16  | -                        | -    | 0/1 | 0/0                      | 0/0  | 0/0 | 0/17                    | 1/10  | 0/21  | 1/48                |
| Other neoplasms <sup>F</sup>                                                 | 0/5                      | 0/3  | 3/5 | 0/1                                | -    | 0/1 | 0/30                     | 2/18              | 2/26  | -                        | -    | 1/3 | 0/0                      | 0/0  | 0/2 | 0/36                    | 2/21  | 6/37  | 8/94                |
| Cognitive impairment and/or learning disabilities                            | 4/6                      | 3/4  | 2/5 | 0/1                                | -    | 0/0 | 12/36                    | 14/22             | 6/23  | -                        | -    | 1/3 | 1/1                      | 2/2  | 1/2 | 17/44                   | 19/28 | 10/33 | 46/105              |
| Noonan-like phenotype <sup>G</sup>                                           | 1/6                      | 1/4  | 0/4 | 0/1                                | -    | 0/0 | 10/36                    | 7/23              | 3/25  | -                        | -    | 0/3 | 0/1                      | 0/2  | 0/1 | 11/44                   | 8/29  | 3/33  | 22/106 <sup>H</sup> |
| Short stature <sup>I</sup>                                                   | 0/5                      | 1/4  | 0/3 | 0/1                                | -    | 0/0 | 6/25                     | 4/17              | 3/21  | -                        | -    | 0/2 | 0/0                      | 0/1  | 0/1 | 6/31                    | 5/22  | 3/27  | 14/80               |
| Macrocephaly                                                                 | 3/5                      | 1/4  | 0/2 | 0/1                                | -    | 0/0 | 12/30 <sup>J</sup>       | 5/16              | 3/14  | -                        | -    | 0/1 | 0/1                      | 0/1  | 0/1 | 15/37                   | 6/21  | 3/18  | 24/76               |
| Pulmonic stenosis                                                            | 1/6                      | 0/3  | 0/5 | 0/0                                | -    | 0/0 | 6/32                     | 2/15              | 2/25  | -                        | -    | 0/2 | 0/1                      | 0/1  | 0/2 | 7/39                    | 2/19  | 2/34  | 11/92               |
| Cardiovascular abnormalities <sup>K</sup>                                    | 1/6                      | 0/3  | 2/5 | 0/0                                | -    | 0/0 | 9/32                     | 4/15              | 5/25  | -                        | -    | 0/2 | 0/1                      | 0/1  | 1/2 | 10/39                   | 4/19  | 8/34  | 22/92               |

<sup>A</sup> All bone abnormalities included, that is, scoliosis (n=17), pectus abnormality (n=13), sphenoid wing dysplasia (n=2), leg or limb length discrepancy (n=2), marfanoid habitus (n=1), kyphosis (n=1), cherubism (n=1) and osteoporosis (n=1). <sup>B</sup> At least two cutaneous/subcutaneous neurofibromas were required to be considered as “positive for the criterion of neurofibromas”. <sup>C</sup> Excluding two individuals (UAB-R0843 and UAB-R7373) with possible symptomatic spinal neurofibromas, but no further clinical details available. <sup>D</sup> The absence of symptomatic OPGs was determined by ophthalmological examination and/or by MRI. <sup>E</sup> Including only individuals without signs of symptomatic OPGs who underwent MRI examination. <sup>F</sup> All neoplasms, excluding OPGs and neurofibromas, included, that is, astrocytoma (n=2), other glioma than OPG (n=1), pheochromocytoma (n=1), MPNST (n=1), colon cancer (n=1), meningioma (n=1), lipoma (n=1) and supratentorial anaplastic ependymoma (n=1). <sup>G</sup> An individual was classified as having Noonan-like phenotype when at least two of the following features were present: short stature, low set ears, hypertelorism, downslanting palpebral fissures, midface hypoplasia, ptosis, webbed neck, pectus abnormality and/or pulmonic stenosis. <sup>H</sup> Excluding 14 individuals with possible Noonan-like features, but further clinical details were not available. <sup>I</sup> As no specific growth curves are available for the Hispanic and Asian populations, Hispanic and Asian individuals were excluded as having short or normal stature. <sup>J</sup> Including a single individual (UAB-R9514) with head circumference PC97 classified as a macrocephaly. <sup>K</sup> All cardiovascular abnormalities included, that is, pulmonic stenosis (n=11), hypertension (n=5), aortic stenosis (n=4), aortic septal defect (n=2), myocardial infarction (n=1), Moya moya disease (n=1), left middle aortic stenosis (=1), hypertrophic cardiomyopathy (n=1), ventricular septal defect (n=1), tricuspid artesia (n=1), hypoplastic right heart syndrome (n=1), renal artery stenosis (n=1), left ventricular hypertrophy (n=1), carotid artery stenosis (n=1), coronary disease (n=1), atrial fibrillation (n=1) and stroke (n=1).

**Supp. Table S12.** Clinical details for 94 individuals with one of four different amino substitutions at *NFI* p.Lys1423 from 87 different families.

Supp. Table S12 is included as a separate Excel file.

<sup>A</sup> For individuals with one asterisk (\*) the standardized phenotypic checklist forms were not re-verified/updated by the referring physicians, the data are based on the originally submitted forms; individuals with two asterisks (\*\*) had incomplete phenotypic checklist forms.

<sup>B</sup> **UAB:** University of Alabama at Birmingham (64 probands and 2 relatives); **EUR:** individuals referred by the European collaborators (23 probands and 5 relatives), including Medical University of Innsbruck, Austria (3 probands and 1 relative), Hospital Universitario Ramón y Cajal, IRYCIS and CIBERER, Madrid, Spain (2 probands), Molecular Genetics Unit, Casa Sollievo della Sofferenza Hospital, IRCSS, San Giovanni Rotondo, Italy (7 probands and 3 relatives), Carlo Besta Neurological Institute, IRCSS, Milan, Italy (5 probands), University of Padova, Italy (3 probands), University Hospital, Ghent, Belgium (2 probands and 1 relative) and University of Leuven, Belgium (1 proband).

<sup>C</sup> **F:** familial; **PrS:** proven sporadic; **RS:** reportedly sporadic; **NS:** not specified; **UN:** unknown

<sup>D</sup> Exact age was used to calculate Height and Head Circumferences (HC), but provided as age-groups in Supporting Information Table S12: 0-24 months; 2-4 years; 5-8 years; 9-13 years; 14-18 years; 19-26 years; >26 years.

<sup>E</sup> **F:** female; **M:** male

<sup>F</sup> **W:** White; **His:** Hispanic; **AA:** African American; **As:** Asian; **NaA:** Native American; **O:** Other

<sup>G</sup> An individual was classified as having „Noonan-like” phenotype if at least two of the following features were present: short stature (SS), low set ears (LSE), hypertelorism (HTL), midface hypoplasia (MH), webbed neck (WN), ptosis (PT), downslanting palpebral fissures (DPF), pectus abnormality (PA) or pulmonic stenosis (PS).

<sup>H</sup> Height percentiles for Hispanic and Asian individuals were provided in square brackets to indicate that they were excluded from the data analysis on frequency of short or normal stature due to the lack of ethnic-specific growth charts.

<sup>I</sup> Individuals with ADD/ADHD, but normal development were still classified as normal.

<sup>J</sup> RASopathy panel performed at UAB included 17 genes: *NFI*, *SPRED1*, *PTPN11*, *PPP1CB*, *BRAF*, *CBL*, *HRAS*, *KRAS*, *NRAS*, *MAP2K1*, *MAP2K2*, *RAF1*, *RITI*, *RASA2*, *SHOC2*, *SOS1* and *SOS2*.

<sup>K</sup> Comprehensive alphabetical list of all genes mentioned in Supporting Information Table S12: *A2ML1* (MIM# 610627), *BRAF* (MIM# 164757), *CBL* (MIM# 165360), *CDC42* (MIM# 116952), *HRAS* (MIM# 190020), *IDH1* (MIM# 147700), *KRAS* (MIM# 190070), *LZTR1* (MIM# 600574), *MAP2K1* (MIM# 176872), *MAP2K2* (MIM# 601263), *NFI* (MIM# 613113), *NRAS* (MIM# 164790), *PPP1CB* (MIM# 600590), *PTPN11* (MIM# 176876), *RAF1* (MIM# 164760), *RASA1* (MIM# 139150), *RASA2* (MIM# 601589), *RITI* (MIM# 609591), *RRAS* (MIM# 165090), *SHOC2* (MIM# 602775), *SOS1* (MIM# 182530), *SOS2* (MIM# 601247) and *SPRED1* (MIM# 609291).

<sup>L</sup> UAB-R1753, carrying c.4268A>T (p.Lys1423Met), was excluded from the genotype-phenotype study as the interpretation of this specific variant is “likely pathogenic” according to the ACMG recommendations (see details in Supporting Information Table S5).

**Abbreviations:** **NS:** not specified, i.e. no value provided on the phenotypic checklist; **UN:** unknown; **CALMs:** café-au-lait macules; **bil:** bilateral; **gr:** groin; **ax:** axillary; **sub:** submammary; **OPG:** optic pathway glioma; **N, UN:** no symptomatic OPG or symptomatic spinal neurofibroma, unknown if any asymptomatic OPG or asymptomatic spinal neurofibromas are present; **N, MRI:** no symptomatic and asymptomatic OPG or spinal neurofibroma detected by **MRI**; **Y, MRI:** yes, presence of OPG or spinal neurofibroma confirmed by **MRI**; **HTL:** hypertelorism; **WN:** short/webbed neck; **MH:** midface hypoplasia; **LSE:** low set ears; **LPH:** low posterior hairline; **SS:** short stature; **PA:** pectus abnormality; **PT:** ptosis; **PS:** pulmonic stenosis; **DPF:** downslanting palpebral fissures; **HC:** head circumference; **ADD:** attention deficit disorder; **ADHD:** attention deficit hyperactivity disorder; **LD:** learning disability; **SD:** speech delay; **M:** mother; **S:** sibling; **C:** child; **FSIQ:** Full Scale Intelligence Quotient; **MRI:** magnetic resonance imaging; **NGS:** next generation sequencing; **PNST:** peripheral nerve sheath tumor.

**Supp. Table S13.** Spectrum of clinical features in individuals heterozygous for the *NFI* missense pathogenic variants affecting p.Lys1423.

| Pathogenic variant                                                           | c.4267A>C (p.Lys1423Gln) |      |     | c.4267A>G (p.Lys1423Glu) |       |       | c.4268A>C (p.Lys1423Thr) |      |     | All pathogenic variants |       |       | Total              |
|------------------------------------------------------------------------------|--------------------------|------|-----|--------------------------|-------|-------|--------------------------|------|-----|-------------------------|-------|-------|--------------------|
| Pathogenic variant positive individuals (Proband:Relative)                   | 7 (7:0)                  |      |     | 84 (77:7)                |       |       | 2 (2:0)                  |      |     | 93 (86:7)               |       |       | 93 (86:7)          |
| Age group, years                                                             | ≤8                       | 9-18 | ≥19 | ≤8                       | 9-18  | ≥19   | ≤8                       | 9-18 | ≥19 | ≤8                      | 9-18  | ≥19   | <b>all ages</b>    |
| Total                                                                        | 3                        | 2    | 2   | 32                       | 21    | 31    | 1                        | 1    | -   | 36                      | 24    | 33    | 93                 |
| Proband:Relative                                                             | 3:0                      | 2:0  | 2:0 | 32:0                     | 20:1  | 25:6  | 1:0                      | 1:0  | -   | 36:0                    | 23:1  | 27:6  | 86:7               |
| Male: Female                                                                 | 1:2                      | 1:1  | 0:2 | 17:15                    | 13:8  | 15:16 | 1:0                      | 1:0  | -   | 19:17                   | 15:9  | 15:18 | 49:44              |
| Fulfilling the NIH criteria if the family history is taken into account      | 2/2                      | 2/2  | 2/2 | 21/29                    | 21/21 | 31/31 | 1/1                      | 1/1  | -   | 24/32                   | 24/24 | 33/33 | 81/89              |
| Fulfilling the NIH criteria if solely taking the physical signs into account | 2/2                      | 2/2  | 2/2 | 18/29                    | 20/21 | 31/31 | 1/1                      | 0/1  | -   | 21/32                   | 22/24 | 33/33 | 76/89              |
| >5 CALMs                                                                     | 2/2                      | 2/2  | 2/2 | 27/31                    | 21/21 | 30/31 | 1/1                      | 1/1  | -   | 30/34                   | 24/24 | 32/33 | 86/91              |
| Skinfold freckling                                                           | 2/2                      | 2/2  | 2/2 | 19/29                    | 17/21 | 22/28 | 1/1                      | 0/0  | -   | 22/32                   | 19/23 | 24/30 | 65/85              |
| Lisch nodules                                                                | 0/1                      | 0/1  | 0/1 | 6/21                     | 6/13  | 19/22 | 0/0                      | 0/0  | -   | 6/22                    | 6/14  | 19/23 | 31/59              |
| Skeletal abnormalities <sup>A</sup>                                          | 0/3                      | 0/2  | 2/2 | 7/28                     | 12/21 | 13/25 | 0/1                      | 0/1  | -   | 7/32                    | 12/24 | 15/27 | 34/83              |
| Plexiform neurofibromas                                                      | 0/3                      | 0/2  | 1/1 | 4/27                     | 6/19  | 8/25  | 0/1                      | 0/1  | -   | 4/31                    | 6/22  | 9/26  | 19/79              |
| Cutaneous neurofibromas <sup>B</sup>                                         | 0/2                      | 0/2  | 1/1 | 3/27                     | 2/19  | 22/27 | 0/1                      | 0/1  | -   | 3/30                    | 2/22  | 23/28 | 28/80              |
| Subcutaneous neurofibromas <sup>B</sup>                                      | 0/1                      | 0/2  | 0/1 | 3/26                     | 1/18  | 13/22 | 0/0                      | 0/1  | -   | 3/27                    | 1/21  | 13/23 | 17/71              |
| Symptomatic spinal neurofibromas                                             | 0/2                      | 0/2  | 0/1 | 2/23                     | 0/14  | 1/21  | 0/1                      | 0/1  | -   | 2/26                    | 0/17  | 1/22  | 3/65               |
| Symptomatic OPG <sup>C</sup>                                                 | 0/3                      | 0/2  | 0/1 | 0/21                     | 0/20  | 1/25  | 0/1                      | 0/1  | -   | 0/25                    | 0/23  | 1/26  | 1/74               |
| Asymptomatic OPG <sup>D</sup>                                                | 0/2                      | 0/1  | 0/1 | 1/8                      | 4/13  | 1/14  | 0/0                      | 0/1  | -   | 1/10                    | 4/15  | 1/15  | 6/40               |
| Other neoplasms <sup>E</sup>                                                 | 0/3                      | 0/2  | 1/1 | 1/24                     | 1/18  | 8/27  | 0/1                      | 0/1  | -   | 1/28                    | 1/21  | 9/28  | 11/77              |
| Cognitive impairment and/or learning disabilities                            | 1/3                      | 1/2  | 1/2 | 14/31                    | 13/19 | 6/28  | 0/1                      | 0/1  | -   | 15/35                   | 14/22 | 7/30  | 36/87              |
| Noonan-like phenotype <sup>F</sup>                                           | 0/3                      | 1/2  | 0/1 | 10/30                    | 8/19  | 4/27  | 1/1                      | 0/0  | -   | 11/34                   | 9/21  | 4/28  | 24/83 <sup>G</sup> |
| Short stature <sup>H</sup>                                                   | 0/0                      | 0/1  | 1/1 | 5/15                     | 5/15  | 10/19 | 0/0                      | 0/0  | -   | 5/15                    | 5/16  | 11/20 | 21/51              |
| Macrocephaly                                                                 | 0/1                      | 0/0  | 0/1 | 4/18                     | 5/14  | 6/16  | 0/1                      | 0/0  | -   | 4/20                    | 5/14  | 6/17  | 15/51              |
| Pulmonic stenosis                                                            | 1/3                      | 0/2  | 0/1 | 4/24                     | 5/20  | 1/25  | 0/0                      | 0/1  | -   | 5/27                    | 5/23  | 1/26  | 11/76              |
| Cardiovascular abnormalities <sup>I</sup>                                    | 1/3                      | 0/2  | 0/1 | 5/24                     | 8/20  | 5/25  | 0/0                      | 0/1  | -   | 6/27                    | 8/23  | 5/26  | 19/76              |

<sup>A</sup> All bone abnormalities included, that is, scoliosis (n=17), pectus abnormality (n=10), pes planus (n=3), kyphosis (n=2), bone cysts (n=2), lordosis (n=1), sphenoid wing dysplasia (n=1), long bone dysplasia (n=1), cubitus valgus (n=1), osteoporosis (n=1), dysplastic vertebrae (n=1) and pseudoarthrosis (n=1). <sup>B</sup> At least two cutaneous/subcutaneous neurofibromas were required to be considered as “positive for the criterion of neurofibromas”. <sup>C</sup> The absence of symptomatic OPGs was determined by ophthalmological examination and/or by MRI. <sup>D</sup> Including only individuals without signs of symptomatic OPGs who underwent MRI examination. <sup>E</sup> All neoplasms, excluding OPGs and neurofibromas, included, that is, non-ossifying fibromas (n=3), giant cell tumor (n=1), rhabdomyosarcoma (n=1), peripheral nerve sheath tumor (n=1), colon adenocarcinoma (n=1), meningioma (n=1), cerebellar glioblastoma (n=1), pilocytic astrocytoma (n=1), hypothalamic glioma (n=2), low grade glioma (n=2) and brainstem glioma (n=1). <sup>F</sup> An individual was classified as having Noonan-like phenotype when at least two of the following features were present: short stature, low set ears, hypertelorism, downslanting palpebral fissures, midface hypoplasia, ptosis, webbed neck, pectus abnormality and/or pulmonic stenosis. <sup>G</sup> Excluding three individuals with possible Noonan-like features, but further clinical details were not available. <sup>H</sup> As no specific growth curves are available for the Hispanic and Asian populations, Hispanic and Asian individuals were excluded as having short or normal stature. <sup>I</sup> All cardiovascular abnormalities included, that is, pulmonic stenosis (n=11), hypertension (n=2), ventricular septal defect (n=2), Moya moya disease, mitral valve anomaly, aortic stenosis, Wolff-Parkinson-White syndrome, dilated ventricles, bicuspid aortic valve, aortic regurgitation, aortic root dilatation and parachute deformity of mitral valve (all observed in a single individual).

**Supp. Table S14.** Spinal neurofibromas in individuals heterozygous for pathogenic *NF1* missense variants affecting p.Arg1276.

| ID <sup>A</sup>                         | Pathogenic variant          | Family history | Age, years | CALMs | Freckles | Neurofibromas                                                                                           | Others                                                           | Comments                                                                                                                                                                                   |
|-----------------------------------------|-----------------------------|----------------|------------|-------|----------|---------------------------------------------------------------------------------------------------------|------------------------------------------------------------------|--------------------------------------------------------------------------------------------------------------------------------------------------------------------------------------------|
| <b>SYMPTOMATIC SPINAL NEUROFIBROMAS</b> |                             |                |            |       |          |                                                                                                         |                                                                  |                                                                                                                                                                                            |
| <b>UAB-R0193</b>                        | c.3826C>G<br>(p.Arg1276Gly) | F              | 14-18      | >5    | +        | -                                                                                                       | possible Noonan-like phenotype                                   | tumors on all spinal nerve roots                                                                                                                                                           |
| EUR-R10                                 | c.3826C>G<br>(p.Arg1276Gly) | RS             | 19-26      | >5    | +        | internal plexiform and 6-99 cutaneous neurofibromas                                                     | Lisch nodules, MPNST                                             | bilateral in cervical C1-8, thoracic T1-12, lumbar L1-5 and sacral S1-6 nerves                                                                                                             |
| UAB-R0306                               | c.3827G>A<br>(p.Arg1276Gln) | PrS            | 19-26      | >5    | +        | multiple internal plexiform and subcutaneous neurofibromas                                              | Lisch nodules, ADD, ADHD, LD, cherubism, severe osteoporosis, SS | unilateral tumors in T10-S5 regions                                                                                                                                                        |
| UAB-R492                                | c.3827G>A<br>(p.Arg1276Gln) | NS             | 19-26      | +     | +        | plexiform neurofibromas and multiple cutaneous/subcutaneous neurofibromas                               | cystic lesion                                                    | <u>spine MRI</u> : diffuse extensive involvement of neurofibromas along the course of the peripheral nerves                                                                                |
| EUR-R22                                 | c.3827G>A<br>(p.Arg1276Gln) | F              | 19-26      | >5    | +        | plexiform neurofibroma, ~30 cutaneous and 6-99 subcutaneous neurofibromas                               | Lisch nodules, pectus excavatum                                  | bilateral tumors on all spinal nerve roots                                                                                                                                                 |
| EUR-R28                                 | c.3827G>A<br>(p.Arg1276Gln) | F              | 19-26      | >5    | +        | internal plexiform and 2-6 subcutaneous neurofibromas, <i>histopathologically confirmed</i>             | Lisch nodules, cysts in brain, nevi/lentiginosities              | cervical C1-2 and C7, thoracic T1 and T11-12, lumbar L1-5 and sacral S1-5 nerves, <i>histopathologically confirmed</i>                                                                     |
| <b>UAB-R7942</b>                        | c.3827G>A<br>(p.Arg1276Gln) | F              | >26        | >5    | +        | internal plexiform and >500 subcutaneous neurofibromas                                                  | SS                                                               | bilateral tumors on all spinal nerve roots                                                                                                                                                 |
| UAB-R0215-F                             | c.3827G>A<br>(p.Arg1276Gln) | F              | >26        | >5    | +        | -                                                                                                       | headaches with dizziness, joint stiffness, morbid obesity        | multiple tumors; individual had pain at multiple sites (lower back, right knee and chest)                                                                                                  |
| UAB-R1256-M                             | c.3827G>A<br>(p.Arg1276Gln) | F              | >26        | >5    | +        | 2-6 cutaneous, 2-6 subcutaneous and 2-6 intradermal neurofibromas, <i>histopathologically confirmed</i> | scoliosis, aortic septal defect, LD, speech therapy              | bilateral tumors in thoracic nerves                                                                                                                                                        |
| UAB-R01611FN.104                        | c.3827G>A<br>(p.Arg1276Gln) | UN             | >26        | -     | -        | internal plexiform and 2-6 subcutaneous neurofibromas                                                   | -                                                                | cervical and lumbar nerves, <i>histopathologically confirmed</i>                                                                                                                           |
| <b>UAB-R743</b>                         | c.3827G>A<br>(p.Arg1276Gln) | NS             | >26        | <6    | -        | multiple internal plexiform and subcutaneous neurofibromas                                              | LD                                                               | tumors on all spinal nerve roots, <i>histopathologically confirmed</i> ; individual had pain and weakness of arms and legs, increasing over the years; case reported by Korf et al. (2005) |
| <b>UAB-R743-N</b>                       | c.3827G>A<br>(p.Arg1276Gln) | F              | >26        | >5    | +        | multiple internal plexiform and subcutaneous neurofibromas, <i>histopathologically confirmed</i>        | -                                                                | individual had pain and weakness of the left leg; a single lesion was surgically removed and <i>histopathologically confirmed</i> ; case reported by Korf et al. (2005)                    |
| <b>EUR-R21-F</b>                        | c.3827G>A<br>(p.Arg1276Gln) | RS             | >26        | >5    | +        | 6-99 subcutaneous neurofibromas, <i>histopathologically confirmed</i>                                   | hypertension, colonic polyps, colon cancer, macrocephaly         | bilateral, tumors in cervical C1-8, thoracic T1-12, lumbar L1-5 and sacral S1-5 nerves, <i>histopathologically confirmed</i>                                                               |

| <b>SYMPTOMATIC SPINAL NEUROFIBROMAS</b>  |                             |     |       |    |    |                                                                                                        |                                                                                                         |                                                                                                                                      |
|------------------------------------------|-----------------------------|-----|-------|----|----|--------------------------------------------------------------------------------------------------------|---------------------------------------------------------------------------------------------------------|--------------------------------------------------------------------------------------------------------------------------------------|
| EUR-R22-F                                | c.3827G>A<br>(p.Arg1276Gln) | F   | >26 † | >5 | +  | ~20 cutaneous and 6-99<br>subcutaneous neurofibromas                                                   | -                                                                                                       | diffuse symmetrical tumors along cervical and thoracic<br>nerves; individual died at age of 69 due to the subarachnoid<br>hemorrhage |
| EUR-R26                                  | c.3827G>A<br>(p.Arg1276Gln) | F   | >26   | >5 | -  | -                                                                                                      | scoliosis, osteopenia, hypertension,<br>pulmonic stenosis, <i>possible</i><br>Noonan-like phenotype, SS | tumors in cervical C4, thoracic T2, lumbar L2 and sacral<br>S1 nerves                                                                |
| EUR-R27                                  | c.3827G>A<br>(p.Arg1276Gln) | PrS | >26   | >5 | -  | 2-6 subcutaneous neurofibromas,<br><i>histopathologically confirmed</i>                                | -                                                                                                       | tumors in cervical C2-3 and C7, thoracic T1, lumbar and<br>sacral nerves, <i>histopathologically confirmed</i>                       |
| EUR-R29                                  | c.3827G>A<br>(p.Arg1276Gln) | RS  | >26   | >5 | NS | NS                                                                                                     | individual was operated at age of<br>~30 year due to posterior<br>mediastinum neurofibromas             | tumors in lumbar and sacral nerves                                                                                                   |
| EUR-R32                                  | c.3827G>C<br>(p.Arg1276Pro) | RS  | >26   | >5 | +  | 100-500 cutaneous, 6-99<br>subcutaneous and 2-6 intradermal<br>neurofibromas                           | Lisch nodules, scoliosis,<br>pheochromocytoma                                                           | diffuse symmetrical tumors along all spinal roots,<br><i>histopathologically confirmed</i>                                           |
| <b>ASYMPTOMATIC SPINAL NEUROFIBROMAS</b> |                             |     |       |    |    |                                                                                                        |                                                                                                         |                                                                                                                                      |
| UAB-R0522                                | c.3827G>A<br>(p.Arg1276Gln) | F   | 19-26 | >5 | +  | 2-6 cutaneous neurofibromas                                                                            | -                                                                                                       | tumors on all spinal nerve roots                                                                                                     |
| <b>EUR-R17</b>                           | c.3827G>A<br>(p.Arg1276Gln) | RS  | >26   | >5 | -  | 2-6 intradermal neurofibromas                                                                          | -                                                                                                       | tumors in cervical C3-7, thoracic T1-2 and T10-12 and<br>lumbar L1-3 nerves                                                          |
| EUR-R23                                  | c.3827G>A<br>(p.Arg1276Gln) | RS  | >26   | >5 | -  | internal plexiform and 2-6<br>subcutaneous neurofibromas,<br><i>histopathologically confirmed</i>      | scoliosis, hypertension                                                                                 | bilateral tumors in sacral nerves                                                                                                    |
| EUR-R24                                  | c.3827G>A<br>(p.Arg1276Gln) | RS  | >26   | >5 | -  | plexiform, 3 cutaneous and 6-99<br>subcutaneous neurofibromas,<br><i>histopathologically confirmed</i> | Lisch nodules, pulmonic stenosis                                                                        | diffuse symmetrical tumors on all spinal nerve roots                                                                                 |

^ IDs of individuals presenting the so-called spinal form of NF1 were bolded.

**Abbreviations:** F - familial; PrS - proven sporadic; RS - reportedly sporadic; NS - not specified; UN - unknown; CALMs - café-au-lait macules; ADD - attention deficit disorder; ADHD - attention deficit hyperactivity disorder; LD - learning disabilities; SS - short stature; MPNST - malignant peripheral nerve sheath tumor; MRI - magnetic resonance imaging.

**Supp. Table S15.** Spinal neurofibromas in individuals heterozygous for pathogenic *NF1* missense variants affecting p.Lys1423.

| ID                                              | Pathogenic variant          | Family history | Age, years | CALMs | Freckles | Neurofibromas                                                                                 | Others                                                                                                                                                  | Comments                                                                                                                                                     |
|-------------------------------------------------|-----------------------------|----------------|------------|-------|----------|-----------------------------------------------------------------------------------------------|---------------------------------------------------------------------------------------------------------------------------------------------------------|--------------------------------------------------------------------------------------------------------------------------------------------------------------|
| <b><u>SYMPTOMATIC SPINAL NEUROFIBROMAS</u></b>  |                             |                |            |       |          |                                                                                               |                                                                                                                                                         |                                                                                                                                                              |
| UAB-R5344                                       | c.4267A>G<br>(p.Lys1423Glu) | PrS            | <2         | -     | -        | internal and externally visible plexiform neurofibromas, <i>histopathologically confirmed</i> | scoliosis, SS                                                                                                                                           | bilateral tumors in thoracic (T1-8) and lumbar (L1-4) nerves as well as cauda equina, <i>histopathologically confirmed</i>                                   |
| UAB-R2741                                       | c.4267A>G<br>(p.Lys1423Glu) | PrS            | 5-8        | >5    | +        | multiple small subcutaneous neurofibromas                                                     | Noonan-like phenotype, SD, hypotonia, macrocephaly, headaches, neck pain                                                                                | tumor in the left thoracic region with no evidence of invasion of spinal canal; neurologic exam was notable for normal cranial nerves but muscular hypotonia |
| EUR-R53                                         | c.4267A>G<br>(p.Lys1423Glu) | RS             | >26 †      | <6    | +        | 100-500 cutaneous, 100-500 subcutaneous and 100-500 intradermal neurofibromas                 | Lisch nodules, delayed for age, SS, individual died at age of 47 due to progression of cerebellar glioblastoma ( <i>histopathologically confirmed</i> ) | diffuse symmetrical tumors on all spinal nerve roots                                                                                                         |
| <b><u>ASYMPTOMATIC SPINAL NEUROFIBROMAS</u></b> |                             |                |            |       |          |                                                                                               |                                                                                                                                                         |                                                                                                                                                              |
| EUR-R41                                         | c.4267A>G<br>(p.Lys1423Glu) | RS             | 5-8        | >5    | +        | externally visible plexiform neurofibromas, 6-99 cutaneous and 2-6 intradermal neurofibromas  | scoliosis, pectus excavatum, gross and fine motor delays, delayed for age, hypotonic, SD                                                                | bilateral tumors on all spinal levels (cervical C2-3, thoracic T10-12, lumbar L2-5 and sacral S1-4 nerves)                                                   |
| UAB-R1185                                       | c.4267A>G<br>(p.Lys1423Glu) | PrS            | 19-26      | >5    | -        | 6-99 cutaneous neurofibromas                                                                  | <i>possible</i> Noonan-like phenotype, pilocytic astrocytoma in thalamus (grade I) and bilateral non-ossifying fibromas in knees                        | multiple tumors at each spinal level, innumerable                                                                                                            |
| EUR-R50                                         | c.4267A>G<br>(p.Lys1423Glu) | UN             | 19-26      | >5    | +        | -                                                                                             | Lisch nodules, asymptomatic OPG                                                                                                                         | tumor in cervical nerve C7                                                                                                                                   |
| UAB-R97511FN.204                                | c.4267A>G<br>(p.Lys1423Glu) | NS             | >26        | >5    | +        | 6-99 cutaneous neurofibromas                                                                  | Noonan-like phenotype, macrocephaly, brainstem glioma                                                                                                   | bilateral tumors in lumbar nerves                                                                                                                            |

**Abbreviations:** F - familial; PrS - proven sporadic; RS - reportedly sporadic; NS - not specified; UN - unknown; CALMs - café-au-lait macules; SS - short stature; SD - speech disability; OPG - optic pathway glioma.

**Supp. Table S16.** Plexiform neurofibromas in individuals heterozygous for pathogenic *NF1* missense variants affecting p.Lys1423.

| ID               | Pathogenic variant          | Family history | Age, years | CALMs | Freckles | Others                                                                                                                   | Comments                                                                                                              |
|------------------|-----------------------------|----------------|------------|-------|----------|--------------------------------------------------------------------------------------------------------------------------|-----------------------------------------------------------------------------------------------------------------------|
| UAB-R805         | c.4267A>G<br>(p.Lys1423Glu) | NS             | <2         | >5    | +        | -                                                                                                                        | <b>PLEXIFORM NEUROFIBROMAS</b><br>orbit, face and head/neck                                                           |
| UAB-R5344        | c.4267A>G<br>(p.Lys1423Glu) | PrS            | <2         | -     | -        | symptomatic spinal neurofibromas, scoliosis, SS                                                                          | <b>PLEXIFORM NEUROFIBROMA</b><br>left back (internal and externally visible),<br><i>histopathologically confirmed</i> |
| EUR-R38          | c.4267A>G<br>(p.Lys1423Glu) | RS             | 2-4        | >5    | +        | Lisch nodules, sphenoid wing dysplasia, Noonan-like phenotype, ADHD                                                      | <b>PLEXIFORM NEUROFIBROMA</b><br>head (externally visible without hyperpigmentation)                                  |
| EUR-R41          | c.4267A>G<br>(p.Lys1423Glu) | RS             | 5-8        | >5    | +        | cutaneous, intradermal and spinal neurofibromas, scoliosis, pectus excavatum, gross and fine motor delays, hypotonic, SD | <b>PLEXIFORM NEUROFIBROMAS</b><br>head and neck (externally visible without hyperpigmentation and internal)           |
| UAB-R211         | c.4267A>G<br>(p.Lys1423Glu) | NS             | 9-13       | >5    | +        | pseudoarthrosis                                                                                                          | <b>PLEXIFORM NEUROFIBROMA</b><br>trunk                                                                                |
| UAB-R746         | c.4267A>G<br>(p.Lys1423Glu) | RS             | 9-13       | >5    | -        | cutaneous and subcutaneous neurofibromas, mild pectus excavatum, Noonan-like phenotype, abnormal development, ADHD       | <b>PLEXIFORM NEUROFIBROMAS</b><br>leg and trunk (dorsal)                                                              |
| UAB-R7403        | c.4267A>G<br>(p.Lys1423Glu) | RS             | 14-18      | >5    | +        | Noonan-like phenotype, pulmonic stenosis, ADD                                                                            | <b>PLEXIFORM NEUROFIBROMA</b><br>head (externally visible with hyperpigmentation)                                     |
| UAB-R2816        | c.4267A>G<br>(p.Lys1423Glu) | RS             | 14-18      | >5    | +        | Lisch nodules, macrocephaly                                                                                              | <b>PLEXIFORM NEUROFIBROMA</b><br>right arm (with hyperpigmentation)                                                   |
| UAB-R6707        | c.4267A>G<br>(p.Lys1423Glu) | F              | 14-18      | >5    | +        | scoliosis, SS, macrocephaly, Chiari malformation                                                                         | <b>PLEXIFORM NEUROFIBROMA</b><br>right leg (externally visible with hyperpigmentation)                                |
| UAB-R2551        | c.4267A>G<br>(p.Lys1423Glu) | RS             | 14-18      | >5    | +        | Noonan-like phenotype, dysplastic vertebrae, lordosis and kyphosis, pulmonic stenosis, leg pain, seizures, a mild tremor | <b>PLEXIFORM NEUROFIBROMAS</b><br>occiput and neck (internal)                                                         |
| EUR-R51          | c.4267A>G<br>(p.Lys1423Glu) | RS             | 19-26      | >5    | +        | Lisch nodules, bone cysts, delayed for age with severe behavior disorder                                                 | <b>PLEXIFORM NEUROFIBROMA</b><br>trunk (externally visible)                                                           |
| UAB-R53601FN.103 | c.4267A>G<br>(p.Lys1423Glu) | RS             | 19-26      | >5    | +        | Lisch nodules, cutaneous neurofibromas                                                                                   | <b>PLEXIFORM NEUROFIBROMA</b><br>left arm                                                                             |
| EUR-R35          | c.4267A>C<br>(p.Lys1423Gln) | RS             | >26        | >5    | +        | cutaneous neurofibromas, mild scoliosis, SS, low grade glioma, LD, joint laxity                                          | <b>PLEXIFORM NEUROFIBROMA</b><br>(externally visible with hyperpigmentation)                                          |
| UAB-R6071        | c.4267A>G<br>(p.Lys1423Glu) | RS             | >26        | >5    | +        | Lisch nodules, cutaneous and intradermal neurofibromas, LD                                                               | <b>PLEXIFORM NEUROFIBROMAS</b><br>head                                                                                |
| UAB-R5232        | c.4267A>G<br>(p.Lys1423Glu) | UN             | >26        | >5    | UN       | cutaneous, intradermal and subcutaneous neurofibromas, scoliosis                                                         | <b>PLEXIFORM NEUROFIBROMAS</b><br>right arm (externally visible)                                                      |
| UAB-R3903        | c.4267A>G<br>(p.Lys1423Glu) | F              | >26        | >5    | +        | Lisch nodules, cutaneous, intradermal and subcutaneous neurofibromas, SS, LD                                             | <b>PLEXIFORM NEUROFIBROMAS</b><br>left arm and right arm (externally visible)                                         |
| EUR-R47          | c.4267A>G<br>(p.Lys1423Glu) | F              | >26        | >5    | NS       | cutaneous and subcutaneous neurofibromas, scoliosis, macrocephaly                                                        | <b>PLEXIFORM NEUROFIBROMA</b><br>left arm (externally visible)                                                        |
| EUR-R48-S1       | c.4267A>G<br>(p.Lys1423Glu) | F              | >26        | >5    | +        | scoliosis, SS                                                                                                            | <b>PLEXIFORM NEUROFIBROMA</b><br>head (externally visible)                                                            |
| EUR-R48-M        | c.4267A>G<br>(p.Lys1423Glu) | F              | >26        | >5    | +        | cutaneous and subcutaneous neurofibromas, scoliosis, SS                                                                  | <b>PLEXIFORM NEUROFIBROMA</b><br>parietal region (externally visible)                                                 |

**Abbreviations:** F - familial; PrS - proven sporadic; RS - reportedly sporadic; NS - not specified; UN - unknown; CALMs - café-au-lait macules; SS - short stature; ADD - attention deficit disorder; ADHD - attention deficit hyperactivity disorder; SD - speech delay; LD - learning disabilities.

**Supp. Table S17.** Plexiform neurofibromas in individuals heterozygous for pathogenic *NF1* missense variants affecting p.Arg1276.

| ID               | Pathogenic variant          | Family history | Age, years | CALMs | Freckles | Others                                                                                                                                                                                                                                 | Comments                                                                                                                                            |
|------------------|-----------------------------|----------------|------------|-------|----------|----------------------------------------------------------------------------------------------------------------------------------------------------------------------------------------------------------------------------------------|-----------------------------------------------------------------------------------------------------------------------------------------------------|
| UAB-R7373        | c.3827G>A<br>(p.Arg1276Gln) | RS             | 9-13       | >5    | +        | Lisch nodules, ADD, ADHD, LD                                                                                                                                                                                                           | <b>PLEXIFORM NEUROFIBROMA</b><br>T9-T10 right inferior, confirmed to be a lumbosacral plexiform neurofibroma with pain                              |
| EUR-R10          | c.3826C>G<br>(p.Arg1276Gly) | RS             | 19-26      | >5    | +        | Lisch nodules, cutaneous and symptomatic spinal neurofibromas, MPNST                                                                                                                                                                   | <b>PLEXIFORM NEUROFIBROMAS</b><br>left arm and right leg (internal)                                                                                 |
| UAB-R4762        | c.3827G>A<br>(p.Arg1276Gln) | RS             | 19-26      | >5    | -        | pectus excavatum, Noonan-like phenotype, macrocephaly                                                                                                                                                                                  | <b>PLEXIFORM NEUROFIBROMA</b><br>ureter (internal), <i>histopathologically confirmed</i>                                                            |
| UAB-R0306        | c.3827G>A<br>(p.Arg1276Gln) | PrS            | 19-26      | >5    | +        | Lisch nodules, multiple subcutaneous and symptomatic spinal neurofibromas, cherubism, severe osteoporosis, left hydronephrosis, mild myopia, spina bifida occulta at S1, a history of migraines and occasional right hand numbness, SS | <b>PLEXIFORM NEUROFIBROMAS</b><br>multiple tumors with intra-abdominal, paraspinal, intraspinal, abdominal wall and chest wall locations (internal) |
| UAB-R492         | c.3827G>A<br>(p.Arg1276Gln) | NS             | 19-26      | +     | +        | multiple cutaneous, subcutaneous and symptomatic spinal neurofibromas, cystic lesion                                                                                                                                                   | <b>PLEXIFORM NEUROFIBROMAS</b><br>head/neck, trunk, arm and leg                                                                                     |
| EUR-R22          | c.3827G>A<br>(p.Arg1276Gln) | F              | 19-26      | >5    | +        | Lisch nodules, cutaneous, subcutaneous and symptomatic spinal neurofibromas, pectus excavatum                                                                                                                                          | <b>PLEXIFORM NEUROFIBROMA</b><br>right foot (externally visible)                                                                                    |
| EUR-R28          | c.3827G>A<br>(p.Arg1276Gln) | F              | 19-26      | >5    | +        | subcutaneous and symptomatic spinal neurofibromas, <i>histopathologically confirmed</i> , cysts in brain, nevi/lentiginosities                                                                                                         | <b>PLEXIFORM NEUROFIBROMA</b><br>pelvis (internal), <i>histopathologically confirmed</i>                                                            |
| EUR-R31          | c.3827G>C<br>(p.Arg1276Pro) | RS             | 19-26      | >5    | +        | intradermal neurofibromas, pectus excavatum, broad chest/telethelia, LD, nevi/lentiginosities                                                                                                                                          | <b>PLEXIFORM NEUROFIBROMA</b><br>trunk (externally visible without hyperpigmentation)                                                               |
| UAB-R7942        | c.3827G>A<br>(p.Arg1276Gln) | F              | >26        | >5    | +        | subcutaneous and symptomatic spinal neurofibromas, juvenile xanthogranuloma                                                                                                                                                            | <b>PLEXIFORM NEUROFIBROMA</b><br>pelvis (internal)                                                                                                  |
| UAB-R01611FN.104 | c.3827G>A<br>(p.Arg1276Gln) | UN             | >26        | -     | -        | subcutaneous and symptomatic spinal neurofibromas                                                                                                                                                                                      | <b>PLEXIFORM NEUROFIBROMA</b><br>(internal)                                                                                                         |
| UAB-R743         | c.3827G>A<br>(p.Arg1276Gln) | NS             | >26        | <6    | -        | symptomatic spinal neurofibromas                                                                                                                                                                                                       | <b>PLEXIFORM NEUROFIBROMAS</b><br>trunk, pelvis and sciatic nerve (internal)                                                                        |
| UAB-R743-N       | c.3827G>A<br>(p.Arg1276Gln) | F              | >26        | >5    | +        | subcutaneous and symptomatic spinal neurofibromas                                                                                                                                                                                      | <b>PLEXIFORM NEUROFIBROMAS</b><br>(internal)                                                                                                        |
| EUR-R13          | c.3827G>A<br>(p.Arg1276Gln) | F              | >26        | >5    | -        | -                                                                                                                                                                                                                                      | <b>PLEXIFORM NEUROFIBROMA</b><br>the nipple-areola complex (externally visible), <i>histopathologically confirmed</i>                               |
| EUR-R23          | c.3827G>A<br>(p.Arg1276Gln) | RS             | >26        | >5    | -        | subcutaneous and asymptomatic spinal neurofibromas, scoliosis, hypertension                                                                                                                                                            | <b>PLEXIFORM NEUROFIBROMAS</b><br>pelvis and right leg (internal), <i>histopathologically confirmed</i>                                             |
| EUR-R24          | c.3827G>A<br>(p.Arg1276Gln) | RS             | >26        | >5    | -        | Lisch nodules, cutaneous, subcutaneous and asymptomatic spinal neurofibromas, pulmonic stenosis                                                                                                                                        | <b>PLEXIFORM NEUROFIBROMA</b><br>left leg (externally visible)                                                                                      |

**Abbreviations:** F - familial; PrS - proven sporadic; RS - reportedly sporadic; NS - not specified; UN - unknown; ADD - attention deficit disorder; ADHD - attention deficit hyperactivity disorder; LD - learning disabilities; MPNST - malignant peripheral nerve sheath tumor; SS - short stature.



**Supp. Table S18.** Comparison of clinical features of the cohort of individuals heterozygous for pathogenic *NF1* missense variants affecting p.Arg1276 and p.Lys1423 with the cohort of the individuals carrying one out of the 18 most frequent recurrent pathogenic nonsense variants observed in the University of Alabama at Birmingham (UAB) database.

|                                                     | N (%)          |              |                                | P value (2-tailed Fisher's exact test) |                                    |                                    |
|-----------------------------------------------------|----------------|--------------|--------------------------------|----------------------------------------|------------------------------------|------------------------------------|
|                                                     | p.Arg1276      | p.Lys1423    | Nonsense variants <sup>A</sup> | p.Arg1276 versus p.Lys1423             | p.Arg1276 versus nonsense variants | p.Lys1423 versus nonsense variants |
| >5 CALMs                                            | 111/119 (93.3) | 86/91 (94.5) | 855/908 (94.2)                 |                                        |                                    |                                    |
| Skinfold freckling                                  | 74/112 (66.1)  | 65/85 (76.5) | 589/834 (70.6)                 |                                        |                                    |                                    |
| Lisch nodules                                       | 19/70 (24.1)   | 31/59 (52.5) | 140/474 (29.5)                 | 0.0038* ↓                              |                                    | 0.0006** ↗                         |
| Major external plexiform neurofibromas <sup>B</sup> | 5/64 (7.8)     | 14/48 (29.2) | 44/329 (13.4)                  | 0.0044* ↓                              |                                    | 0.0089* ↗                          |
| Cutaneous neurofibromas <sup>C</sup>                | 14/40 (35)     | 23/28 (82.1) | 202/237 (85.2)                 | 0.0002** ↓                             | <0.0001** ↓                        |                                    |
| Subcutaneous neurofibromas <sup>C</sup>             | 21/37 (56.8)   | 13/23 (56.5) | 76/138 (55.1)                  |                                        |                                    |                                    |
| Symptomatic spinal neurofibromas                    | 18/97 (18.6)   | 3/65 (4.6)   | 17/728 (2.3)                   | 0.0091* ↗                              | <0.0001** ↗                        |                                    |
| Symptomatic OPGs                                    | 0/97 (0)       | 1/74 (1.4)   | 45/802 (5.6)                   |                                        | 0.0109* ↓                          |                                    |
| Asymptomatic OPGs                                   | 1/48 (2.1)     | 6/40 (15)    | 41/191 (21.5)                  |                                        | 0.0006** ↓                         |                                    |
| Other malignant neoplasms <sup>D</sup>              | 4/94 (4.3)     | 7/77 (9.1)   | 33/742 (4.5)                   |                                        |                                    |                                    |
| Skeletal abnormalities                              | 32/100 (32)    | 34/83 (41)   | 151/811 (18.6)                 |                                        | 0.0033* ↗                          | <0.0001** ↗                        |
| Scoliosis <sup>C</sup>                              | 8/35 (22.9)    | 10/27 (38.5) | 29/232 (12.5)                  |                                        |                                    | 0.0024* ↗                          |
| Cognitive impairment and/or learning disabilities   | 46/105 (43.8)  | 36/87 (41.4) | 215/790 (27.2)                 |                                        | 0.0008** ↗                         | 0.0083* ↗                          |
| Noonan-like phenotype <sup>E</sup>                  | 22/106 (20.8)  | 24/83 (28.9) | 14/773 (1.8)                   |                                        | <0.0001** ↗                        | <0.0001** ↗                        |
| Short stature <sup>F</sup>                          | 14/80 (17.5)   | 21/51 (41.2) | 59/362 (16.3)                  | 0.0043* ↓                              |                                    | 0.0001** ↗                         |
| Macrocephaly                                        | 24/76 (31.6)   | 15/51 (29.4) | 113/405 (27.9)                 |                                        |                                    |                                    |
| Pulmonic stenosis                                   | 11/92 (12)     | 11/76 (14.5) | 13/701 (1.9)                   |                                        | <0.0001** ↗                        | <0.0001** ↗                        |
| Cardiovascular abnormalities                        | 22/92 (23.9)   | 19/76 (25)   | 52/701 (7.4)                   |                                        | <0.0001** ↗                        | <0.0001** ↗                        |

Statistically significant *P* values with false discovery rate (FDR) of 0.05 (indicated by \*) and 0.01 (indicated by \*\*) after correction for multiple testing using Benjamini-Hochberg procedure. After applying the Benjamini-Hochberg correction  $P \leq 0.0091$  and  $P \leq 0.0008$  remained statistically significant at FDR 0.05 and 0.01, respectively. The black arrows indicate the statistically significant differences of the NF1 clinical features prevalence between the p.Arg1276 and the p.Lys1423 studied groups, and the cohort of individuals carrying one of the most frequent recurrent pathogenic nonsense variants observed in the UAB database, with up and down arrows representing an increase and a decrease of the prevalence, respectively.

<sup>A</sup> The UAB cohort of individuals carrying one of the most frequent *NF1* nonsense pathogenic variants, that is, c.574C>T (p.Arg192\*), c.910C>T (p.Arg304\*), c.1246C>T (p.Arg416\*), c.1318C>T (p.Arg440\*), c.1381C>T (p.Arg461\*), c.2041C>T (p.Arg681\*), c.2446C>T (p.Arg816\*), c.3721C>T (p.Arg1241\*), c.3826C>T (p.Arg1276\*), c.3916C>T (p.Arg1306\*), c.4084C>T (p.Arg1362\*), c.4537C>T (p.Arg1513\*), c.5242C>T (p.Arg1748\*), c.5839C>T (p.Arg1947\*), c.6709C>T (p.Arg2237\*), c.7285C>T (p.Arg2429\*), c.7486C>T (p.Arg2496\*), c.7846C>T (p.Arg2616\*). <sup>B</sup> In individuals  $\geq 9$  years old. <sup>C</sup> In individuals  $\geq 19$  years old. <sup>D</sup> Only malignant neoplasms, not including OPGs and neurofibromas, have been taken into account. <sup>E</sup> As individual was classified as having a Noonan-like phenotype when at least two of the following features were present: short stature, low set ears, hypertelorism, midface hypoplasia, webbed neck, pectus abnormality and/or pulmonic stenosis. <sup>F</sup> As no specific growth curves are available for Hispanic and Asian populations, Hispanic and Asian individuals were excluded as having short or normal stature. **Abbreviations:** CALMs - café-au-lait macules; OPG - optic pathway glioma.

**Supp. Table S19.** Clinical characterization of individuals heterozygous for pathogenic *NF1* missense variants affecting p.Arg1276 who did not fulfill the current NIH diagnostic criteria, based on physical features, not taking family history into account.

| ID <sup>A,B</sup>  | Pathogenic variant                    | Family history | Age, years | CALMs | Freckles | Lisch nodules | Neurofibromas | OPG    | Specific skeletal abnormalities <sup>C</sup> | NIH diagnostic criteria <sup>D</sup> |
|--------------------|---------------------------------------|----------------|------------|-------|----------|---------------|---------------|--------|----------------------------------------------|--------------------------------------|
| <b>UAB-R1175-C</b> | c.3826C>G<br>(p.Arg1276Gly)           | F              | <2         | <6    | -        | -             | -             | N, UN  | -                                            | 0/6                                  |
| <b>UAB-R8876</b>   | c.3826C>G<br>(p.Arg1276Gly)           | PrS            | <2         | <6    | -        | -             | -             | N, MRI | -                                            | 0/6                                  |
| UAB-R37401FN.202   | c.3826C>G<br>(p.Arg1276Gly)           | RS             | <2         | >5    | -        | -             | -             | N, MRI | -                                            | 1/6                                  |
| UAB-R3914          | c.3827G>A<br>(p.Arg1276Gln)           | RS             | <2         | >5    | -        | -             | -             | N, MRI | -                                            | 1/6                                  |
| UAB-R40711FN.204   | c.3827G>A<br>(p.Arg1276Gln)           | RS             | <2         | >5    | -        | -             | -             | N, UN  | -                                            | 1/6                                  |
| UAB-R5166          | c.3826_3827delinsGA<br>(p.Arg1276Glu) | F              | 2-4        | >5    | -        | -             | -             | N, MRI | -                                            | 1/6                                  |
| UAB-R7354          | c.3827G>A<br>(p.Arg1276Gln)           | RS             | 2-4        | >5    | -        | -             | -             | N, MRI | -                                            | 1/6                                  |
| EUR-R14            | c.3827G>A<br>(p.Arg1276Gln)           | RS             | 2-4        | >5    | -        | -             | -             | N, UN  | -                                            | 1/6                                  |
| UAB-R7157          | c.3827G>A<br>(p.Arg1276Gln)           | UN             | 5-8        | >5    | -        | -             | -             | N, MRI | -                                            | 1/6                                  |
| UAB-R1256          | c.3827G>A<br>(p.Arg1276Gln)           | F              | 9-13       | >5    | -        | -             | -             | N, MRI | -                                            | 1/6                                  |
| EUR-R30            | c.3827G>A<br>(p.Arg1276Gln)           | RS             | 14-18      | <6    | -        | -             | +             | N, MRI | -                                            | 1/6                                  |
| UAB-R743           | c.3827G>A<br>(p.Arg1276Gln)           | NS             | >26        | <6    | -        | -             | +             | N, UN  | -                                            | 1/6                                  |

<sup>A</sup> Of the 30 cases not fulfilling the NIH diagnostic criteria after excluding the family history, 12 had complete clinical information including the ophthalmological results for the presence/absence of Lisch nodules and symptomatic OPGs; <sup>B</sup> IDs of individuals with none of the diagnostic criteria of NF1 fulfilled were bolded; <sup>C</sup> Only skeletal abnormalities with sphenoid dysplasia or thinning of the long bone cortex with/without pseudarthrosis have been taken into account; <sup>D</sup> Only clinical features without the presence/absence of a first-degree relative that meets NIH criteria have been taken into account.

**Abbreviations:** F - familial; PrS - proven sporadic; RS - reportedly sporadic; NS - not specified; UN - unknown; CALMs - café-au-lait macules; OPG - optic pathway glioma; N, UN - no symptomatic OPG, unknown if any asymptomatic OPG is present; N, MRI - no symptomatic and asymptomatic OPG detected by MRI.

**Supp. Table S20.** Noonan-like features in individuals heterozygous for pathogenic *NF1* missense variants affecting p.Arg1276.

| ID <sup>A</sup>                      | Pathogenic variant       | Family history | Age, years | CALMs | Freckles | Others                                                        | Noonan-like phenotype                                                                                                            |
|--------------------------------------|--------------------------|----------------|------------|-------|----------|---------------------------------------------------------------|----------------------------------------------------------------------------------------------------------------------------------|
| <b>UAB-R37401FN.202</b>              | c.3826C>G (p.Arg1276Gly) | RS             | <2         | >5    | -        | juvenile xanthogranuloma, eczema, keratosis pilaris, pruritus | PS, WN, MH, macroglossia, upslanting palpebral fissure, LPH, macrocephaly, gross motor delay, SD                                 |
| UAB-R7004                            | c.3827G>A (p.Arg1276Gln) | RS             | <2         | >5    | -        | -                                                             | triangular face, PT, DPF, blue irides                                                                                            |
| <b>UAB-R6444</b>                     | c.3827G>A (p.Arg1276Gln) | F              | <2         | >5    | -        | -                                                             | LSE, PA                                                                                                                          |
| UAB-R0522-C2                         | c.3827G>A (p.Arg1276Gln) | F              | 2-4        | >5    | +        | -                                                             | LSE, HTL, PS                                                                                                                     |
| <b>UAB-R32801FN.103</b>              | c.3827G>A (p.Arg1276Gln) | RS             | 2-4        | >5    | NS       | Lisch nodules                                                 | DPF, LSE, tented upper lip, bilateral epicanthal folds, a history of mild developmental delay                                    |
| UAB-R3396                            | c.3826C>G (p.Arg1276Gly) | PrS            | 5-8        | >5    | +        | Lisch nodules                                                 | <i>possible</i> (no details provided, except for a history of developmental delay in gross motor skills)                         |
| <b>UAB-R0522-C1</b>                  | c.3827G>A (p.Arg1276Gln) | F              | 5-8        | >5    | +        | -                                                             | LSE, HTL, PS                                                                                                                     |
| UAB-R0082                            | c.3827G>A (p.Arg1276Gln) | PrS            | 5-8        | >5    | +        | Lisch nodules, leg length discrepancy                         | <i>possible</i> : SS, PS, macrocephaly                                                                                           |
| UAB-R9613                            | c.3827G>A (p.Arg1276Gln) | RS             | 5-8        | >5    | +        | -                                                             | <i>possible</i> : SS, PA, macrocephaly                                                                                           |
| <b>UAB-R7733</b>                     | c.3827G>A (p.Arg1276Gln) | F              | 5-8        | >5    | +        | depigmentation consistent with vitiligo                       | HTL, DPF, hypertrophic cardiomyopathy, ventricular septal defect, macrocephaly                                                   |
| UAB-R9893                            | c.3827G>A (p.Arg1276Gln) | F              | 5-8        | >5    | +        | Lisch nodules, scoliosis, migraines, generalized itchiness    | <i>possible</i> : coarse face, frontal bossing, macrocephaly, a history of gross motor delay, ADHD                               |
| UAB-R8484                            | c.3827G>A (p.Arg1276Gln) | F              | 5-8        | >5    | +        | -                                                             | <i>possible</i> : SS, HTL, delayed for age                                                                                       |
| <b>UAB-R8805</b>                     | c.3827G>A (p.Arg1276Gln) | PrS            | 5-8        | >5    | +        | kyphosis                                                      | HTL, DPF, PS, SS, PA                                                                                                             |
| <b>UAB-R6328</b>                     | c.3827G>A (p.Arg1276Gln) | F              | 5-8        | >5    | +        | scoliosis                                                     | facial dysmorphism, PA, abnormal development (neurocognitive concerns), LD, SD, ADHD                                             |
| <b>UAB-R20511FN.204 <sup>B</sup></b> | c.3827G>A (p.Arg1276Gln) | RS             | 5-8        | >5    | -        | tricuspid atresia, hypoplastic right heart syndrome           | DPF, high forehead, mild brachycephaly, dysplastic ears with small canals, LSE, delayed for age, gross and fine motor delays, SD |
| <b>UAB-R88411FN.404</b>              | c.3827G>A (p.Arg1276Gln) | RS             | 5-8        | >5    | +        | scoliosis                                                     | PT, HTL, DPF, PA, macrocephaly, a history of developmental difficulties                                                          |
| EUR-R18                              | c.3827G>A (p.Arg1276Gln) | RS             | 5-8        | >5    | +        | Lisch nodules                                                 | <i>possible</i> : LPH, coarse facial features                                                                                    |
| <b>UAB-R0843</b>                     | c.3827G>A (p.Arg1276Gln) | RS             | 9-13       | >5    | -        | <i>possible</i> spinal neurofibromas                          | WN, HTL, DPF, mild supravalvular aortic stenosis, macrocephaly, delayed for age, gross motor delay, SD, LD                       |
| <b>UAB-R8484-S</b>                   | c.3827G>A (p.Arg1276Gln) | F              | 9-13       | >5    | +        | cutaneous neurofibromas, sphenoid wing dysplasia              | HTL, SS, DPF, delayed for age, ADD, LD                                                                                           |
| <b>UAB-R1256</b>                     | c.3827G>A (p.Arg1276Gln) | F              | 9-13       | >5    | -        | severe scoliosis                                              | <i>possible</i> : SS, PS, developmental delay                                                                                    |
| <b>UAB-R7596</b>                     | c.3827G>A (p.Arg1276Gln) | NS             | 9-13       | >5    | +        | -                                                             | SS, LSE, HTL, PA, abnormal development, LD                                                                                       |
| <b>UAB-R3896</b>                     | c.3827G>A (p.Arg1276Gln) | F              | 9-13       | >5    | +        | hypertension                                                  | PT, DPF, bossed forehead, LD                                                                                                     |
| EUR-R16                              | c.3827G>A (p.Arg1276Gln) | RS             | 9-13       | >5    | -        | Lisch nodules                                                 | <i>possible</i> (no details provided)                                                                                            |
| EUR-R19                              | c.3827G>A (p.Arg1276Gln) | RS             | 9-13       | >5    | UN       | -                                                             | <i>possible</i> : SS, DPF, delayed for age, LD                                                                                   |
| UAB-R8304                            | c.3827G>T (p.Arg1276Leu) | F              | 9-13       | >5    | +        | scoliosis, sphenoid wing dysplasia                            | <i>possible</i> : SS, MH, ADD, LD                                                                                                |

| ID                                   | Pathogenic variant       | Family history | Age, years | CALMs | Freckles | Others                                                        | Noonan-like phenotype                         |
|--------------------------------------|--------------------------|----------------|------------|-------|----------|---------------------------------------------------------------|-----------------------------------------------|
| UAB-R0193                            | c.3826C>G (p.Arg1276Gly) | F              | 14-18      | >5    | +        | spinal neurofibromas                                          | <i>possible</i> (no details provided)         |
| EUR-R8                               | c.3826C>G (p.Arg1276Gly) | F              | 14-18      | >5    | +        | scoliosis                                                     | PT, HTL, LD                                   |
| <b>UAB-R875</b>                      | c.3827G>A (p.Arg1276Gln) | RS             | 14-18      | >5    | +        | aortic stenosis, renal artery stenosis, glioma other than OPG | SS, PT, WN, PA, LD, ADD                       |
| <b>UAB-R4232</b>                     | c.3827G>A (p.Arg1276Gln) | F              | 14-18      | >5    | +        | supratentorial anaplastic ependymoma, seizures                | HTL, LSE, drooping lids, PA, LD               |
| <b>UAB-R3605</b>                     | c.3827G>A (p.Arg1276Gln) | PrS            | 14-18      | >5    | +        | -                                                             | <i>possible</i> : LSE, midface depression     |
| <b>UAB-R76501FN.202</b> <sup>c</sup> | c.3827G>A (p.Arg1276Gln) | UN             | 14-18      | >5    | +        | scoliosis                                                     | MPH, LPH                                      |
| <b>UAB-R4762</b>                     | c.3827G>A (p.Arg1276Gln) | RS             | 19-26      | >5    | -        | plexiform neurofibroma                                        | WN, LPH, PA, macrocephaly, LD                 |
| EUR-R28-S                            | c.3827G>A (p.Arg1276Gln) | F              | 19-26      | >5    | +        | Lisch nodules                                                 | HTL, LSE, short palpebral fissures            |
| UAB-R7733-F                          | c.3827G>A (p.Arg1276Gln) | F              | >26        | >5    | +        | mild scoliosis                                                | LSE, MH, jaw asymmetry, mild PT, macrocephaly |
| UAB-R5957                            | c.3827G>A (p.Arg1276Gln) | F              | >26 †      | >5    | +        | scoliosis, osteopenia, hypertension, astrocytoma              | <i>possible</i> (no details provided), LD     |
| EUR-R26                              | c.3827G>A (p.Arg1276Gln) | F              | >26        | >5    | -        | spinal neurofibromas                                          | <i>possible</i> : PS, SS                      |

<sup>A</sup> IDs of individuals with the negative RASopathy NGS panel were bolded (see details in Supporting Information Table S10). <sup>B</sup> This individual had a duplication of 1.2 Mb at 9p24.3p24.2 of uncertain significance detected by aCGH. <sup>C</sup> Mosaic case (mutant allele fraction ~31%).

**Abbreviations:** NS - not specified; UN - unknown; F - familial; RS - reportedly sporadic; PrS - proven sporadic; HTL - hypertelorism; WN - short/webed neck; MH - midface hypoplasia; LSE - low set ears; LPH - low posterior hairline; SS - short stature; PA - pectus abnormality; PT - ptosis; PS - pulmonic stenosis; DPF - downslanting palpebral fissures; ADD - attention deficit disorder; ADHD - attention deficit hyperactivity disorder; LD - learning disability; SD - speech delay; aCGH - array-comparative genomic hybridization; NGS - next generation sequencing; OPG - optic pathway glioma.

**Supp. Table S21.** Noonan-like features in individuals heterozygous for pathogenic *NF1* missense variants affecting p.Lys1423.

| ID <sup>A</sup>         | Pathogenic variant       | Family history | Age, years | CALMs | Freckles | Others                                                                                                   | Noonan-like phenotype                                                                                                                 |
|-------------------------|--------------------------|----------------|------------|-------|----------|----------------------------------------------------------------------------------------------------------|---------------------------------------------------------------------------------------------------------------------------------------|
| <b>UAB-R3301</b>        | c.4267A>G (p.Lys1423Glu) | RS             | <2         | <6    | -        | -                                                                                                        | LSE, PT, abnormal development                                                                                                         |
| UAB-R2864               | c.4267A>G (p.Lys1423Glu) | RS             | <2         | >5    | +        | -                                                                                                        | SS, PT, LSE, PS, delayed for age, hypotonic                                                                                           |
| <b>UAB-R42511FN.204</b> | c.4267A>G (p.Lys1423Glu) | RS             | <2         | <6    | +        | -                                                                                                        | PT, LSE, DPF                                                                                                                          |
| EUR-R55                 | c.4267A>G (p.Lys1423Glu) | PrS            | <2         | >5    | +        | -                                                                                                        | PT, LPH, HTL, LSE                                                                                                                     |
| <b>UAB-R7671</b>        | c.4267A>G (p.Lys1423Glu) | UN             | 2-4        | >5    | +        | Lisch nodules, right tibial torsion                                                                      | PS, PA, SD, ADHD                                                                                                                      |
| <b>UAB-R8917</b>        | c.4267A>G (p.Lys1423Glu) | RS             | 2-4        | >5    | -        | -                                                                                                        | PS, HTL, LSE, MH, macrocephaly, abnormal development, LD, SD                                                                          |
| EUR-R38                 | c.4267A>G (p.Lys1423Glu) | RS             | 2-4        | >5    | +        | Lisch nodules, plexiform neurofibroma, sphenoid wing dysplasia                                           | PT, HTL, ADHD                                                                                                                         |
| <b>UAB-R9795</b>        | c.4268A>C (p.Lys1423Thr) | RS             | 2-4        | >5    | +        | -                                                                                                        | SS, MH, HTL, PT                                                                                                                       |
| <b>UAB-R2741</b>        | c.4267A>G (p.Lys1423Glu) | PrS            | 5-8        | >5    | +        | subcutaneous and spinal neurofibromas, headaches and neck pain                                           | LSE, MH, HTL, macrocephaly, SD                                                                                                        |
| <b>UAB-R5313</b>        | c.4267A>G (p.Lys1423Glu) | PrS            | 5-8        | >5    | +        | cutaneous, intradermal and subcutaneous neurofibromas                                                    | SS, LSE, HTL, ADD, ADHD, LD                                                                                                           |
| <b>UAB-R7995</b>        | c.4267A>G (p.Lys1423Glu) | RS             | 5-8        | >5    | -        | -                                                                                                        | LSE, HTL, PA                                                                                                                          |
| EUR-R33                 | c.4267A>C (p.Lys1423Gln) | F              | 9-13       | >5    | +        | -                                                                                                        | PT, HTL, LSE, delayed for age, LD                                                                                                     |
| <b>UAB-R746</b>         | c.4267A>G (p.Lys1423Glu) | RS             | 9-13       | >5    | -        | plexiform, cutaneous and subcutaneous neurofibromas                                                      | SS, LPH, DPF, PT, epicanthal folds, LSE, WN, PA, abnormal development, ADHD                                                           |
| UAB-R0367               | c.4267A>G (p.Lys1423Glu) | RS             | 9-13       | >5    | +        | asymptomatic OPG, scoliosis                                                                              | <i>possible</i> : SS, PS                                                                                                              |
| UAB-R84111FN.204        | c.4267A>G (p.Lys1423Glu) | RS             | 9-13       | >5    | +        | asymptomatic OPG, scoliosis, hypothalamic glioma                                                         | <i>possible</i> : PA, DPF, delayed for age                                                                                            |
| <b>UAB-R5651</b>        | c.4267A>G (p.Lys1423Glu) | F              | 9-13       | >5    | +        | -                                                                                                        | LSE, HTL, WN, PS, PT, PA, ventricular septal defect, macrocephaly, gross and fine motor delays                                        |
| EUR-R40                 | c.4267A>G (p.Lys1423Glu) | F              | 9-13       | >5    | +        | -                                                                                                        | PT, HTL, DPF, macrocephaly, LD                                                                                                        |
| EUR-R54-C               | c.4267A>G (p.Lys1423Glu) | F              | 9-13       | >5    | -        | -                                                                                                        | high and large forehead, telecanthus, bilateral epicanthus, PT, short nose, posteriorly rotated ears, PA, fine motor delay, ADD, ADHD |
| <b>UAB-R5042</b>        | c.4267A>G (p.Lys1423Glu) | RS             | 14-18      | >5    | +        | bicuspid aortic valve, aortic regurgitation, aortic root dilatation, parachute deformity of mitral valve | LSE, PT, PA, LD                                                                                                                       |
| <b>UAB-R7403</b>        | c.4267A>G (p.Lys1423Glu) | RS             | 14-18      | >5    | +        | plexiform neurofibroma                                                                                   | LSE, MH, HTL, PS, ADD                                                                                                                 |
| <b>UAB-R2551</b>        | c.4267A>G (p.Lys1423Glu) | RS             | 14-18      | >5    | +        | plexiform neurofibromas, dysplastic vertebrae, lordosis, kyphosis, leg pain, seizures, a mild tremor     | PS, broad nose, malocclusion of the teeth, DPF, WN with a bulbous tip to the nose, mild mental retardation, ADD                       |
| <b>EUR-R42</b>          | c.4267A>G (p.Lys1423Glu) | RS             | 14-18      | >5    | +        | Lisch nodules                                                                                            | PS, HTL, LSE, PT, DPF, ADHD, LD                                                                                                       |

| ID <sup>A</sup>         | Pathogenic variant       | Family history | Age, years | CALMs | Freckles | Others                                                                                                                                                       | Noonan-like phenotype                                                                                     |
|-------------------------|--------------------------|----------------|------------|-------|----------|--------------------------------------------------------------------------------------------------------------------------------------------------------------|-----------------------------------------------------------------------------------------------------------|
| UAB-R1185               | c.4267A>G (p.Lys1423Glu) | PrS            | 19-26      | >5    | -        | cutaneous and spinal neurofibromas, pilocytic astrocytoma, non-ossifying fibromas                                                                            | <i>possible</i> : PT, abnormal ear shape                                                                  |
| <b>UAB-R4735</b>        | c.4267A>G (p.Lys1423Glu) | RS             | >26        | >5    | +        | cutaneous neurofibromas, bone cysts, non-ossifying fibromas, multiple giant cell tumors, a history of rhabdomyosarcoma                                       | SS, LSE, HTL, macrocephaly, asymmetry secondary to the deformation of the giant cell tumor located in jaw |
| <b>UAB-R97511FN.204</b> | c.4267A>G (p.Lys1423Glu) | NS             | >26        | >5    | +        | cutaneous and spinal neurofibromas, brainstem glioma                                                                                                         | LSE, DPF, macrocephaly                                                                                    |
| <b>EUR-R43</b>          | c.4267A>G (p.Lys1423Glu) | RS             | >26        | >5    | +        | Lisch nodules, cutaneous and subcutaneous neurofibromas                                                                                                      | PS, PT                                                                                                    |
| EUR-R45                 | c.4267A>G (p.Lys1423Glu) | RS             | >26        | >5    | +        | Lisch nodules, cutaneous and subcutaneous neurofibromas, meningioma, colon adenocarcinoma, motor polyneuropathy with myelin damage (bilateral feet steppage) | PT, HTL                                                                                                   |

<sup>A</sup> IDs of individuals with the negative RASopathy NGS panel were bolded, except for two individuals (EUR-R42 and EUR-R43) tested only for *PTPN11* (see details in Supporting Information Table S12).

**Abbreviations:** NS - not specified; UN - unnknown; F - familial; RS - reportedly sporadic; PrS - proven sporadic; HTL - hypertelorism; WN - short/webed neck; MH - midface hypoplasia; LSE - low set ears; LPH - low posterior hairline; SS - short stature; PA - pectus abnormality; PT - ptosis; PS - pulmonic stenosis; DPF - downslanting palpebral fissures; ADD - attention deficit disorder; ADHD - attention deficit hyperactivity disorder; LD - learning disability; SD - speech delay; aCGH - array-comparative genomic hybridization; NGS - next generation sequencing; OPG - optic pathway glioma.

**Supp. Table S22.** Cardiovascular abnormalities in individuals heterozygous for pathogenic *NFI* missense variants affecting p.Arg1276.

| ID                 | Pathogenic variant       | Family history | Age, years | CALMs | Freckles | Others                                                                                       | Cardiovascular abnormalities                                                           | Noonan-like phenotype |
|--------------------|--------------------------|----------------|------------|-------|----------|----------------------------------------------------------------------------------------------|----------------------------------------------------------------------------------------|-----------------------|
| UAB-R37401FN.202   | c.3826C>G (p.Arg1276Gly) | RS             | <2         | >5    | -        | juvenile xanthogranuloma, macrocephaly, gross motor delay, SD                                | mild pulmonic stenosis                                                                 | +                     |
| UAB-R0522-C2       | c.3827G>A (p.Arg1276Gln) | F              | 2-4        | >5    | +        | -                                                                                            | pulmonic stenosis                                                                      | +                     |
| UAB-R6328-S        | c.3827G>A (p.Arg1276Gln) | F              | 5-8        | >5    | -        | macrocephaly                                                                                 | pulmonic stenosis                                                                      | -                     |
| UAB-R853           | c.3827G>A (p.Arg1276Gln) | RS             | 5-8        | >5    | +        | SS, motor delay                                                                              | Moya moya disease, left middle artery stenosis                                         | -                     |
| UAB-R0522-C1       | c.3827G>A (p.Arg1276Gln) | F              | 5-8        | >5    | +        | -                                                                                            | pulmonic stenosis                                                                      | +                     |
| UAB-R0082          | c.3827G>A (p.Arg1276Gln) | PrS            | 5-8        | >5    | +        | Lisch nodules, leg length discrepancy, SS, macrocephaly                                      | pulmonic stenosis                                                                      | -                     |
| UAB-R7733          | c.3827G>A (p.Arg1276Gln) | F              | 5-8        | >5    | +        | macrocephaly                                                                                 | hypertrophic cardiomyopathy, ventricular septal defect                                 | +                     |
| UAB-R9514          | c.3827G>A (p.Arg1276Gln) | RS             | 5-8        | >5    | -        | Lisch nodules, macrocephaly                                                                  | mild supravalvular pulmonic pulmonic and aortic stenosis                               | -                     |
| UAB-R8805          | c.3827G>A (p.Arg1276Gln) | PrS            | 5-8        | >5    | +        | pectus excavatum, kyphosis                                                                   | pulmonic stenosis                                                                      | +                     |
| UAB-R20511FN.204   | c.3827G>A (p.Arg1276Gln) | RS             | 5-8        | >5    | -        | delayed for age, gross and fine motor delays, SD                                             | tricuspid atresia, hypoplastic right heart syndrome                                    | +                     |
| UAB-R0843          | c.3827G>A (p.Arg1276Gln) | RS             | 9-13       | >5    | -        | macrocephaly, delayed for age, gross motor delay, SD, LD                                     | mild supravalvular aortic stenosis                                                     | +                     |
| UAB-R1256          | c.3827G>A (p.Arg1276Gln) | F              | 9-13       | >5    | -        | severe scoliosis, SS, developmental delay                                                    | left ventricular hypertrophy, aortic stenosis, aortic septal defect, pulmonic stenosis | -                     |
| UAB-R3896          | c.3827G>A (p.Arg1276Gln) | F              | 9-13       | >5    | +        | LD                                                                                           | hypertension                                                                           | +                     |
| UAB-R875           | c.3827G>A (p.Arg1276Gln) | F              | 14-18      | >5    | +        | scoliosis, pectus excavatum, other glioma than OPG, LD, ADD                                  | aortic stenosis, renal artery stenosis, pulmonic valve stenosis                        | +                     |
| EUR-R7             | c.3826C>G (p.Arg1276Gly) | RS             | >26        | >5    | UN       | 6-99 cutaneous neurofibromas                                                                 | myocardial infarction                                                                  | UN                    |
| UAB-R1256-M        | c.3827G>A (p.Arg1276Gln) | F              | >26        | >5    | +        | 2-6 cutaneous, subcutaneous, intradermal and spinal neurofibromas, scoliosis                 | aortic septal defect                                                                   | -                     |
| EUR-R21-F          | c.3827G>A (p.Arg1276Gln) | RS             | >26        | >5    | +        | 6-99 subcutaneous and spinal neurofibromas, colon cancer                                     | hypertension                                                                           | -                     |
| EUR-R23            | c.3827G>A (p.Arg1276Gln) | RS             | >26        | >5    | -        | plexiform, subcutaneous and spinal neurofibromas, scoliosis                                  | hypertension                                                                           | -                     |
| EUR-R24            | c.3827G>A (p.Arg1276Gln) | RS             | >26        | >5    | -        | Lisch nodules, plexiform, cutaneous, subcutaneous and spinal neurofibromas                   | pulmonic stenosis                                                                      | -                     |
| EUR-R26            | c.3827G>A (p.Arg1276Gln) | F              | >26        | >5    | -        | spinal neurofibromas, scoliosis, osteopenia                                                  | hypertension, pulmonic stenosis                                                        | -                     |
| UAB-R3393-F        | c.3827G>T (p.Arg1276Leu) | RS             | >26        | >5    | +        | -                                                                                            | hypertension, carotid artery stenosis, coronary disease, strokes                       | UN                    |
| UAB-R37411FN.204-F | c.3826C>G (p.Arg1276Gly) | UN             | >26        | >5    | +        | 2-6 cutaneous neurofibromas, lipoma, diffuse astrocytoma on right frontal lobe (WHO grade I) | atrial fibrillation                                                                    | NS                    |

**Abbreviations:** UN - unknown; F - familial; RS - reportedly sporadic; PrS - proven sporadic; SS - short stature; ADD - attention deficit disorder; LD - learning disability; SD - speech delay; SS - short stature; OPG - optic pathway glioma; NS - not specified.

**Supp. Table S23.** Cardiovascular abnormalities in individuals heterozygous for pathogenic *NFI* missense variants affecting p.Lys1423.

| ID          | Pathogenic variant       | Family history | Age, years | CALMs | Freckles | Others                                                                                                                                                      | Cardiovascular abnormalities                                                                                  | Noonan-like phenotype |
|-------------|--------------------------|----------------|------------|-------|----------|-------------------------------------------------------------------------------------------------------------------------------------------------------------|---------------------------------------------------------------------------------------------------------------|-----------------------|
| UAB-R1816   | c.4267A>C (p.Lys1423Gln) | UN             | <2         | >5    | +        | gross motor delay                                                                                                                                           | pulmonic stenosis                                                                                             | -                     |
| UAB-R2864   | c.4267A>G (p.Lys1423Glu) | RS             | <2         | >5    | +        | Lisch nodules, SS, left midbrain lesion, likely low-grade glioma, delayed for age, hypotonic                                                                | pulmonic stenosis                                                                                             | +                     |
| UAB-R3936   | c.4267A>G (p.Lys1423Glu) | F              | <2         | <6    | +        | -                                                                                                                                                           | pulmonic stenosis                                                                                             | -                     |
| UAB-R7671   | c.4267A>G (p.Lys1423Glu) | UN             | 2-4        | >5    | +        | Lisch nodules, right tibial torsion, mild pectus carinatum, SD, ADHD                                                                                        | pulmonic stenosis                                                                                             | +                     |
| UAB-R8917   | c.4267A>G (p.Lys1423Glu) | RS             | 2-4        | >5    | -        | macrocephaly, abnormal development, LD, SD                                                                                                                  | pulmonic stenosis                                                                                             | +                     |
| UAB-R6953   | c.4267A>G (p.Lys1423Glu) | NS             | 5-8        | NS    | NS       | SD, LD                                                                                                                                                      | a history of small ventricular septal defect and functional murmur                                            | NS                    |
| UAB-R2305   | c.4267A>G (p.Lys1423Glu) | RS             | 9-13       | >5    | -        | asymptomatic OPG                                                                                                                                            | aortic stenosis                                                                                               | -                     |
| UAB-R0367   | c.4267A>G (p.Lys1423Glu) | RS             | 9-13       | >5    | +        | asymptomatic OPG, scoliosis, SS                                                                                                                             | pulmonic stenosis                                                                                             | -                     |
| UAB-R5651   | c.4267A>G (p.Lys1423Glu) | F              | 9-13       | >5    | +        | pectus excavatum, pes planus, macrocephaly, gross and fine motor delays                                                                                     | ventricular septal defect, pulmonic valve stenosis                                                            | +                     |
| UAB-R5042   | c.4267A>G (p.Lys1423Glu) | RS             | 14-18      | >5    | +        | pectus excavatum, LD                                                                                                                                        | bicuspid aortic valve, aortic regurgitation, mild aortic root dilatation, parachute deformity of mitral valve | +                     |
| UAB-R7403   | c.4267A>G (p.Lys1423Glu) | RS             | 14-18      | >5    | +        | plexiform neurofibroma, ADD                                                                                                                                 | pulmonic stenosis                                                                                             | +                     |
| UAB-R4165   | c.4267A>G (p.Lys1423Glu) | UN             | 14-18      | >5    | +        | Lisch nodules, abnormal development, LD                                                                                                                     | Wolff-Parkinson-White syndrome                                                                                | -                     |
| UAB-R2551   | c.4267A>G (p.Lys1423Glu) | RS             | 14-18      | >5    | +        | plexiform neurofibroma, dysplastic vertebra, lumbar lordosis and slight cervical kyphosis visible on X-ray imaging, mild mental retardation, ADD, dyspraxia | pulmonic stenosis                                                                                             | +                     |
| EUR-R42     | c.4267A>G (p.Lys1423Glu) | RS             | 14-18      | >5    | +        | Lisch nodules, ADHD, LD                                                                                                                                     | pulmonic stenosis                                                                                             | +                     |
| UAB-R9485   | c.4267A>G (p.Lys1423Glu) | RS             | 19-26      | >5    | +        | a history of scoliosis and mild kyphosis visible on X-ray imaging, multiple non-ossifying fibromas, LD                                                      | a history of hypertension                                                                                     | -                     |
| UAB-R4031   | c.4267A>G (p.Lys1423Glu) | RS             | >26        | >5    | +        | Lisch nodules, >500 cutaneous and subcutaneous neurofibroma, osteoporosis, scoliosis, SS, macrocephaly                                                      | dilated ventricles                                                                                            | -                     |
| UAB-R4031-C | c.4267A>G (p.Lys1423Glu) | F              | >26        | >5    | +        | 100-500 cutaneous, 6-99 subcutaneous and 100-500 intradermal neurofibromas, dural ectasia in thoracic spine, macrocephaly                                   | Moya moya disease                                                                                             | -                     |
| UAB-R4031   | c.4267A>G (p.Lys1423Glu) | RS             | >26        | >5    | +        | Lisch nodules, >500 cutaneous and subcutaneous neurofibromas, osteoporosis, scoliosis, SS, macrocephaly                                                     | dilated ventricles                                                                                            | -                     |
| EUR-R43     | c.4267A>G (p.Lys1423Glu) | RS             | >26        | >5    | +        | Lisch nodules, cutaneous and subcutaneous neurofibromas (# unknown)                                                                                         | pulmonic valve stenosis, hypertension                                                                         | +                     |
| EUR-R52     | c.4267A>G (p.Lys1423Glu) | RS             | >26        | >5    | -        | Lisch nodules, 100-500 cutaneous, 6-99 subcutaneous and 6-99 intradermal neurofibromas, cubitus valgus, SS, hypothalamic glioma                             | mitral valve anomaly                                                                                          | -                     |

**Abbreviations:** NS - not specified; UN - unknown; F - familial; RS - reportedly sporadic; PrS - proven sporadic; SS - short stature; ADD - attention deficit disorder; ADHD - attention deficit hyperactivity disorder; LD - learning disability; SD - speech delay; OPG - optic pathway glioma.



**Supp. Table S24.** List of all adjusted *P* values from Table 1 after applying the Benjamini-Hochberg correction for multiple testing with false discovery rates (FDR) at 0.05 and 0.01.

| <i>P</i> value | index | Statistical significance at FDR=0.05 |                    | Statistical significance at FDR=0.01 |                    |
|----------------|-------|--------------------------------------|--------------------|--------------------------------------|--------------------|
|                |       | B-H critical <sup>A</sup>            | value <sup>B</sup> | B-H critical <sup>A</sup>            | value <sup>B</sup> |
| 1.0000         | 1     | 0.0250                               |                    | 0.0050                               |                    |
| 1.0000         | 2     | 0.0247                               |                    | 0.0049                               |                    |
| 1.0000         | 3     | 0.0243                               |                    | 0.0049                               |                    |
| 1.0000         | 4     | 0.0240                               |                    | 0.0048                               |                    |
| 1.0000         | 5     | 0.0236                               |                    | 0.0047                               |                    |
| 1.0000         | 6     | 0.0233                               |                    | 0.0047                               |                    |
| 1.0000         | 7     | 0.0229                               |                    | 0.0046                               |                    |
| 1.0000         | 8     | 0.0226                               |                    | 0.0045                               |                    |
| 1.0000         | 9     | 0.0222                               |                    | 0.0044                               |                    |
| 1.0000         | 10    | 0.0219                               |                    | 0.0044                               |                    |
| 1.0000         | 11    | 0.0215                               |                    | 0.0043                               |                    |
| 1.0000         | 12    | 0.0212                               |                    | 0.0042                               |                    |
| 1.0000         | 13    | 0.0208                               |                    | 0.0042                               |                    |
| 1.0000         | 14    | 0.0205                               |                    | 0.0041                               |                    |
| 1.0000         | 15    | 0.0201                               |                    | 0.0040                               |                    |
| 1.0000         | 16    | 0.0198                               |                    | 0.0040                               |                    |
| 1.0000         | 17    | 0.0194                               |                    | 0.0039                               |                    |
| 1.0000         | 18    | 0.0191                               |                    | 0.0038                               |                    |
| 1.0000         | 19    | 0.0188                               |                    | 0.0038                               |                    |
| 1.0000         | 20    | 0.0184                               |                    | 0.0037                               |                    |
| 1.0000         | 21    | 0.0181                               |                    | 0.0036                               |                    |
| 1.0000         | 22    | 0.0177                               |                    | 0.0035                               |                    |
| 0.8698         | 23    | 0.0174                               |                    | 0.0035                               |                    |
| 0.8138         | 24    | 0.0170                               |                    | 0.0034                               |                    |
| 0.7909         | 25    | 0.0167                               |                    | 0.0033                               |                    |
| 0.7810         | 26    | 0.0163                               |                    | 0.0033                               |                    |
| 0.7660         | 27    | 0.0160                               |                    | 0.0032                               |                    |
| 0.7613         | 28    | 0.0156                               |                    | 0.0031                               |                    |
| 0.6633         | 29    | 0.0153                               |                    | 0.0031                               |                    |
| 0.6237         | 30    | 0.0149                               |                    | 0.0030                               |                    |
| 0.5911         | 31    | 0.0146                               |                    | 0.0029                               |                    |
| 0.5809         | 32    | 0.0142                               |                    | 0.0028                               |                    |
| 0.5711         | 33    | 0.0139                               |                    | 0.0028                               |                    |
| 0.4645         | 34    | 0.0135                               |                    | 0.0027                               |                    |
| 0.4498         | 35    | 0.0132                               |                    | 0.0026                               |                    |
| 0.4368         | 36    | 0.0128                               |                    | 0.0026                               |                    |
| 0.3860         | 37    | 0.0125                               |                    | 0.0025                               |                    |
| 0.2612         | 38    | 0.0122                               |                    | 0.0024                               |                    |
| 0.2579         | 39    | 0.0118                               |                    | 0.0024                               |                    |
| 0.2485         | 40    | 0.0115                               |                    | 0.0023                               |                    |
| 0.2473         | 41    | 0.0111                               |                    | 0.0022                               |                    |
| 0.2430         | 42    | 0.0108                               |                    | 0.0022                               |                    |
| 0.2411         | 43    | 0.0104                               |                    | 0.0021                               |                    |
| 0.2359         | 44    | 0.0101                               |                    | 0.0020                               |                    |
| 0.2259         | 45    | 0.0097                               |                    | 0.0019                               |                    |
| 0.1722         | 46    | 0.0094                               |                    | 0.0019                               |                    |
| 0.1676         | 47    | 0.0090                               |                    | 0.0018                               |                    |
| 0.1466         | 48    | 0.0087                               |                    | 0.0017                               |                    |
| 0.1319         | 49    | 0.0083                               |                    | 0.0017                               |                    |
| 0.1168         | 50    | 0.0080                               |                    | 0.0016                               |                    |
| 0.0810         | 51    | 0.0076                               |                    | 0.0015                               |                    |
| 0.0675         | 52    | 0.0073                               |                    | 0.0015                               |                    |
| 0.0585         | 53    | 0.0069                               |                    | 0.0014                               |                    |
| 0.0520         | 54    | 0.0066                               |                    | 0.0013                               |                    |
| 0.0196         | 55    | 0.0063                               |                    | 0.0013                               |                    |
| 0.0195         | 56    | 0.0059                               |                    | 0.0012                               |                    |
| 0.0120         | 57    | 0.0056                               |                    | 0.0011                               |                    |
| 0.0103         | 58    | 0.0052                               |                    | 0.0010                               |                    |
| 0.0085         | 59    | 0.0049                               |                    | 0.0010                               |                    |
| <b>0.0023</b>  | 60    | 0.0045                               | *                  | 0.0009                               |                    |
| 0.0023         | 61    | 0.0042                               | *                  | 0.0008                               |                    |
| <b>0.0005</b>  | 62    | 0.0038                               | *                  | 0.0008                               | *                  |
| 0.0001         | 63    | 0.0035                               | *                  | 0.0007                               | *                  |
| 0.0001         | 64    | 0.0031                               | *                  | 0.0006                               | *                  |
| 0.0001         | 65    | 0.0028                               | *                  | 0.0006                               | *                  |
| 0.0001         | 66    | 0.0024                               | *                  | 0.0005                               | *                  |
| 0.0001         | 67    | 0.0021                               | *                  | 0.0004                               | *                  |
| 0.0001         | 68    | 0.0017                               | *                  | 0.0003                               | *                  |
| 0.0001         | 69    | 0.0014                               | *                  | 0.0003                               | *                  |
| 0.0001         | 70    | 0.0010                               | *                  | 0.0002                               | *                  |
| 0.0001         | 71    | 0.0007                               | *                  | 0.0001                               | *                  |
| 0.0001         | 72    | 0.0003                               | *                  | 0.0001                               | *                  |

<sup>A</sup> According to Thissen et al. (2002); <sup>B</sup> An asterisk (\*) indicates the statistically significant *P*-value after B-H correction.

**Supp. Table S25.** List of all adjusted *P* values from Table 2 after applying the Benjamini-Hochberg correction for multiple testing with false discovery rates (FDR) at 0.05 and 0.01.

| <i>P</i> value | index | Statistical significance at FDR=0.05 |                    | Statistical significance at FDR=0.01 |                    |
|----------------|-------|--------------------------------------|--------------------|--------------------------------------|--------------------|
|                |       | B-H critical <sup>A</sup>            | value <sup>B</sup> | B-H critical <sup>A</sup>            | value <sup>B</sup> |
| 1.0000         | 1     | 0.0250                               |                    | 0.0050                               |                    |
| 1.0000         | 2     | 0.0247                               |                    | 0.0049                               |                    |
| 1.0000         | 3     | 0.0243                               |                    | 0.0049                               |                    |
| 1.0000         | 4     | 0.0240                               |                    | 0.0048                               |                    |
| 1.0000         | 5     | 0.0236                               |                    | 0.0047                               |                    |
| 1.0000         | 6     | 0.0233                               |                    | 0.0047                               |                    |
| 1.0000         | 7     | 0.0229                               |                    | 0.0046                               |                    |
| 0.9128         | 8     | 0.0226                               |                    | 0.0045                               |                    |
| 0.8900         | 9     | 0.0222                               |                    | 0.0044                               |                    |
| 0.8303         | 10    | 0.0219                               |                    | 0.0044                               |                    |
| 0.8290         | 11    | 0.0215                               |                    | 0.0043                               |                    |
| 0.7607         | 12    | 0.0212                               |                    | 0.0042                               |                    |
| 0.7477         | 13    | 0.0208                               |                    | 0.0042                               |                    |
| 0.7450         | 14    | 0.0205                               |                    | 0.0041                               |                    |
| 0.7041         | 15    | 0.0201                               |                    | 0.0040                               |                    |
| 0.6940         | 16    | 0.0198                               |                    | 0.0040                               |                    |
| 0.6804         | 17    | 0.0194                               |                    | 0.0039                               |                    |
| 0.5452         | 18    | 0.0191                               |                    | 0.0038                               |                    |
| 0.5236         | 19    | 0.0188                               |                    | 0.0038                               |                    |
| 0.5224         | 20    | 0.0184                               |                    | 0.0037                               |                    |
| 0.4853         | 21    | 0.0181                               |                    | 0.0036                               |                    |
| 0.4514         | 22    | 0.0177                               |                    | 0.0035                               |                    |
| 0.3383         | 23    | 0.0174                               |                    | 0.0035                               |                    |
| 0.3162         | 24    | 0.0170                               |                    | 0.0034                               |                    |
| 0.3039         | 25    | 0.0167                               |                    | 0.0033                               |                    |
| 0.2560         | 26    | 0.0163                               |                    | 0.0033                               |                    |
| 0.2461         | 27    | 0.0160                               |                    | 0.0032                               |                    |
| 0.2459         | 28    | 0.0156                               |                    | 0.0031                               |                    |
| 0.2028         | 29    | 0.0153                               |                    | 0.0031                               |                    |
| 0.1998         | 30    | 0.0149                               |                    | 0.0030                               |                    |
| 0.1895         | 31    | 0.0146                               |                    | 0.0029                               |                    |
| 0.1685         | 32    | 0.0142                               |                    | 0.0028                               |                    |
| 0.1666         | 33    | 0.0139                               |                    | 0.0028                               |                    |
| 0.1031         | 34    | 0.0135                               |                    | 0.0027                               |                    |
| 0.0867         | 35    | 0.0132                               |                    | 0.0026                               |                    |
| 0.0844         | 36    | 0.0128                               |                    | 0.0026                               |                    |
| 0.0817         | 37    | 0.0125                               |                    | 0.0025                               |                    |
| 0.0748         | 38    | 0.0122                               |                    | 0.0024                               |                    |
| 0.0549         | 39    | 0.0118                               |                    | 0.0024                               |                    |
| 0.0507         | 40    | 0.0115                               |                    | 0.0023                               |                    |
| 0.0505         | 41    | 0.0111                               |                    | 0.0022                               |                    |
| 0.0467         | 42    | 0.0108                               |                    | 0.0022                               |                    |
| 0.0371         | 43    | 0.0104                               |                    | 0.0021                               |                    |
| 0.0203         | 44    | 0.0101                               |                    | 0.0020                               |                    |
| 0.0104         | 45    | 0.0097                               |                    | 0.0019                               |                    |
| <b>0.0076</b>  | 46    | 0.0094                               | *                  | 0.0019                               |                    |
| 0.0070         | 47    | 0.0090                               | *                  | 0.0018                               |                    |
| 0.0070         | 48    | 0.0087                               | *                  | 0.0017                               |                    |
| 0.0059         | 49    | 0.0083                               | *                  | 0.0017                               |                    |
| 0.0055         | 50    | 0.0080                               | *                  | 0.0016                               |                    |
| 0.0040         | 51    | 0.0076                               | *                  | 0.0015                               |                    |
| 0.0038         | 52    | 0.0073                               | *                  | 0.0015                               |                    |
| 0.0037         | 53    | 0.0069                               | *                  | 0.0014                               |                    |
| 0.0034         | 54    | 0.0066                               | *                  | 0.0013                               |                    |
| 0.0016         | 55    | 0.0063                               | *                  | 0.0013                               |                    |
| 0.0012         | 56    | 0.0059                               | *                  | 0.0012                               |                    |
| <b>0.0002</b>  | 57    | 0.0056                               | *                  | 0.0011                               | *                  |
| 0.0001         | 58    | 0.0052                               | *                  | 0.0010                               | *                  |
| 0.0001         | 59    | 0.0049                               | *                  | 0.0010                               | *                  |
| 0.0001         | 60    | 0.0045                               | *                  | 0.0009                               | *                  |
| 0.0001         | 61    | 0.0042                               | *                  | 0.0008                               | *                  |
| 0.0001         | 62    | 0.0038                               | *                  | 0.0008                               | *                  |
| 0.0001         | 63    | 0.0035                               | *                  | 0.0007                               | *                  |
| 0.0001         | 64    | 0.0031                               | *                  | 0.0006                               | *                  |
| 0.0001         | 65    | 0.0028                               | *                  | 0.0006                               | *                  |
| 0.0001         | 66    | 0.0024                               | *                  | 0.0005                               | *                  |
| 0.0001         | 67    | 0.0021                               | *                  | 0.0004                               | *                  |
| 0.0001         | 68    | 0.0017                               | *                  | 0.0003                               | *                  |
| 0.0001         | 69    | 0.0014                               | *                  | 0.0003                               | *                  |
| 0.0001         | 70    | 0.0010                               | *                  | 0.0002                               | *                  |
| 0.0001         | 71    | 0.0007                               | *                  | 0.0001                               | *                  |
| 0.0001         | 72    | 0.0003                               | *                  | 0.0001                               | *                  |

<sup>A</sup> According to Thissen et al. (2002); <sup>B</sup> An asterisk (\*) indicates the statistically significant *P*-value after B-H correction.

**Supp. Table S26.** List of all adjusted *P* values from Table 3 after applying the Benjamini-Hochberg correction for multiple testing with false discovery rates (FDR) at 0.05 and 0.01.

| <i>P</i> value | index | Statistical significance at FDR=0.05 |                    | Statistical significance at FDR=0.01 |                    |
|----------------|-------|--------------------------------------|--------------------|--------------------------------------|--------------------|
|                |       | B-H critical <sup>A</sup>            | value <sup>B</sup> | B-H critical <sup>A</sup>            | value <sup>B</sup> |
| 1.0000         | 1     | 0.0250                               |                    | 0.0050                               |                    |
| 1.0000         | 2     | 0.0247                               |                    | 0.0049                               |                    |
| 1.0000         | 3     | 0.0243                               |                    | 0.0049                               |                    |
| 1.0000         | 4     | 0.0240                               |                    | 0.0048                               |                    |
| 0.8102         | 5     | 0.0236                               |                    | 0.0047                               |                    |
| 0.8085         | 6     | 0.0233                               |                    | 0.0047                               |                    |
| 0.7941         | 7     | 0.0229                               |                    | 0.0046                               |                    |
| 0.7672         | 8     | 0.0226                               |                    | 0.0045                               |                    |
| 0.6357         | 9     | 0.0222                               |                    | 0.0044                               |                    |
| 0.6305         | 10    | 0.0219                               |                    | 0.0044                               |                    |
| 0.5436         | 11    | 0.0215                               |                    | 0.0043                               |                    |
| 0.53*56        | 12    | 0.0212                               |                    | 0.0042                               |                    |
| 0.5239         | 13    | 0.0208                               |                    | 0.0042                               |                    |
| 0.5071         | 14    | 0.0205                               |                    | 0.0041                               |                    |
| 0.4671         | 15    | 0.0201                               |                    | 0.0040                               |                    |
| 0.3489         | 16    | 0.0198                               |                    | 0.0040                               |                    |
| 0.3474         | 17    | 0.0194                               |                    | 0.0039                               |                    |
| 0.3457         | 18    | 0.0191                               |                    | 0.0038                               |                    |
| 0.3457         | 19    | 0.0188                               |                    | 0.0038                               |                    |
| 0.3033         | 20    | 0.0184                               |                    | 0.0037                               |                    |
| 0.2758         | 21    | 0.0181                               |                    | 0.0036                               |                    |
| 0.2705         | 22    | 0.0177                               |                    | 0.0035                               |                    |
| 0.2696         | 23    | 0.0174                               |                    | 0.0035                               |                    |
| 0.2552         | 24    | 0.0170                               |                    | 0.0034                               |                    |
| 0.2522         | 25    | 0.0167                               |                    | 0.0033                               |                    |
| 0.2184         | 26    | 0.0163                               |                    | 0.0033                               |                    |
| 0.2141         | 27    | 0.0160                               |                    | 0.0032                               |                    |
| 0.1851         | 28    | 0.0156                               |                    | 0.0031                               |                    |
| 0.1771         | 29    | 0.0153                               |                    | 0.0031                               |                    |
| 0.1522         | 30    | 0.0149                               |                    | 0.0030                               |                    |
| 0.1494         | 31    | 0.0146                               |                    | 0.0029                               |                    |
| 0.1168         | 32    | 0.0142                               |                    | 0.0028                               |                    |
| 0.1148         | 33    | 0.0139                               |                    | 0.0028                               |                    |
| 0.0955         | 34    | 0.0135                               |                    | 0.0027                               |                    |
| 0.0908         | 35    | 0.0132                               |                    | 0.0026                               |                    |
| 0.0863         | 36    | 0.0128                               |                    | 0.0026                               |                    |
| 0.0847         | 37    | 0.0125                               |                    | 0.0025                               |                    |
| 0.0695         | 38    | 0.0122                               |                    | 0.0024                               |                    |
| 0.0694         | 39    | 0.0118                               |                    | 0.0024                               |                    |
| 0.0571         | 40    | 0.0115                               |                    | 0.0023                               |                    |
| 0.0358         | 41    | 0.0111                               |                    | 0.0022                               |                    |
| 0.0306         | 42    | 0.0108                               |                    | 0.0022                               |                    |
| 0.0257         | 43    | 0.0104                               |                    | 0.0021                               |                    |
| 0.0194         | 44    | 0.0101                               |                    | 0.0020                               |                    |
| 0.0189         | 45    | 0.0097                               |                    | 0.0019                               |                    |
| 0.0176         | 46    | 0.0094                               |                    | 0.0019                               |                    |
| 0.0173         | 47    | 0.0090                               |                    | 0.0018                               |                    |
| 0.0097         | 48    | 0.0087                               |                    | 0.0017                               |                    |
| <b>0.0074</b>  | 49    | 0.0083                               | *                  | 0.0017                               |                    |
| 0.0070         | 50    | 0.0080                               | *                  | 0.0016                               |                    |
| 0.0053         | 51    | 0.0076                               | *                  | 0.0015                               |                    |
| 0.0052         | 52    | 0.0073                               | *                  | 0.0015                               |                    |
| 0.0022         | 53    | 0.0069                               | *                  | 0.0014                               |                    |
| <b>0.0011</b>  | 54    | 0.0066                               | *                  | 0.0013                               | *                  |
| 0.0010         | 55    | 0.0063                               | *                  | 0.0013                               | *                  |
| 0.0002         | 56    | 0.0059                               | *                  | 0.0012                               | *                  |
| 0.0002         | 57    | 0.0056                               | *                  | 0.0011                               | *                  |
| 0.0001         | 58    | 0.0052                               | *                  | 0.0010                               | *                  |
| 0.0001         | 59    | 0.0049                               | *                  | 0.0010                               | *                  |
| 0.0001         | 60    | 0.0045                               | *                  | 0.0009                               | *                  |
| 0.0001         | 61    | 0.0042                               | *                  | 0.0008                               | *                  |
| 0.0001         | 62    | 0.0038                               | *                  | 0.0008                               | *                  |
| 0.0001         | 63    | 0.0035                               | *                  | 0.0007                               | *                  |
| 0.0001         | 64    | 0.0031                               | *                  | 0.0006                               | *                  |
| 0.0001         | 65    | 0.0028                               | *                  | 0.0006                               | *                  |
| 0.0001         | 66    | 0.0024                               | *                  | 0.0005                               | *                  |
| 0.0001         | 67    | 0.0021                               | *                  | 0.0004                               | *                  |
| 0.0001         | 68    | 0.0017                               | *                  | 0.0003                               | *                  |
| 0.0001         | 69    | 0.0014                               | *                  | 0.0003                               | *                  |
| 0.0001         | 70    | 0.0010                               | *                  | 0.0002                               | *                  |
| 0.0001         | 71    | 0.0007                               | *                  | 0.0001                               | *                  |
| 0.0001         | 72    | 0.0003                               | *                  | 0.0001                               | *                  |

<sup>A</sup> According to Thissen et al. (2002); <sup>B</sup> An asterisk (\*) indicates the statistically significant *P*-value after B-H correction.

**Supp. Table S27.** List of all adjusted *P* values from Supporting Information Table S18 after applying the Benjamini-Hochberg correction for multiple testing with false discovery rates (FDR) at 0.05 and 0.01.

| <i>P</i> value | index | Statistical significance at FDR=0.05 |                    | Statistical significance at FDR=0.01 |                    |
|----------------|-------|--------------------------------------|--------------------|--------------------------------------|--------------------|
|                |       | B-H critical <sup>A</sup>            | value <sup>B</sup> | B-H critical <sup>A</sup>            | value <sup>B</sup> |
| 1.0000         | 1     | 0.0250                               |                    | 0.0050                               |                    |
| 1.0000         | 2     | 0.0245                               |                    | 0.0049                               |                    |
| 1.0000         | 3     | 0.0241                               |                    | 0.0048                               |                    |
| 1.0000         | 4     | 0.0236                               |                    | 0.0047                               |                    |
| 1.0000         | 5     | 0.0231                               |                    | 0.0046                               |                    |
| 1.0000         | 6     | 0.0227                               |                    | 0.0045                               |                    |
| 0.8689         | 7     | 0.0222                               |                    | 0.0044                               |                    |
| 0.8678         | 8     | 0.0218                               |                    | 0.0044                               |                    |
| 0.8463         | 9     | 0.0213                               |                    | 0.0043                               |                    |
| 0.7801         | 10    | 0.0208                               |                    | 0.0042                               |                    |
| 0.7787         | 11    | 0.0204                               |                    | 0.0041                               |                    |
| 0.7707         | 12    | 0.0199                               |                    | 0.0040                               |                    |
| 0.6799         | 13    | 0.0194                               |                    | 0.0039                               |                    |
| 0.6526         | 14    | 0.0190                               |                    | 0.0038                               |                    |
| 0.5876         | 15    | 0.0185                               |                    | 0.0037                               |                    |
| 0.5797         | 16    | 0.0181                               |                    | 0.0036                               |                    |
| 0.5167         | 17    | 0.0176                               |                    | 0.0035                               |                    |
| 0.4327         | 18    | 0.0171                               |                    | 0.0034                               |                    |
| 0.3243         | 19    | 0.0167                               |                    | 0.0033                               |                    |
| 0.3145         | 20    | 0.0162                               |                    | 0.0032                               |                    |
| 0.3006         | 21    | 0.0157                               |                    | 0.0031                               |                    |
| 0.2667         | 22    | 0.0153                               |                    | 0.0031                               |                    |
| 0.2326         | 23    | 0.0148                               |                    | 0.0030                               |                    |
| 0.2251         | 24    | 0.0144                               |                    | 0.0029                               |                    |
| 0.2210         | 25    | 0.0139                               |                    | 0.0028                               |                    |
| 0.2200         | 26    | 0.0134                               |                    | 0.0027                               |                    |
| 0.1689         | 27    | 0.0130                               |                    | 0.0026                               |                    |
| 0.1183         | 28    | 0.0125                               |                    | 0.0025                               |                    |
| 0.1146         | 29    | 0.0120                               |                    | 0.0024                               |                    |
| 0.0894         | 30    | 0.0116                               |                    | 0.0023                               |                    |
| 0.0436         | 31    | 0.0111                               |                    | 0.0022                               |                    |
| 0.0109         | 32    | 0.0106                               |                    | 0.0021                               |                    |
| <b>0.0091</b>  | 33    | 0.0102                               | *                  | 0.0020                               |                    |
| 0.0089         | 34    | 0.0097                               | *                  | 0.0019                               |                    |
| 0.0083         | 35    | 0.0093                               | *                  | 0.0019                               |                    |
| 0.0044         | 36    | 0.0088                               | *                  | 0.0018                               |                    |
| 0.0043         | 37    | 0.0083                               | *                  | 0.0017                               |                    |
| 0.0038         | 38    | 0.0079                               | *                  | 0.0016                               |                    |
| 0.0033         | 39    | 0.0074                               | *                  | 0.0015                               |                    |
| 0.0024         | 40    | 0.0069                               | *                  | 0.0014                               |                    |
| <b>0.0008</b>  | 41    | 0.0065                               | *                  | 0.0013                               | *                  |
| 0.0006         | 42    | 0.0060                               | *                  | 0.0012                               | *                  |
| 0.0006         | 43    | 0.0056                               | *                  | 0.0011                               | *                  |
| 0.0002         | 44    | 0.0051                               | *                  | 0.0010                               | *                  |
| 0.0001         | 45    | 0.0046                               | *                  | 0.0009                               | *                  |
| 0.0001         | 46    | 0.0042                               | *                  | 0.0008                               | *                  |
| 0.0001         | 47    | 0.0037                               | *                  | 0.0007                               | *                  |
| 0.0001         | 48    | 0.0032                               | *                  | 0.0006                               | *                  |
| 0.0001         | 49    | 0.0028                               | *                  | 0.0006                               | *                  |
| 0.0001         | 50    | 0.0023                               | *                  | 0.0005                               | *                  |
| 0.0001         | 51    | 0.0019                               | *                  | 0.0004                               | *                  |
| 0.0001         | 52    | 0.0014                               | *                  | 0.0003                               | *                  |
| 0.0001         | 53    | 0.0009                               | *                  | 0.0002                               | *                  |
| 0.0001         | 54    | 0.0005                               | *                  | 0.0001                               | *                  |

<sup>A</sup> According to Thissen et al. (2002); <sup>B</sup> An asterisk (\*) indicates the statistically significant *P*-value after B-H correction.

**Supp. Table S28.** Skeletal abnormalities in individuals heterozygous for pathogenic *NFI* missense variants affecting p.Met1149, p.Arg1276 and p.Lys1423.

| Skeletal abnormality       | N (%)                                                                              |                                                                                      |                                                                                                                                      |
|----------------------------|------------------------------------------------------------------------------------|--------------------------------------------------------------------------------------|--------------------------------------------------------------------------------------------------------------------------------------|
|                            | p.Met1149                                                                          | p.Arg1276                                                                            | p.Lys1423                                                                                                                            |
| Pectus excavatum/carinatum | 8/61 (13.1)                                                                        | 13/100 (13)                                                                          | 10/83 (12.1)                                                                                                                         |
| Scoliosis                  | 3/61 (4.9)                                                                         | 18/100 (18)                                                                          | 17/83 (20.5)                                                                                                                         |
| Sphenoid wing dysplasia    | 1/61 (1.6)                                                                         | 2/100 (2)                                                                            | 1/83 (1.2)                                                                                                                           |
| Other                      | marfanoid habitus, genu valgum, leg length discrepancy, clinodactyly and exostosis | marfanoid habitus, leg or limb length discrepancy, kyphosis, cherubism, osteoporosis | pes planus, kyphosis, bone cysts, lordosis, long bone dysplasia, cubitus valgus, osteoporosis, dysplastic vertebrae, pseudoarthrosis |
| Total                      | 15/61 (24.6)                                                                       | 32/100 (32)                                                                          | 34/83 (41)                                                                                                                           |

**Supp. Table S29.** Comparison of clinical features of the cohorts of individuals heterozygous for pathogenic *NFI* missense variants affecting p.Met1149, p.Arg1276 and p.Lys1423 referred for molecular *NFI* genetic testing to the Medical Genomics Laboratory at the University of Alabama at Birmingham (UAB) and to the collaborating institutions in Europe (EUR).

|                                                     | N (%)                        |                 |                 |                 |                              |                 | P value (2-tailed Fisher's exact test) |                            |                            |
|-----------------------------------------------------|------------------------------|-----------------|-----------------|-----------------|------------------------------|-----------------|----------------------------------------|----------------------------|----------------------------|
|                                                     | p.Met1149 (UAB) <sup>A</sup> | p.Met1149 (EUR) | p.Arg1276 (UAB) | p.Arg1276 (EUR) | p.Lys1423 (UAB) <sup>A</sup> | p.Lys1423 (EUR) | p.Met1149 (UAB versus EUR)             | p.Arg1276 (UAB versus EUR) | p.Lys1423 (UAB versus EUR) |
| >5 CALMs                                            | 56/63 (88.9)                 | 6/6 (100)       | 83/90 (92.2)    | 28/29 (96.6)    | 59/63 (93.7)                 | 27/28 (96.4)    | 1.0000                                 | 0.6777                     | 1.0000                     |
| Skinfold freckling                                  | 36/60 (60)                   | 4/5 (80)        | 59/87 (67.8)    | 15/25 (60)      | 43/59 (72.9)                 | 22/26 (84.6)    | 0.6412                                 | 0.4808                     | 0.2808                     |
| Lisch nodules <sup>B</sup>                          | 3/27 (11.1)                  | 0/2 (0)         | 5/23 (21.7)     | 7/16 (43.8)     | 11/21 (52.4)                 | 14/16 (87.5)    | 1.0000                                 | 0.1743                     | <b>0.0352<sup>G</sup></b>  |
| Major external plexiform neurofibromas <sup>B</sup> | 0/38 (0)                     | 0/4 (0)         | 1/41 (2.4)      | 4/23 (17.4)     | 10/30 (33.3)                 | 5/18 (27.8)     | 1.0000                                 | 0.0520                     | 0.7571                     |
| Cutaneous neurofibromas <sup>C</sup>                | 0-3/22 (0-13.6)              | 0/2 (0)         | 7/23 (30.4)     | 7/17 (41.2)     | 13/15 (86.7)                 | 10/13 (76.9)    | 1.0000                                 | 0.5206                     | 0.6389                     |
| Subcutaneous neurofibromas <sup>C</sup>             | 0-3/20 (0-9.7)               | 0/2 (0)         | 11/22 (50)      | 10/15 (66.7)    | 6/12 (50)                    | 7/11 (63.6)     | 1.0000                                 | 0.5000                     | 0.6802                     |
| Symptomatic spinal neurofibromas <sup>C</sup>       | 0/19 (0)                     | 0/2 (0)         | 8/19 (43)       | 9/17 (52.9)     | 0/13 (0)                     | 1/9 (11.1)      | 1.0000                                 | 0.7388                     | 0.4091                     |
| Symptomatic OPGs                                    | 0/52 (0)                     | 0/6 (0)         | 0/70 (0)        | 0/27 (0)        | 0/49 (0)                     | 1/25 (4)        | 1.0000                                 | 1.0000                     | 0.3378                     |
| Asymptomatic OPGs                                   | 0/19 (0)                     | 0/4 (0)         | 1/29 (3.5)      | 0/19 (0)        | 3/20 (15)                    | 3/20 (15)       | 1.0000                                 | 1.0000                     | 1.0000                     |
| Other malignant neoplasms <sup>D</sup>              | 0/51 (0)                     | 0/6 (0)         | 2/67 (3)        | 2/27 (7.4)      | 4/53 (7.6)                   | 3/24 (12.5)     | 1.0000                                 | 0.5759                     | 0.6706                     |
| Skeletal abnormalities                              | 13/55 (23.6)                 | 2/6 (33.3)      | 26/74 (35.1)    | 6/26 (23.1)     | 21/59 (35.6)                 | 13/24 (54.2)    | 0.6297                                 | 0.3315                     | 0.1437                     |
| Scoliosis <sup>C</sup>                              | 1/18 (3.9)                   | 1/2 (50)        | 5/19 (26.3)     | 3/16 (18.8)     | 5/15 (33.3)                  | 5/12 (41.7)     | 0.1947                                 | 0.7003                     | 0.7063                     |
| Cognitive impairment and/or learning disabilities   | 28/60 (46.7)                 | 3/6 (50)        | 39/80 (48.8)    | 7/25 (28)       | 26/60 (43.3)                 | 10/27 (37)      | 1.0000                                 | 0.1050                     | 0.6431                     |
| Noonan-like phenotype <sup>E</sup>                  | 15/56 (26.8)                 | 3/6 (50)        | 20/81 (24.7)    | 2/25 (8)        | 16/58 (27.6)                 | 8/25 (32)       | 0.3442                                 | 0.0926                     | 0.7929                     |
| Short stature <sup>F</sup>                          | 5/30 (16.7)                  | 0/3 (0)         | 11/60 (18.3)    | 3/20 (15)       | 11/31 (35.5)                 | 10/20 (50)      | 1.0000                                 | 1.0000                     | 0.3863                     |
| Macrocephaly                                        | 17/41 (41.5)                 | 2/4 (50)        | 21/63 (33.3)    | 3/13 (23.1)     | 12/36 (33.3)                 | 3/15 (20)       | 1.0000                                 | 0.7440                     | 0.5034                     |
| Pulmonic stenosis                                   | 2/46 (4.4)                   | 0/6 (0)         | 9/69 (13)       | 2/23 (8.7)      | 9/50 (18)                    | 2/26 (7.7)      | 1.0000                                 | 0.7245                     | 0.3130                     |
| Cardiovascular abnormalities                        | 4/46 (8.7)                   | 1/6 (16.7)      | 17/69 (24.6)    | 5/23 (21.7)     | 16/50 (32)                   | 3/26 (11.5)     | 0.4726                                 | 1.0000                     | 0.0570                     |

<sup>A</sup> Excluding UAB-R1495 and UAB-R1753 carrying c.3445A>T (p.Met1149Leu) and c.4268A>T (p.Lys1423Met), respectively as the interpretation of these specific variants is “*variant of uncertain significance*” and “*likely pathogenic*”, respectively according to the ACMG recommendations (Richards et al., 2015); <sup>B</sup> In individuals  $\geq 9$  years old. <sup>C</sup> In individuals  $\geq 19$  years old. <sup>D</sup> Only malignant neoplasms, not including OPGs and neurofibromas, have been taken into account. <sup>E</sup> As individual was classified as having a Noonan-like phenotype when at least two of the following features were present: short stature, low set ears, hypertelorism, midface hypoplasia, webbed neck, pectus abnormality and/or pulmonic stenosis. <sup>F</sup> As no specific growth curves are available for Hispanic and Asian populations, Hispanic and Asian individuals were excluded as having short or normal stature. <sup>G</sup> After applying the Benjamini-Hochberg correction  $P = 0.0352$  did not remain statistically significant at FDR of 0.05 and 0.01 (see details in Supporting Information Table S30).

**Abbreviations:** CALMs - café-au-lait macules; OPG - optic pathway glioma.

**Supp. Table S30.** List of all adjusted  $P$  values from Supporting Information Table S29 after applying the Benjamini-Hochberg correction for multiple testing with false discovery rates (FDR) at 0.05 and 0.01.

| $P$ value | index | Statistical significance at FDR=0.05 |                    | Statistical significance at FDR=0.01 |                    |
|-----------|-------|--------------------------------------|--------------------|--------------------------------------|--------------------|
|           |       | B-H critical <sup>A</sup>            | value <sup>B</sup> | B-H critical <sup>A</sup>            | value <sup>B</sup> |
| 1.0000    | 1     | 0.0250                               |                    | 0.0050                               |                    |
| 1.0000    | 2     | 0.0245                               |                    | 0.0049                               |                    |
| 1.0000    | 3     | 0.0241                               |                    | 0.0048                               |                    |
| 1.0000    | 4     | 0.0236                               |                    | 0.0047                               |                    |
| 1.0000    | 5     | 0.0231                               |                    | 0.0046                               |                    |
| 1.0000    | 6     | 0.0227                               |                    | 0.0045                               |                    |
| 1.0000    | 7     | 0.0222                               |                    | 0.0044                               |                    |
| 1.0000    | 8     | 0.0218                               |                    | 0.0044                               |                    |
| 1.0000    | 9     | 0.0213                               |                    | 0.0043                               |                    |
| 1.0000    | 10    | 0.0208                               |                    | 0.0042                               |                    |
| 1.0000    | 11    | 0.0204                               |                    | 0.0041                               |                    |
| 1.0000    | 12    | 0.0199                               |                    | 0.0040                               |                    |
| 1.0000    | 13    | 0.0194                               |                    | 0.0039                               |                    |
| 1.0000    | 14    | 0.0190                               |                    | 0.0038                               |                    |
| 1.0000    | 15    | 0.0185                               |                    | 0.0037                               |                    |
| 1.0000    | 16    | 0.0181                               |                    | 0.0036                               |                    |
| 1.0000    | 17    | 0.0176                               |                    | 0.0035                               |                    |
| 1.0000    | 18    | 0.0171                               |                    | 0.0034                               |                    |
| 1.0000    | 19    | 0.0167                               |                    | 0.0033                               |                    |
| 0.7929    | 20    | 0.0162                               |                    | 0.0032                               |                    |
| 0.7571    | 21    | 0.0157                               |                    | 0.0031                               |                    |
| 0.7440    | 22    | 0.0153                               |                    | 0.0031                               |                    |
| 0.7388    | 23    | 0.0148                               |                    | 0.0030                               |                    |
| 0.7245    | 24    | 0.0144                               |                    | 0.0029                               |                    |
| 0.7063    | 25    | 0.0139                               |                    | 0.0028                               |                    |
| 0.7003    | 26    | 0.0134                               |                    | 0.0027                               |                    |
| 0.6802    | 27    | 0.0130                               |                    | 0.0026                               |                    |
| 0.6777    | 28    | 0.0125                               |                    | 0.0025                               |                    |
| 0.6706    | 29    | 0.0120                               |                    | 0.0024                               |                    |
| 0.6431    | 30    | 0.0116                               |                    | 0.0023                               |                    |
| 0.6412    | 31    | 0.0111                               |                    | 0.0022                               |                    |
| 0.6389    | 32    | 0.0106                               |                    | 0.0021                               |                    |
| 0.6297    | 33    | 0.0102                               |                    | 0.0020                               |                    |
| 0.5759    | 34    | 0.0097                               |                    | 0.0019                               |                    |
| 0.5206    | 35    | 0.0093                               |                    | 0.0019                               |                    |
| 0.5034    | 36    | 0.0088                               |                    | 0.0018                               |                    |
| 0.5000    | 37    | 0.0083                               |                    | 0.0017                               |                    |
| 0.4808    | 38    | 0.0079                               |                    | 0.0016                               |                    |
| 0.4726    | 39    | 0.0074                               |                    | 0.0015                               |                    |
| 0.4091    | 40    | 0.0069                               |                    | 0.0014                               |                    |
| 0.3863    | 41    | 0.0065                               |                    | 0.0013                               |                    |
| 0.3442    | 42    | 0.0060                               |                    | 0.0012                               |                    |
| 0.3378    | 43    | 0.0056                               |                    | 0.0011                               |                    |
| 0.3315    | 44    | 0.0051                               |                    | 0.0010                               |                    |
| 0.3130    | 45    | 0.0046                               |                    | 0.0009                               |                    |
| 0.2808    | 46    | 0.0042                               |                    | 0.0008                               |                    |
| 0.1947    | 47    | 0.0037                               |                    | 0.0007                               |                    |
| 0.1743    | 48    | 0.0032                               |                    | 0.0006                               |                    |
| 0.1437    | 49    | 0.0028                               |                    | 0.0006                               |                    |
| 0.1050    | 50    | 0.0023                               |                    | 0.0005                               |                    |
| 0.0926    | 51    | 0.0019                               |                    | 0.0004                               |                    |
| 0.0570    | 52    | 0.0014                               |                    | 0.0003                               |                    |
| 0.0520    | 53    | 0.0009                               |                    | 0.0002                               |                    |
| 0.0352    | 54    | 0.0005                               |                    | 0.0001                               |                    |

<sup>A</sup> According to Thissen et al. (2002); <sup>B</sup> No statistically significant  $P$ -value after B-H correction.

**Supp. Table S31.** The prevalence of pulmonic stenosis in the studied cohorts and in individuals heterozygous for pathogenic *NF1* missense variants affecting codons 1809 and 844-848, p.Met992del, the cohort of the individuals carrying one out of the 18 most frequent recurrent pathogenic nonsense variants observed in the University of Alabama at Birmingham (UAB) database and in the general NF1 population.

| Study                                                                        | N (%)          | Reference                                                                                                                                                                                                       |
|------------------------------------------------------------------------------|----------------|-----------------------------------------------------------------------------------------------------------------------------------------------------------------------------------------------------------------|
| Pathogenic missense variants affecting codons 844-848                        | 2/113 (1.8)    | Koczkowska et al. (2018)                                                                                                                                                                                        |
| In-frame deletion p.Met992del                                                | 8/160 (5)      | Upadhyaya et al. (2007); Koczkowska et al. (2019)                                                                                                                                                               |
| Pathogenic missense variants affecting p.Met1149                             | 2/52 (3.9)     | Current study                                                                                                                                                                                                   |
| Pathogenic missense variants affecting p.Arg1276                             | 11/92 (12)     | Current study                                                                                                                                                                                                   |
| Pathogenic missense variants affecting p.Lys1423                             | 11/76 (14.5)   | Current study                                                                                                                                                                                                   |
| Pathogenic missense variants affecting p.Arg1809                             | 14/132 (10.6)  | Nyström et al. (2009); Ekvall et al. (2014); Pinna et al. (2015); Santoro et al. (2015); Rojnueangnit et al. (2015)                                                                                             |
| Pathogenic variants affecting codons 844-848, 992, 1149, 1276, 1423 and 1809 | 48/625 (7.7)   | Upadhyaya et al. (2007); Nyström et al. (2009); Ekvall et al. (2014); Pinna et al. (2015); Santoro et al. (2015); Rojnueangnit et al. (2015); Koczkowska et al. (2018); Koczkowska et al. (2019); Current study |
| UAB nonsense variants cohort                                                 | 13/701 (1.9)   | Current study                                                                                                                                                                                                   |
| General NF1 population                                                       | 25/2,322 (1.1) | Lin et al. (2000)                                                                                                                                                                                               |



**Supp. Table S32.** The overall prevalence of cardiac/cardiovascular abnormalities, excluding hypertension as the only feature, in the studied cohorts and in individuals heterozygous for pathogenic *NF1* missense variants affecting codons 1809 and 844-848, p.Met992del, the cohort of the individuals carrying one out of the 18 most frequent recurrent pathogenic nonsense variants observed in the University of Alabama at Birmingham (UAB) database and in the general NF1 population.

| <b>Study</b>                                          | <b>N (%)</b>   | <b>Reference</b>           |
|-------------------------------------------------------|----------------|----------------------------|
| Pathogenic missense variants affecting codons 844-848 | 10/113 (8.9)   | Koczkowska et al. (2018)   |
| In-frame deletion p.Met992del                         | 10/113 (8.9)   | Koczkowska et al. (2019)   |
| Pathogenic missense variants affecting p.Met1149      | 5/52 (9.6)     | Current study              |
| Pathogenic missense variants affecting p.Arg1276      | 19/92 (20.7)   | Current study              |
| Pathogenic missense variants affecting p.Lys1423      | 18/76 (23.7)   | Current study              |
| Pathogenic missense variants affecting p.Arg1809      | 16/105 (15.2)  | Rojnueangnit et al. (2015) |
| UAB nonsense variants cohort                          | 39/701 (5.6)   | Current study              |
| General NF1 population                                | 54/2,322 (2.3) | Lin et al. (2000)          |

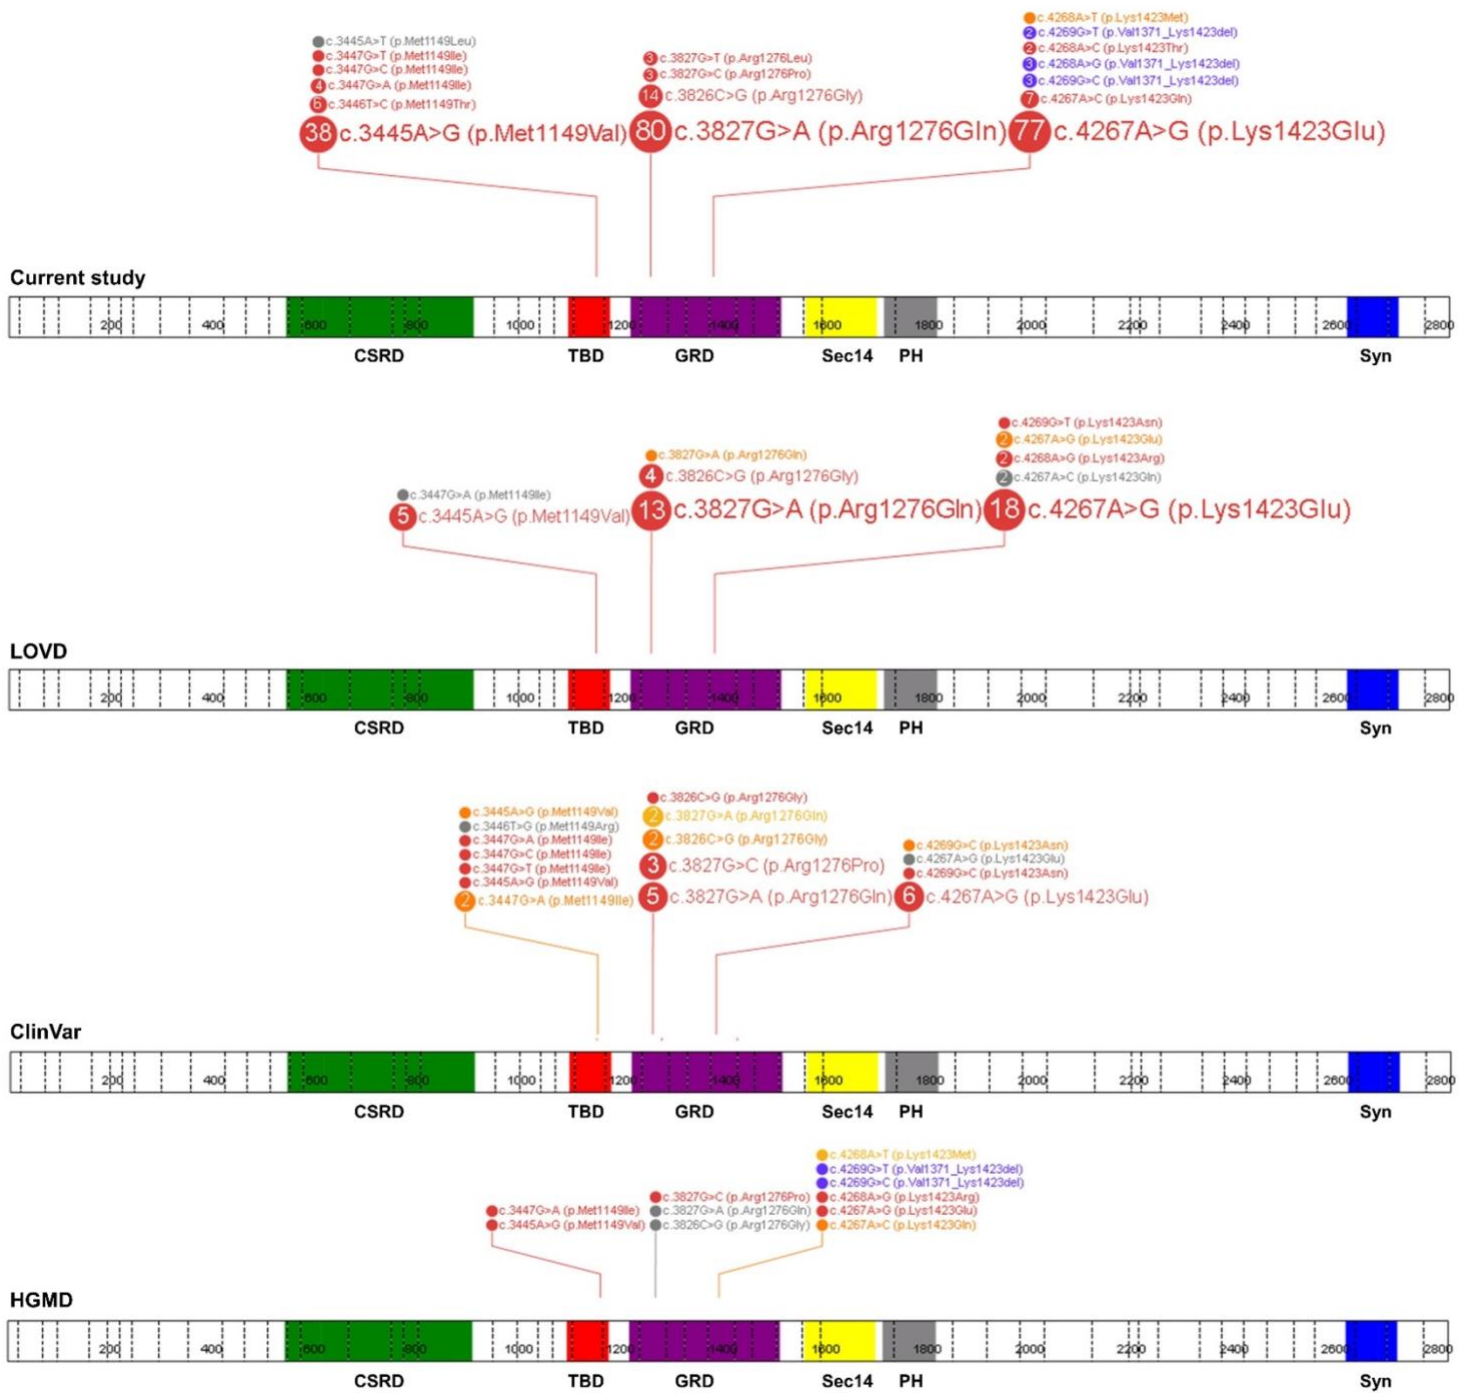

**Supp. Figure S1.** The classification of *NFI* missense variants affecting p.Met1149, p.Arg1276 and p.Lys1423: comparison of the classification reported in publicly available disease databases (HGMD, LOVD and ClinVar) with the current study (as of December 2018).

The classification of the variants deposited in the publicly available LOVD and ClinVar databases are shown here as reported by the original author(s). For variants deposited in the HGMD database, the originally reported variants' classifications were reviewed and if necessary re-classified according to the ACMG guidelines (Richards et al., 2015) based on the evidence for pathogenicity provided in the published papers by the authors (see details below). Each number in the circle corresponds to the total number of probands with a specific variant. Different colors correspond with the pathogenicity score according to the legend presented below (c.4268A>G, c.4269G>C and c.4269G>T are not *true* missense variants; these variants lead to skipping of exon 32 [24] during *NF1* mRNA splicing as observed by RNA-based analysis in blood). The figure was prepared using ProteinPaint application (Zhou et al., 2016).

**HGMD:** **c.3445A>G (p.Met1149Val)** and **c.4267A>C (p.Lys1423Gln)** absence in normal controls, segregation studies, proven *de novo* with paternity confirmation, *in silico* analysis (van Minkelen et al., 2014); **c.3447G>A (p.Met1149Ile)** - reported in 1/169 unrelated NF1 individuals, absent in normal controls and proven *de novo* (Griffiths et al., 2007); **c.3826C>G (p.Arg1276Gly)** - reported in 2/91 unrelated NF1 individuals fulfilling the NIH diagnostic criteria, no phenotypic details available, no evidence for pathogenicity provided (Mattocks et al., 2004); **c.3827G>A (p.Arg1276Gln)** - reported in 2/521 unrelated NF1 individuals, *in silico* analysis, no other evidence for pathogenicity provided (Fahsold et al., 2000); **c.3827G>C (p.Arg1276Pro)** - based on functional studies (Klose et al., 1998); **c.4267A>G (p.Lys1423Glu)** - segregation studies (variant reported in 5 NF1-affected family members) and functional studies (Li et al., 1992); **c.4268A>G (p.Lys1423Arg)** - reported once in sporadic case of 50 unrelated NF1 individuals, absent in normal controls, but no proven *de novo*, *in silico* analysis (Han et al., 2001); **c.4268A>T (p.Lys1423Met)** - no evidence for pathogenicity provided (Corsello et al., 2018); **c.4269G>C (p.Lys1423Asn)** - reported in 1/374 unrelated NF1 individuals, based on *NF1* screening with an RNA-based approach and *in-silico* analysis this variant was reported as skipping of exon 32 [24] during *NF1* mRNA splicing and to result in a low level of transcript with p.Lys1423Asn missense variant, r.[4269g>c,4111\_4269del] (p.[Lys1423Asn,Val1371\_Lys1423del]; Pros et al., 2008); **c.4269G>T (p.Lys1423Asn)** - absence in normal controls, disease phenotype segregated with the variant in familial cases, *in silico* analysis; however, no RNA-based approach, therefore missplicing was not recognized in the original paper (De Luca et al., 2005).

**Abbreviations:** **CSRD** - **c**ysteine-**s**erine **r**ich **d**omain; **TBD** - **t**ubulin **b**inding **d**omain; **GRD** - **G**AP (GTPase-activating protein) **r**elated **d**omain; **Sec14** - **Sec14** homology-like domain; **PH** - **p**leckstrin **h**omology-like domain; **Syn** - **s**yn~~de~~can binding domain.

-  **Pathogenic**
-  **Likely pathogenic**
-  **Variant of uncertain significance**
-  **Clinical significance not provided**
-  **Splicing mutation**

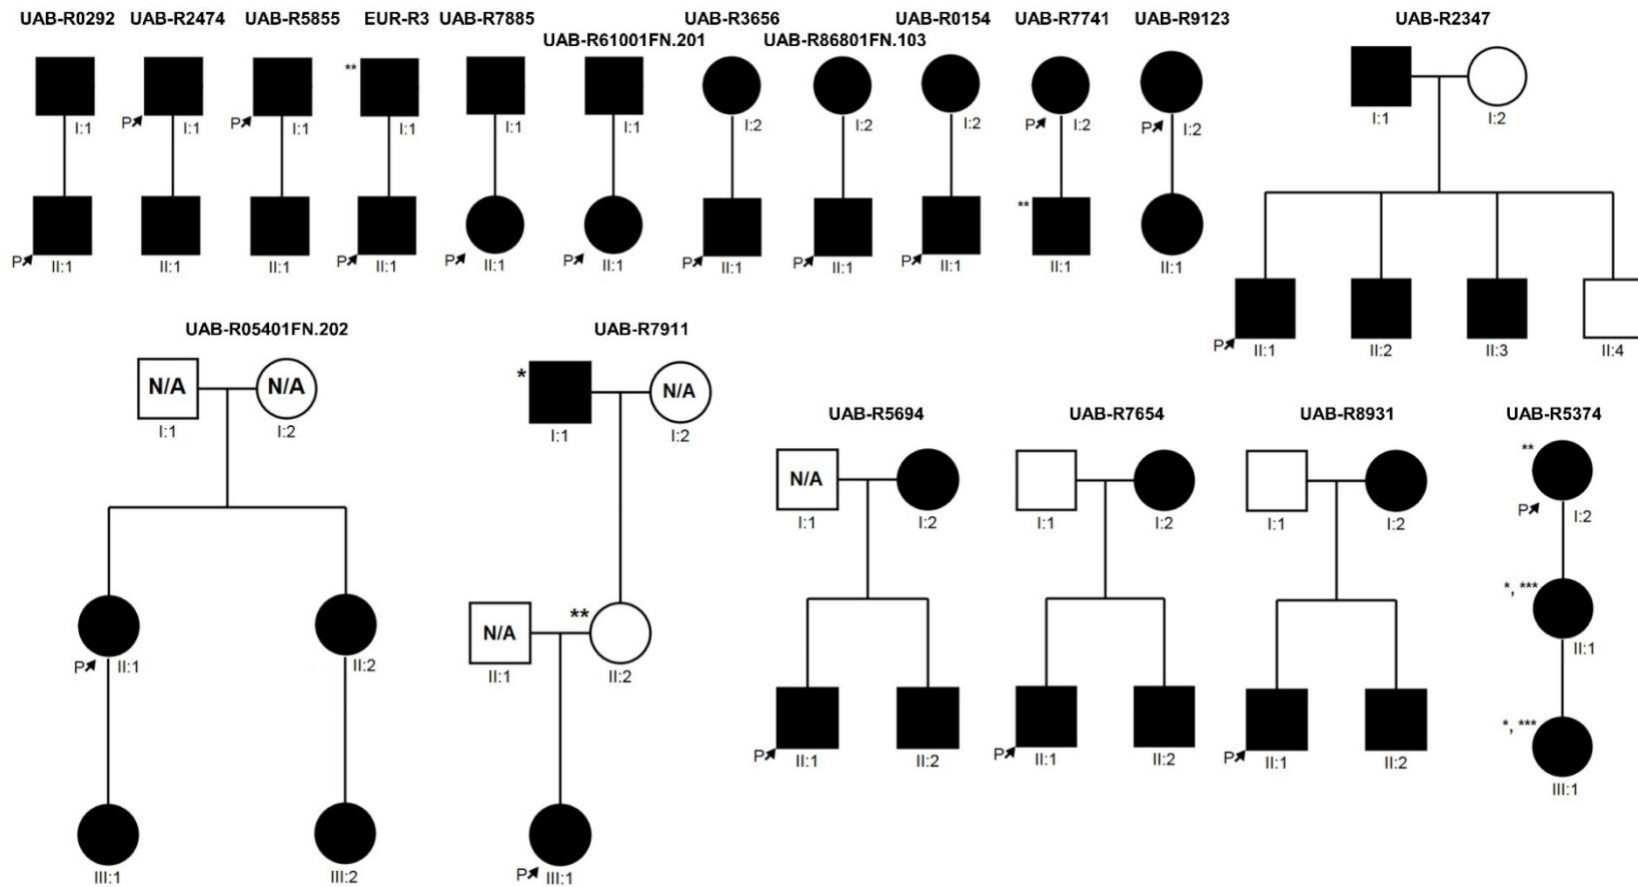

**Supp. Figure S2.** Pedigrees of the familial cases heterozygous for pathogenic *NFI* missense variants affecting p.Met1149 in the current study.

The filled black symbols represent the individuals who are positive for an *NFI* missense pathogenic variants affecting p.Met1149, while the open symbols represent relatives who are negative for the family specific variant. The arrow indicates the proband of the family. For the first generation, father is always I:1 and mother is I:2.

**Abbreviations:** N/A - the relatives not available for genetic analysis; \* - no clinical information available for these individuals; \*\* - no clinical signs of NF1, including no pigmented manifestations reported in these individuals; \*\*\* - *NFI* genetic testing not performed at UAB.

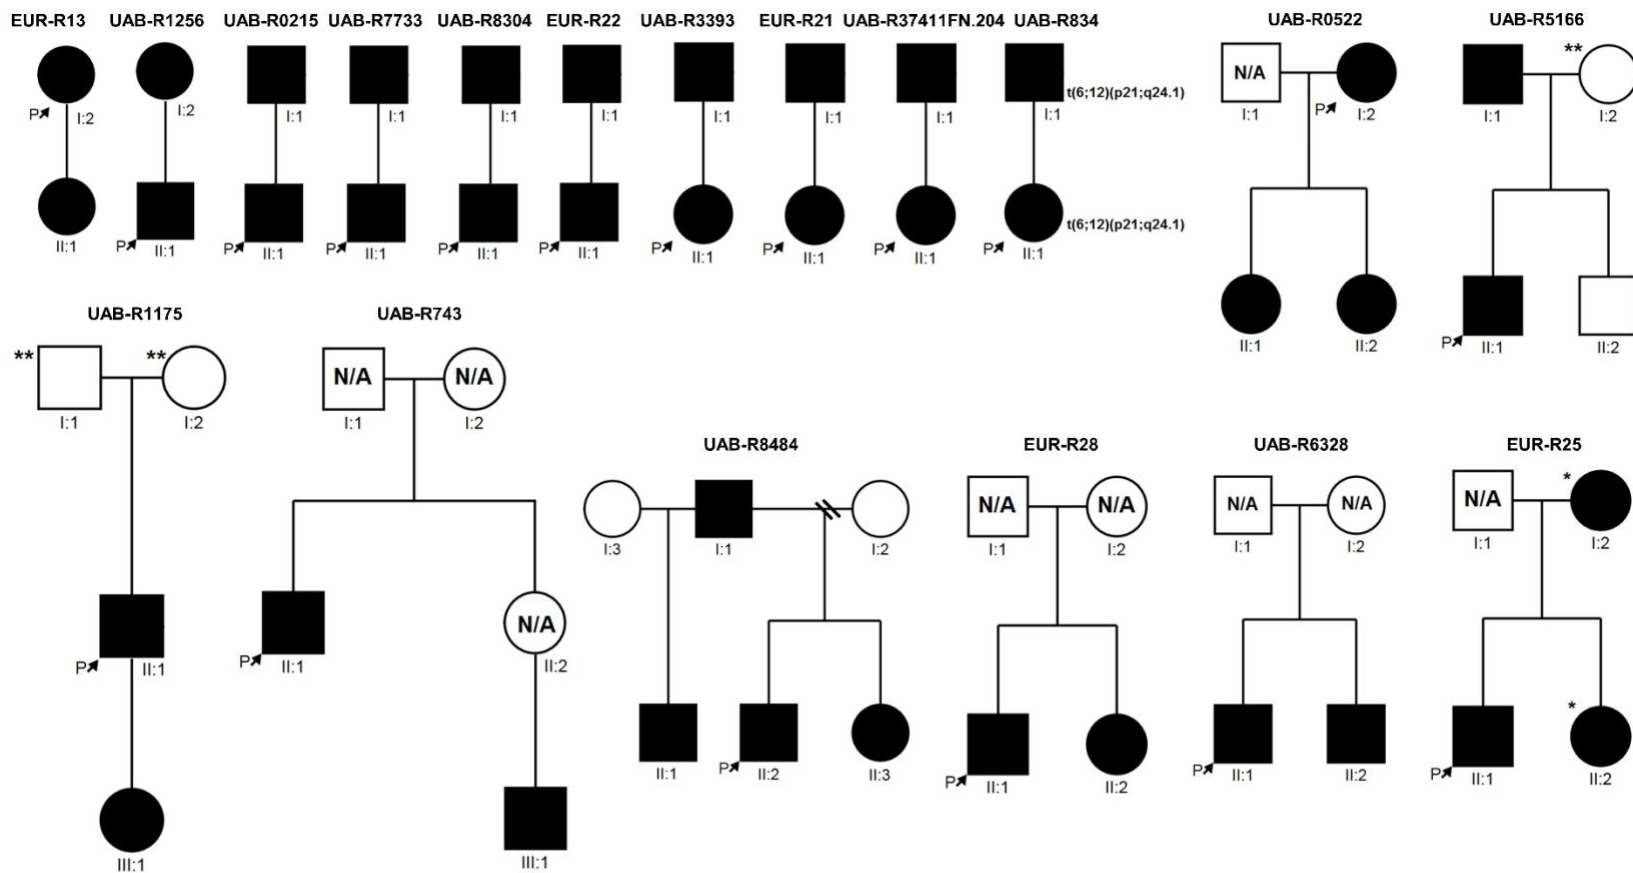

**Supp. Figure S3.** Pedigrees of the familial cases heterozygous for pathogenic *NFI* missense variants affecting p.Arg1276 in the current study.

The filled black symbols represent the individuals who are positive for an *NFI* missense pathogenic variants affecting p.Arg1276, while the open symbols represent relatives who are negative for the family specific variant. The arrow indicates the proband of the family. For the first generation, father is always I:1 and mother is I:2.

**Abbreviations:** N/A - the relatives not available for genetic analysis; \* - no clinical information available for these individuals; \*\* - no clinical signs of NF1, including no pigmented manifestations reported in these individuals.

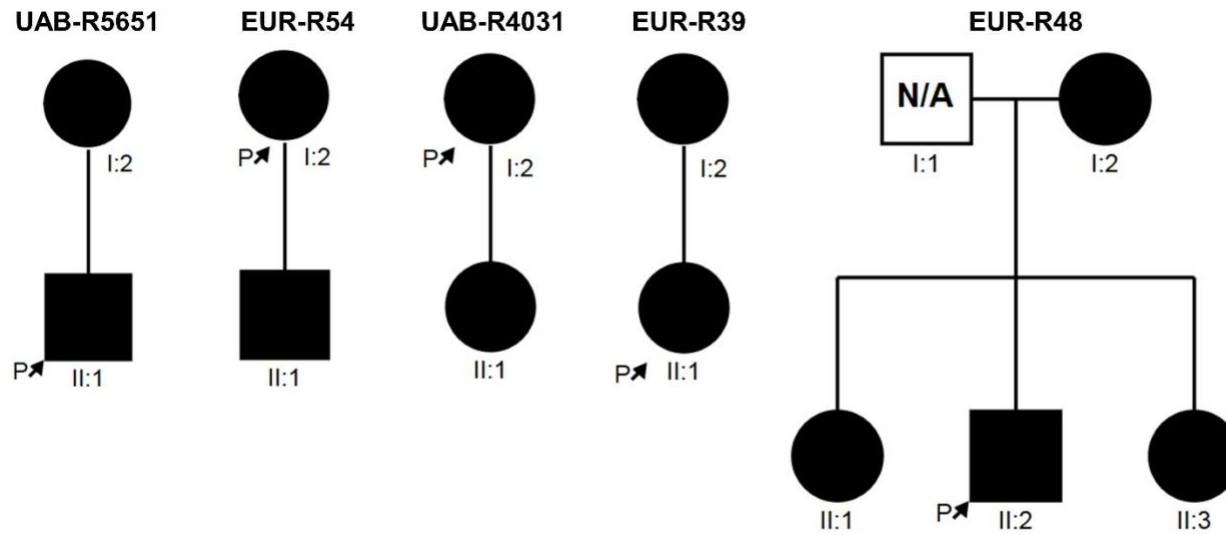

**Supp. Figure S4.** Pedigrees of the familial cases heterozygous for pathogenic *NF1* missense variants affecting p.Lys1423 in the current study.

The filled black symbols represent the individuals who are positive for an *NF1* missense pathogenic variants affecting p.Lys1423, while the open symbols represent relatives who are negative for the family specific variant. The arrow indicates the proband of the family. For the first generation, father is always I:1 and mother is I:2.

**Abbreviations:** N/A - the relatives not available for genetic analysis.

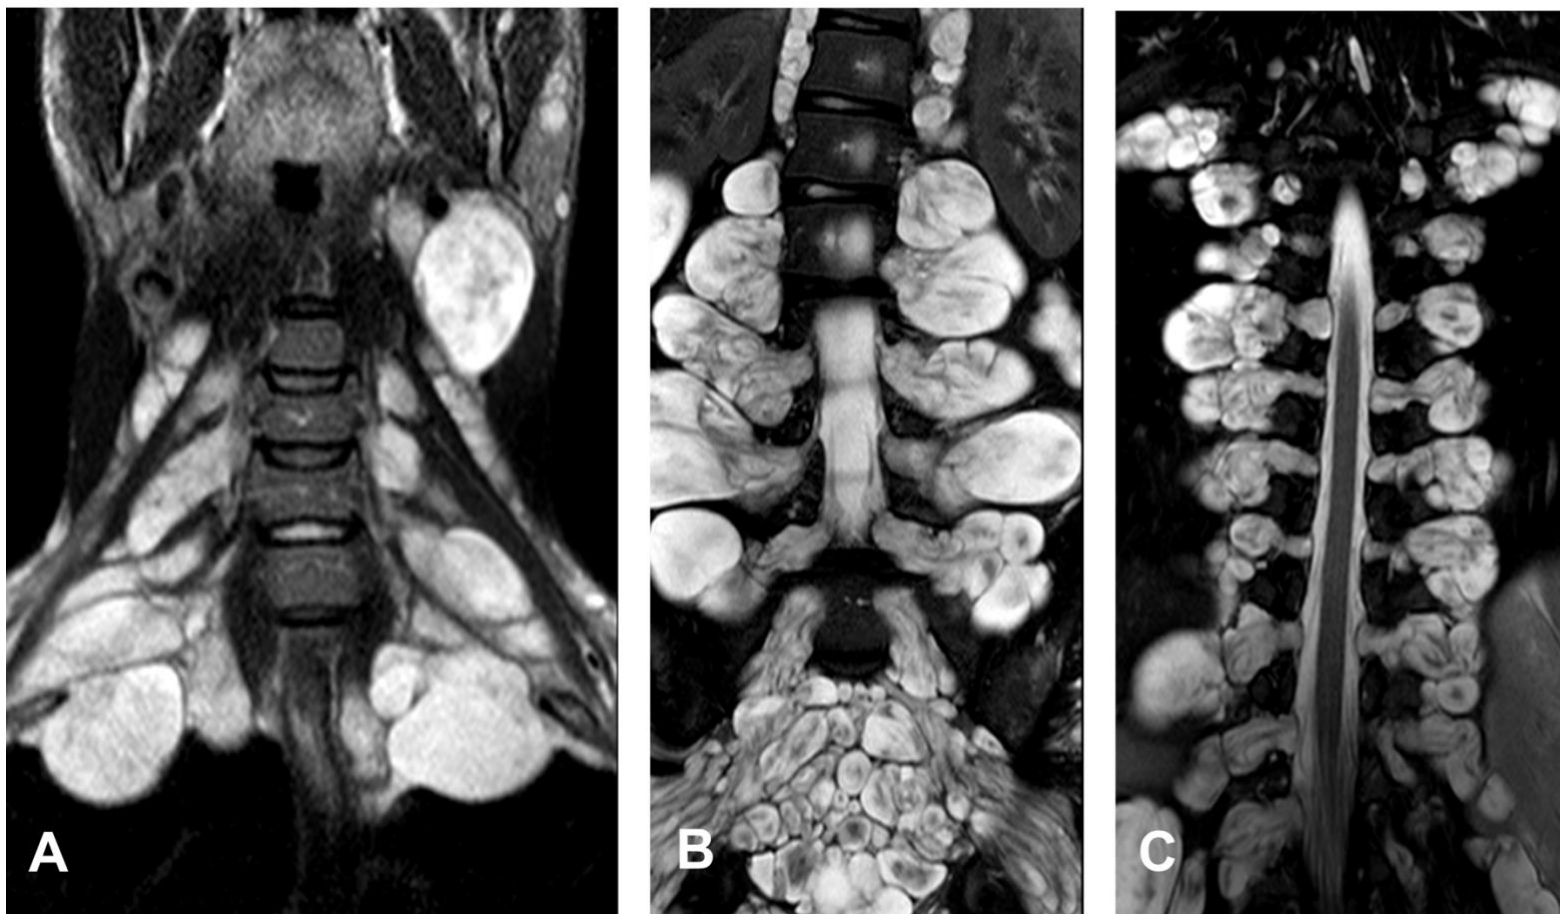

**Supp. Figure S5.** Coronal T2-weighted STIR MR images of the cervical (A), lumbosacral (B) and dorsal (C) spine showing bilateral giant and fairly confluent plexiform neurofibromas of all paraspinal nerves and plexuses in individual EUR-R22-F. Note the intraspinal tumor origin in all the spinal foramina which appear widening without extension in the spinal canal. Referred by Marica Eoli, MD (Fondazione IRCCS Istituto Neurologico Carlo Besta, Milan, Italy).

## Supp. References

- Blanchard, G., Lafforgue MP, Lion-François L, et al. (2016). Systematic MRI in NF1 children under six years of age for the diagnosis of optic pathway gliomas. Study and outcome of a French cohort. *Eur J Paediatr Neurol.* 20, 275-281.
- Blazo, M.A., Lewis, R.A., Chintagumpala, M.M., Frazier, M., McCluggage, C., Plon, S.E. (2004). Outcomes of systematic screening for optic pathway tumors in children with Neurofibromatosis Type 1. *Am J Med Genet A.* 127A, 224-229.
- Cnossen MH, de Goede-Bolder A, van den Broek KM, et al. (1998). A prospective 10 year follow up study of patients with neurofibromatosis type 1. *Arch Dis Child.* 78(5), 408-412.
- Corsello G, Antona V, Serra G, et al. (2018). Clinical and molecular characterization of 112 single-center patients with Neurofibromatosis type 1. *Ital J. Pediatr.* 44(1), 45.
- De Luca A, Bottillo I, Sarkozy A, et al. (2005). *NF1* gene mutations represent the major molecular event underlying neurofibromatosis-Noonan syndrome. *Am J Hum Genet.* 77(6), 1092-1101.
- Ekvall S, Sjörs K, Jonzon A, Vihinen M, Annerén G, Bondeson ML. (2014). Novel association of neurofibromatosis type 1-causing mutations in families with neurofibromatosis-Noonan syndrome. *Am J Med Genet A.* 164A(3), 579-587.
- Fahsold R, Hoffmeyer S, Mischung C, et al. (2000). Minor lesion mutational spectrum of the entire *NF1* gene does not explain its high mutability but points to a functional domain upstream of the GAP-related domain. *Am J Hum Genet.* 66(3), 790-818.
- Friedman JM, Birch PH. (1997). Type 1 neurofibromatosis: a descriptive analysis of the disorder in 1,728 patients. *Am J Med Genet.* 70(2), 138-143.
- Griffiths S, Thompson P, Frayling I, Upadhyaya M. (2007). Molecular diagnosis of neurofibromatosis type 1: 2 years experience. *Fam Cancer.* 6(1), 21-34.
- Han SS, Cooper DN, Upadhyaya MN. (2001). Evaluation of denaturing high performance liquid chromatography (DHPLC) for the mutational analysis of the neurofibromatosis type 1 (*NF1*) gene. *Hum Genet.* 109(5), 487-497.
- Huson SM, Harper PS, Compston DA. (1988). Von Recklinghausen neurofibromatosis. A clinical and population study in south-east Wales. *Brain.* 111(Pt 6), 1355-1381.



Huson SM, Compston DA, Clark P, Harper PS. (1989a). A genetic study of von Recklinghausen neurofibromatosis in south east Wales. I. Prevalence, fitness, mutation rate, and effect of parental transmission on severity. *J Med Genet.* 26(11), 704-711.

Huson SM, Compston DA, Harper PS. (1989b). A genetic study of von Recklinghausen neurofibromatosis in south east Wales. II. Guidelines for genetic counselling. *J Med Genet.* 26(11), 712-721.

Ioannidis NM, Rothstein JH, Pejaver V, et al. (2016). REVEL: an ensemble method for predicting the pathogenicity of rare missense variants. *Am J Hum Genet.* 99(4), 877-885.

Khosrotehrani K, Bastuji-Garin S, Riccardi VM, Birch P, Friedman JM, Wolkenstein P. (2005). Subcutaneous neurofibromas are associated with mortality in neurofibromatosis 1: a cohort study of 703 patients. *Am J Med Genet A.* 132A(1), 49-53.

Klose A, Ahmadian MR, Schuelke M, et al. (1998). Selective disactivation of neurofibromin GAP activity in neurofibromatosis type 1. *Hum Mol Genet.* 7(8), 1261-1268.

Koczkowska M, Chen Y, Callens T, et al. (2018). Genotype-phenotype correlation in NF1: evidence for a more severe phenotype associated with missense mutations affecting *NF1* codons 844-848. *Am J Hum Genet.* 102(1), 69-87.

Koczkowska M, Callens T, Gomes A, et al. (2019). Expanding the clinical phenotype of individuals with a 3-bp in-frame deletion of the *NF1* gene (c.2970\_2972del): an update of genotype-phenotype correlation. *Genet Med.* 21(4), 867-876.

Korf BR, Henson JW, Stemmer-Rachamimov A. (2005). Case records of the Massachusetts General Hospital. Case 13-2005. A 48-year-old man with weakness of the limbs and multiple tumors of spinal nerves. *N Eng J Med.* 352(17), 1800-1808.

Li Y, Bollag G, Clark R, et al. (1992) Somatic mutations in the neurofibromatosis 1 gene in human tumors. *Cell* 69(2), 275-281.

Lin AE, Birch PH, Korf BR, et al. (2000). Cardiovascular malformations and other cardiovascular abnormalities in neurofibromatosis 1. *Am J Med Genet.* 95(2), 108-117.

Listernick R, Charrow J, Greenwald M, Mets M. (1994). Natural history of optic pathway tumors in children with neurofibromatosis type 1: a longitudinal study. *J Pediatr.* 125(1), 63-66.

Mattocks C, Baralle D, Tarpey P, French-Constant C, Bobrow M, Whittaker J. (2004). Automated comparative sequence analysis identifies mutations in 89% of NF1 patients and confirms a mutation cluster in exons 11-17 distinct from the GAP related domain. *J Med Genet.* 41(4), e48.

McGaughran JM, Harris DI, Donnai D, et al. (1999). A clinical study of type 1 neurofibromatosis in north west England. *J Med Genet.* 36(3), 197-203.

Messiaen LM, Callens T, Mortier G, et al. (2000). Exhaustive mutation analysis of the *NF1* gene allows identification of 95% of mutations and reveals a high frequency of unusual splicing defects. *Hum Mutat.* 15(6), 541-555.

Messiaen LM, Wimmer K. (2012). Mutation analysis of the *NF1* gene by cDNA-based sequencing of the coding region. Cunha KSG, Geller M, eds. *Advances in neurofibromatosis research*. Hauppauge, NY: Nova Science Publishers, 89-108.

Nyström AM, Ekvall S, Strömberg B, et al. (2009). A severe form of Noonan syndrome and autosomal dominant café-au-lait spots - evidence for different genetic origins. *Acta Paediatr.* 98(4), 693-698.

Pinna V, Lanari V, Daniele P, et al. (2015). p.Arg1809Cys substitution in neurofibromin is associated with a distinctive NF1 phenotype without neurofibromas. *Eur J Hum Genet.* 23(8), 1068-1071.

Plotkin SR, Bredella MA, Cai W, et al. (2012). Quantitative assessment of whole-body tumor burden in adult patients with neurofibromatosis. *PLoS One.* 7(4), e35711.

Pouillet P, Lin B, Esson K, Fuyuhiko T. (1994). Functional significance of lysine 1423 of neurofibromin and characterization of a second site suppressor which rescues mutations at this residue and suppresses RAS2Val-19-activated phenotypes. *Mol Cell Biol.* 14(1), 815-821.

Pros E, Gómez C, Martín T, Fábregas P, Serra E, Lázaro C. (2008). Nature and mRNA effect of 282 different *NF1* point mutations: focus on splicing alterations. *Hum Mut.* 29(9), E173-E193.

Richards S, Aziz N, Bale S, et al. (2015). Standards and guidelines for the interpretation of sequence variants: a joint consensus recommendation of the American College of Medical Genetics and Genomics and the Association for Molecular Pathology. *Genet Med.* 17(5), 405-424.

Rojnueangnit K, Xie J, Gomes A, et al. (2015). High incidence of Noonan syndrome features including short stature and pulmonary stenosis in patients carrying *NF1* missense mutations affecting p.Arg1809: genotype-phenotype correlation. *Hum Mutat.* 36(11), 1052-1063.

Santoro C, Maietta A, Giugliano T, et al. (2015). Arg<sup>1809</sup> substitution in neurofibromin: further evidence of a genotype-phenotype correlation in neurofibromatosis type 1. *Eur J Hum Genet.* 23(11), 1460-1461.

Scheffzek K and Welti S. (2012). Neurofibromin: protein domains and functional characteristics. In Neurofibromatosis type 1. Molecular and cellular biology. Upadhyaya M, Cooper DN, ed. Springer-Verlag Berlin Heidelberg, 305- 326.

Thakkar SD, Feigen U, Mautner VF. (1999). Spinal tumours in neurofibromatosis type 1: an MRI study of frequency, multiplicity and variety. *Neuroradiology.* 41(9), 625-629.

Thissen D, Steinberg L, Kuang D. (2002). Quick and easy implementation of the Benjamini-Hochberg procedure for controlling the false positive rate in multiple comparisons. *J Educ Behav Stat.* 27(1), 77-83.

Upadhyaya M, Huson SM, Davies M, et al. (2007) An absence of cutaneous neurofibromas associated with a 3-bp inframe deletion in exon 17 of the *NF1* gene (c.2970-2972 delAAT): evidence of a clinically significant NF1 genotype-phenotype correlation. *Am J Hum Genet.* 80(1), 140-151.

van Minkelen R, van Bever Y, Kromosoeto JN, et al. (2014). A clinical and genetic overview of 18 years neurofibromatosis type 1 molecular diagnostics in the Netherlands. *Clin Genet.* 85(4), 318-327.

Zhou X, Edmonson MN, Wilkinson MR, et al. (2016). Exploring genomic alteration in pediatric cancer using ProteinPaint. *Nat Genet.* 48(1), 4-6.
